# Supplementary material for: Integrative analysis of human protein, function and disease networks
Source: PubMed Central journal article supplement (PMC4585831; doi:10.1038/srep14344), 2015-09-24
Supplement: srep14344-s1.pdf [file srep14344-s1.pdf]

# Supplemental Information: Integrative analysis of human protein, function and disease networks

Wei Liu, Aiping Wu, Matteo Pellegrini & Xiaofan Wang

## Supplementary Tables

Supplementary table 1: List of genes of topological modules

| T_Modules | Gene_name | T_Modules | Gene_name | T_Modules | Gene_name |
|-----------|-----------|-----------|-----------|-----------|-----------|
| Module 1  | ACTG      | Module 47 | CLD4      | Module 90 | ACTN2     |
|           | COF2      |           | CLD3      |           | ADRB1     |
|           | CAP1      |           | CLD7      |           | KCC2A     |
|           | DEST      |           | CXA1      |           | CDK5      |
| Module 2  | RHOA      |           | ZO1       |           | DLG1      |
|           | RND3      |           | CLD5      |           | DLG2      |
|           | GDIR1     |           | CLD8      |           | DLG3      |
|           | ROCK1     |           | CLD6      |           | DLG4      |
|           | RTKN      |           | CLD2      |           | ERBB4     |
| Module 3  | COPD      |           | CLD1      |           | GRIK2     |
|           | COPA      | ZO2       | NMDZ1     |           |           |
|           | COPB      | ZO3       | NMDE1     |           |           |
|           | COPB2     | OCLN      | NMDE2     |           |           |
|           | TMEDA     | Module 48 | HLTF      | NMDE3     |           |
|           | COPE      |           | UBE2N     | NMDE4     |           |
|           | COPZ1     |           | UB2V1     | IL16      |           |
|           | COPG2     |           | UB2V2     | KCNA1     |           |
| Module 4  | CRYAA     | ZNRF2     | KCNA4     |           |           |
|           | CRYAB     | TM189     | IRK2      |           |           |
|           | HSPB1     | Module 49 | ATX3      | IRK4      |           |
|           | HSPB2     |           | UFD1      | IRK10     |           |
|           | HSPB8     |           | TERA      | IRK15     |           |
|           | HSPB6     |           | UBE4B     | MAP1A     |           |
| UBXN1     |           |           | FZD7      |           |           |
| Module 5  | DMD       | ANKZ1     | SYGP1     |           |           |
|           | DTNA      | NPL4      | CD5R1     |           |           |
|           | NOS1      | NSF1C     | DLGP2     |           |           |
|           | SCN5A     | SYVN1     | DLGP1     |           |           |
|           | SNTA1     | Module 50 | RAB3A     | CRIPT     |           |
|           | SNTB1     |           | RAB3B     | LDB3      |           |
|           | SNTB2     |           | 1433F     | NLGN1     |           |
|           | UTRO      |           | RIMS2     | SI1L1     |           |
|           | MAST1     |           | RP3A      | SEM4C     |           |
|           | MAST2     |           | RIMS1     | LIN7B     |           |
|           | VAC14     |           |           |           |           |

|           |       |           |       |            |       |
|-----------|-------|-----------|-------|------------|-------|
| Module 6  | EGLN  | Module 51 | EIF3E | Module 94  | CREB1 |
|           | FKB1A |           | EIF3A |            | CBP   |
|           | TGFB1 |           | EIF3B |            | EP300 |
|           | TGFR1 |           | EIF3C |            | GATA1 |
|           | TGFR2 |           | EIF3D |            | HIF1A |
|           | TGFR3 |           | EIF3F |            | MED1  |
| Module 7  | ERCC2 | Module 52 | EIF3G | Module 95  | RARG  |
|           | ERCC3 |           | EIF3H |            | VHL   |
|           | TF2H2 |           | EIF3I |            | NCOA3 |
|           | TF2H3 |           | EIF3K |            | HDAC4 |
| Module 8  | IF4A1 | Module 53 | EIF3L | Module 96  | CITE2 |
|           | IF4A2 |           | TNR6  |            | EFNB2 |
|           | IF4E  |           | CASP8 |            | EPHB2 |
|           | 4EBP2 |           | TRADD |            | YES   |
| Module 9  | IF4G1 | Module 54 | FADD  | Module 97  | ANDR  |
|           | BL1S1 |           | CFLAR |            | ESR1  |
|           | SNAPN |           | 5HT2C |            | PO2F1 |
|           | BL1S2 |           | SSR3  |            | PO4F1 |
| Module 10 | BL1S3 | Module 55 | MPDZ  | Module 98  | PO4F2 |
|           | CSN1  |           | PKHA2 |            | NCOA2 |
|           | COT1  |           | ADA2B |            | CTBP2 |
|           | CSN3  |           | ADA2C |            | EZH1  |
|           | CSN2  |           | EI2BA |            | EZH2  |
|           | CSN8  |           | EI2BD |            | RBBP4 |
|           | CSN6  |           | EI2BG |            | EED   |
|           | CSN5  |           | EI2BB |            | SUZ12 |
| Module 11 | CSN4  | Module 56 | EI2BE | Module 99  | FOG1  |
|           | HXA9  |           | IL6RB |            | FGF1  |
|           | MEIS1 |           | LEP   |            | FGF2  |
|           | MEIS2 |           | LEPR  |            | FGFR1 |
| Module 12 | PBX1  | Module 57 | SOCS3 | Module 100 | FGFR2 |
|           | GLI1  |           | MAP1S |            | GRB14 |
|           | GLI3  |           | CFTR  |            | FRS2  |
|           | SKI   |           | MOES  |            | GDIB  |
|           | ZIC1  |           | PGFRB |            | RAB8A |
|           | ZIC2  |           | NHRF3 |            | MYO5B |
| Module 13 | ZIC3  | Module 58 | PLCB3 | Module 101 | RAB5A |
|           | GNAO  |           | PTEN  |            | RB11A |
|           | RGS20 |           | NHRF2 |            | RABE1 |
|           | RGS19 |           | NHRF1 |            | OPTN  |
| Module 14 | RIC8A | Module 59 | NRX3A | Module 102 | GNAI2 |
|           | DPOE1 |           | NLGN1 |            | GNAI3 |
|           | DPOE2 |           | NLGN3 |            | GBB1  |
|           | DPOE3 |           | NLGN2 |            | GBB2  |

|           |           |           |            |            |       |
|-----------|-----------|-----------|------------|------------|-------|
|           | CHRC1     |           | PLXB1      |            | GBG3  |
| Module 15 | T2EA      | Module 58 | PLXB3      |            | GBG4  |
|           | T2EB      |           | ARHGB      |            | GBG5  |
|           | TF2H1     |           | ARHGC      |            | GBG7  |
|           |           |           | PLXB2      |            | GBG10 |
| Module 16 | CCNC      | Module 59 | NFE2       | Module 101 | GBG11 |
|           | CDK7      |           | ASPP2      |            | GBG1  |
|           | CDK8      |           | YAP1       |            | NUCB1 |
|           | CSTF2     |           | WBP1       |            | GBB4  |
|           | CSTF3     | Module 60 | ATG12      | Module 102 | GRB10 |
|           | TF2B      |           | ATG7       |            | IGF1R |
|           | NEDD4     |           | GBRAP      |            | ARHGC |
|           | RPB1      |           | GBRL2      |            | PERQ1 |
|           | RPB2      |           | ATG4B      |            | GRIA1 |
|           | RPB3      |           | GBRL1      |            | GRIA2 |
|           | RPB4      |           | ATG3       |            | GRIA3 |
|           | RPAB1     |           | MLP3B      |            | GRIA4 |
|           | RPAB2     | Module 61 | ACTN1      | Module 103 | GRIK1 |
|           | RPB7      |           | DRD3       |            | GRM3  |
|           | RPAB3     |           | PDIA3      |            | GRM7  |
|           | RPB11     |           | GTR1       |            | NSF   |
|           | RPAB4     |           | RGS19      |            | SDC2  |
|           | RPAB5     |           | GIPC1      |            | SDCB1 |
|           | SPT6H     |           | KIF1B      |            | SC6A3 |
|           | TCEA1     |           | CLIC6      |            | ULK1  |
|           | UBA1      | Module 62 | U2AF1      | Module 104 | PICK1 |
|           | WBP2      |           | PRP4       |            | GRIP1 |
|           | RNF11     |           | PRPF3      |            | GRAP1 |
|           | PMEPA     |           | U2AF2      |            | AHR   |
| Module 17 | AAPK1     | Module 63 | PRP31      | Module 103 | ARNT  |
|           | AAPK2     |           | PVRL1      |            | FKBP4 |
|           | AAKB1     |           | PVRL2      |            | GNA12 |
|           | AAKB2     |           | PVRL3      |            | GCR   |
|           | AAKG1     |           | ERF1       |            | HS90A |
| Module 18 | AAKG2     | Module 64 | ERF3A      | Module 103 | PPP5  |
|           | RARA      |           | PCBP1      |            | SIM1  |
|           | RXRA      |           | ERF3B      |            | SIM2  |
|           | THA       |           | PABP1      |            | AIP   |
|           | THB       |           | PAN3       |            | CDC37 |
|           | NRIP1     |           | AP2A2      |            | CHRD1 |
|           | TIF1A     |           | EPS15      |            | H2AX  |
| MED25     | Module 65 | EPN1      | Module 104 | H33        |       |
| Module 19 |           | FINC      |            | POLH       | H33   |
|           |           | ITA6      |            | MD2L2      | SSRP1 |
|           | ITA2      | Module 66 |            |            |       |

|           |       |           |            |            |       |      |
|-----------|-------|-----------|------------|------------|-------|------|
|           | ITA3  |           | POLI       |            | KAT5  |      |
|           | ITA5  |           | POLK       |            | SP16H |      |
|           | ITA7  |           | REV1       |            | ASF1B |      |
|           | ITB1  |           | LSM6       | Module 105 | DCTN1 |      |
|           | NDKA  |           | LSM5       |            | HD    |      |
|           | NDK3  |           | LSM4       |            | SH3G3 |      |
| Module 20 | FBLN2 | Module 67 | LSM1       |            | HAP1  |      |
|           | PGBM  |           | LSM3       | Module 106 | ANXA6 |      |
|           | LAMB1 |           | LSM7       |            | RASH  |      |
|           | LAMC1 |           | LSM2       |            | RASK  |      |
|           | NID1  | RAD17     | PK3CD      |            |       |      |
| NID2      | RFC1  | PK3CG     |            |            |       |      |
| Module 21 | MAD1  | Module 68 | RFC2       |            | RGL2  |      |
|           | MAX   |           | RFC3       | GNDS       |       |      |
|           | MXI1  |           | RFC4       | RASA1      |       |      |
|           | MYC   |           | RFC5       | SHOC2      |       |      |
|           | MYCL1 |           | CTF18      | RGL1       |       |      |
|           | MYCN  | DCC1      | PI3R5      |            |       |      |
|           | SMC3  | UBF1      | RASF5      |            |       |      |
| Module 22 | MAD4  | Module 69 | RPAC1      | Module 107 | BTG1  |      |
|           | MAD3  |           | RPA1       |            | FBRL  |      |
|           | SMN   |           | RPAC2      |            | ANM1  |      |
| Module 23 | SMN   |           | RPA49      |            |       | ILF3 |
|           | RSMB  | Module 70 | CXAR       |            |       | BTG2 |
|           | SMD1  |           | NUMB       |            | HNRPR |      |
|           | SMD2  |           | LNK1       | Module 108 | IGBP1 |      |
|           | SMD3  |           | LNK2       |            | PP4C  |      |
|           | RUXE  | ABL1      | PPP6       |            |       |      |
|           | RUXF  | EPS8      | TIPRL      |            |       |      |
|           | RUXG  | PTN12     | Module 109 | ILK        |       |      |
|           | GEMI2 | PPIP1     |            | LIMS1      |       |      |
|           | WBP4  | ABI1      |            | PARVA      |       |      |
| Module 24 | DDX20 | Module 71 | VINEX      | Module 110 | CADH2 |      |
|           | CDC6  |           | PTN18      |            | EGF   |      |
|           | MCM2  |           | ENAH       |            | EGFR  |      |
|           | MCM3  |           | AP1B1      |            | GHR   |      |
|           | MCM4  |           | AP2B1      |            | INGR2 |      |
|           | MCM5  | AP1G1     | INSR       |            |       |      |
|           | MCM6  | ATM       | IRS1       |            |       |      |
|           | MCM7  | AP1S1     | JAK2       |            |       |      |
|           | ORC1  | AP1S2     | LYN        |            |       |      |
|           | ORC2  | AP1G2     | PDE4A      |            |       |      |
| ORC4      | AP1M1 | PTN1      |            |            |       |      |
| ORC5      | EPN4  | PTN12     |            |            |       |      |

|           |       |           |            |       |       |
|-----------|-------|-----------|------------|-------|-------|
|           | CDC7  |           | AP1M2      |       | SHC1  |
|           | DBF4A | Module 73 | AES        |       | STA5A |
|           | ORC6  |           | HMGB1      |       | STA5B |
|           | ORC3  |           | SIX6       |       | SOCS1 |
|           | GEMI  |           | SIX3       |       | IRS2  |
|           | CDT1  |           | AKT1       |       | DOK2  |
| Module 24 | SYN1  |           | ARRB1      |       | SH2B2 |
|           | SYN2  | ARRB2     |            | SH2B1 |       |
|           | SYN3  | ATF4      |            | SHCBP |       |
|           | CAPON | CCNG1     | Module 111 | ACTN1 |       |
| Module 25 | DLX2  | CHD3      |            | ATF3  |       |
|           | MEOX1 | KC1D      |            | DACH1 |       |
|           | MEOX2 | FKBP3     |            | DAXX  |       |
|           | MSX1  | FOXO1     |            | DTX1  |       |
|           | PAX1  | HMGB1     |            | EF2   |       |
|           | PAX3  | GRP75     |            | FOS   |       |
|           | LHX2  | MDM2      |            | FOSL2 |       |
| Module 26 | IRF5  | M3K5      |            | JUN   |       |
|           | IRF7  | MYB       |            | JUNB  |       |
|           | MYD88 | PEPL      |            | JUND  |       |
|           | TLR4  | PKN2      |            | RSSA  |       |
|           | LY96  | PRKDC     |            | PML   |       |
| Module 27 | CCNA2 | MK10      |            | MK08  |       |
|           | CCNB1 | RL11      | MK09       |       |       |
|           | CCNE1 | STK4      | MK10       |       |       |
|           | CCNH  | P53       | MP2K7      |       |       |
|           | CDC20 | VIME      | RAGP1      |       |       |
|           | CDK2  | TOPRS     | RL3        |       |       |
|           | CDKN3 | HIPK2     | RS3        |       |       |
|           | CKS1  | PIAS4     | RS21       |       |       |
|           | DNMT1 | NLK       | SUMO3      |       |       |
|           | FLNA  | TRIB3     | SUMO2      |       |       |
|           | FLNB  | SIN1      | TOP1       |       |       |
|           | HDAC1 | T53I1     | TOP2A      |       |       |
|           | HES1  | RICTR     | TOP2B      |       |       |
|           | MARK3 | AMPH      | UBC9       |       |       |
|           | MAT1  | BIN1      | SUMO1      |       |       |
|           | GA45B | ARF1      | FOSL1      |       |       |
|           | NP1L4 | CLH1      | C8AP2      |       |       |
|           | RBBP7 | DYN1      | SAE2       |       |       |
|           | RBL1  | HIP1      | SAE1       |       |       |
|           | BRD2  | SH3G1     | RASF1      |       |       |
| SUV91     | SH3G2 | IKZF3     |            |       |       |
| TAF1      | CLH2  | JIP3      |            |       |       |

|          |           |            |            |       |
|----------|-----------|------------|------------|-------|
| TAF2     |           | SNX4       |            | CBLC  |
| TLE1     |           | ADAM9      |            | KLC2  |
| TLE2     |           | SYNJ1      |            | ITCH  |
| 1433Z    |           | PDC6I      |            | TRI63 |
| CAF1B    |           | PDCD6      |            | DUS19 |
| HIST1H4I |           | EPN2       | Module 112 | ATR   |
| H2B2E    |           | GGA3       |            | GA45A |
| HIST1H3A |           | GGA1       |            | FEN1  |
| HIST1H3D |           | SHLB1      |            | MSH6  |
| HIST1H3C |           | PACS1      |            | DNLI1 |
| HIST1H3E | Module 76 | APC        |            | MSH2  |
| HIST1H3I |           | CADH5      |            | MSH3  |
| HIST1H3G |           | CTBP1      |            | PCNA  |
| HIST1H3J |           | CTNA1      |            | DPOD1 |
| HIST1H3H |           | CTNB1      |            | DPOD2 |
| HIST1H3B |           | DSC1       |            | POLH  |
| HIST1H4A |           | DSG1       |            | UBE2A |
| HIST1H4D |           | EVI1       |            | UBE2B |
| HIST1H4F |           | GSK3B      |            | GA45G |
| HIST1H4K |           | HIC1       |            | APEX2 |
| HIST1H4J |           | PLAK       |            | RAD18 |
| HIST1H4C |           | PSN1       |            | DPOD4 |
| HIST1H4H |           | PSN2       |            | SETD8 |
| HIST1H4B |           | PTPRB      | BCL3       |       |
| HIST1H4E |           | TF7L2      | GFI1       |       |
| HIST1H4L |           | ZEB1       | NFKB1      |       |
| HIST2H4A |           | ICAM5      | NFKB2      |       |
| SMCA5    |           | RUVB2      | IKBA       |       |
| HAT1     | MARE1     | Module 113 | IKBB       |       |
| CCNA1    | KIFA3     | IKBE       |            |       |
| H31      | APH1A     | TF65       |            |       |
| CCNB2    | LEF1      | RELB       |            |       |
| CCNE2    | CNBP1     | PIAS3      |            |       |
| TIF1B    | BMAL1     | IKBZ       |            |       |
| CBX1     | Module 77 | EPAS1      | JAG1       |       |
| TLK2     |           | VHL        | SUH        |       |
| CBX3     |           | CLOCK      | Module 114 | NOTC1 |
| CBX5     | Module 78 | BAG1       | SNW1       |       |
| BRD4     |           | HSP71      | DLL1       |       |
| ASF1A    |           | HSP71      | SYF1       |       |
| REM1     |           | AIFM1      | COF1       |       |
| TBL1R    | Module 79 | CCND1      | Module 115 | G3P   |
| CCNB3    |           | CCND2      | LIS1       |       |
| HIST4H4  |           | CCND3      | PA1B2      |       |

|           |          |           |       |            |       |
|-----------|----------|-----------|-------|------------|-------|
|           | HIST2H4B |           | CDK4  |            | PA1B3 |
| Module 28 | CDX2     |           | CDK6  |            | PGK1  |
|           | GFI1     |           | CDN1A |            | UBA1  |
|           | MITF     |           | CDN1B |            | HS105 |
|           | PAX6     |           | CDN2D |            | DISC1 |
|           | PIAS3    |           | CEBPB |            | NDEL1 |
|           | RX       |           | ANM2  |            | PRKN2 |
|           | VSX2     |           | RB    |            | RBP2  |
| Module 29 | ARPC5    |           | HMGA2 | Module 116 | UB2G1 |
|           | ARPC4    |           | RBBP9 |            | UB2L3 |
|           | ARPC3    |           | BAD   |            | SNCAP |
|           | ARC1B    |           | BAK   |            | ARI2  |
|           | ARPC2    |           | BAX   |            | ADA2A |
| Module 30 | SLU7     |           | BCL2  |            | DRD2  |
|           | PRP8     |           | B2LA1 |            | NEK2  |
|           | U520     |           | B2CL1 |            | PP1A  |
|           | PRP6     |           | B2CL2 |            | PP1G  |
| Module 31 | DKC1     | Module 80 | BID   | Module 117 | IPP2  |
|           | TF2AA    |           | BIK   |            | PP1R8 |
|           | T2AG     |           | GRID2 |            | RGS2  |
|           | TF2H4    |           | MCL1  |            | STAU1 |
|           | TF3B     |           | PDPK1 |            | ASPP2 |
|           | PIN1     |           | PK3C3 |            | WBP11 |
|           | SPT4H    |           | KAPCA |            | NEB1  |
|           | SPT5H    |           | PTN4  |            | NEB2  |
|           | TAF5     |           | BECN1 |            | TLX1  |
|           | TAF6     |           | B2L11 |            | PP2AA |
|           | TAF10    | SIVA      | PP2AB |            |       |
|           | TAF11    | 1433T     | 2AAA  |            |       |
|           | TAF12    | BBC3      | 2AAB  |            |       |
|           | TAF13    | GOPC      | 2ABA  |            |       |
|           | TBP      | BMF       | 2A5A  |            |       |
|           | SYMPK    | DYL2      | M3K3  |            |       |
|           | RUVB1    | CAC1C     | MP2K5 |            |       |
|           | EDF1     | CALM      | SQSTM |            |       |
|           | TAF1C    | CALM      | SH22A |            |       |
|           | TAF1B    | CALM      | M3K2  |            |       |
| TAF1A     | GRB7     | ADRB3     |       |            |       |
| BTAF1     | KCNN2    | CRK       |       |            |       |
| SSU72     | KCNQ2    | DCC       |       |            |       |
| TAF9B     | KCC1A    | DOCK1     |       |            |       |
| TAF8      | KKCC2    | DOCK3     |       |            |       |
| Module 32 | RCAN1    | Module 82 | MTG16 |            | FAK2  |
|           | PP2BA    |           | ID1   |            | ITB5  |

|           |       |           |       |            |       |
|-----------|-------|-----------|-------|------------|-------|
|           | CANB1 |           | ID2   |            | LCK   |
|           | CABP1 |           | ID3   |            | NEO1  |
|           | RCAN2 |           | LYL1  |            | NPHP1 |
|           | CABP2 |           | MYOD1 |            | FAK1  |
|           | CABP5 |           | TAL1  |            | PAXI  |
| Module 33 | KAP0  |           | ITF2  |            | SRC   |
|           | KAP2  |           | TFE2  |            | TGFI1 |
|           | AKAP4 |           | HTF4  |            | VINC  |
|           | AKAP5 |           | TCF21 |            | ADA15 |
|           | AKAP9 |           | TWST1 |            | BCAR1 |
|           | AKAP3 |           | HAND2 |            | 3BP1  |
|           | AKAP2 |           | BCR   |            | ATR   |
|           | SP17  |           | BTK   |            | BLM   |
| ROP1A     |       | CAV3      |       | BRCA2      |       |
| Module 34 | DUS1  |           | CBL   | Module 121 | RAD51 |
|           | DUS4  |           | CBLB  |            | RAD52 |
|           | DUS6  |           | CD3E  |            | RFA1  |
|           | ELK1  |           | MPIP3 |            | RFA2  |
|           | MKNK2 |           | CRKL  |            | R51A1 |
|           | MBP   |           | CSF1R |            | NSF   |
|           | M3K1  |           | DAG1  | PLD1       |       |
|           | RASN  |           | DYN2  | SNP25      |       |
|           | MK01  |           | DOK1  | STX1A      |       |
|           | MK03  |           | SRC8  | STX3       |       |
|           | MP2K1 |           | EPOR  | STX4       |       |
|           | MP2K2 |           | ERBB2 | STX5       |       |
|           | PTPRR |           | ERBB3 | STXB1      |       |
|           | RAF1  | Module 83 | FGR   | STXB2      |       |
|           | KS6A1 |           | VGFR1 | STXB3      |       |
|           | MKNK1 |           | FYB   | VAMP1      |       |
|           | KS6A4 |           | FYN   | VAMP2      |       |
|           | PTN5  |           | GAB1  | SYT1       |       |
|           | GRB2  |           | STX7  |            |       |
| Module 35 | PSA1  |           | RPGF1 | Module 122 | SNP23 |
|           | PSA2  |           | HCK   |            | SNAA  |
|           | PSA3  |           | HCLS1 |            | VAMP3 |
|           | PSA4  |           | HNRPK |            | SNP29 |
|           | PSA5  |           | SHIP1 |            | GOSR1 |
|           | PSA6  |           | IRS1  |            | CPLX1 |
|           | PSA7  |           | ITK   |            | EHD1  |
|           | PSB1  |           | KIT   |            | STX12 |
|           | PSB2  |           | LAMA2 |            | EHD3  |
|           | PSB3  |           | LAMA5 |            | STX1B |
|           | PSB4  |           | LCP2  |            | TRIM9 |
|           | PSB5  |           |       |            |       |

|           |            |       |       |
|-----------|------------|-------|-------|
|           | PSB6       | SH21A | STXB5 |
|           | PSB7       | TAU   | BIRC2 |
|           | PSB8       | NCK1  | BIRC3 |
|           | PSB9       | NPHN  | CD27  |
|           | PSB10      | NTF3  | TNR5  |
|           | PRP19      | NTRK2 | TNR9  |
| Module 36 | PRS4       | NTRK3 | IRAK1 |
|           | PRS7       | CNRG  | TNR3  |
|           | PRS6A      | PK3CA | TNAP3 |
|           | PRS6B      | P85A  | TRAF1 |
|           | PRS8       | PLCG1 | TRAF2 |
|           | PRS10      | PLK1  | TRAF3 |
|           | PSMD1      | PTN6  | TRAF5 |
|           | PSMD2      | PTN11 | TRAF6 |
|           | PSMD4      | PTPRA | TNR4  |
|           | PSD7       | RET   | TNR11 |
|           | PSMD8      | ITSN1 | TBKB1 |
|           | PSMD9      | SLAF1 | TANK  |
|           | PSD10      | SOS1  | CIKS  |
|           | PSD11      | SOS2  | TBK1  |
|           | PSD12      | STA5A | PELI2 |
|           | PSD13      | KSYK  | MAVS  |
|           | RD23A      | TPD53 | CADH1 |
|           | RD23B      | VAV   | RNF4  |
|           | XPC        | WASP  | SIAH1 |
|           | UBP14      | WIPF1 | UB2D2 |
| Module 37 | PSMD6      | 1433B | UB2D3 |
|           | PSDE       | 1433E | APC10 |
|           | ADRM1      | PODO  | PUF60 |
|           | UCHL5      | P55G  | ANC2  |
|           | PAAF1      | SYNJ2 | APC11 |
|           | RAB4A      | SKAP2 | OTUB1 |
|           | KIF3B      | WASL  | RNF25 |
|           | CD2AP      | HIP1R | AFAD  |
|           | RUFY1      | CIP4  | SRBS2 |
|           | Module 38  | MYO5A | GRAP2 |
| RAB3A     |            | M4K4  | JAM1  |
| RB27A     |            | GAB2  | DC111 |
| RB27B     |            | TM1L1 | GLRB  |
| SYTL2     |            | ARP3  | DYLT1 |
| MELPH     |            | SF3B4 | DYL1  |
| SYTL1     |            | KHDR1 | GEPH  |
| SYTL4     |            | FRS2  | PPARG |
| SYTL5     |            | SF3B2 | HDAC3 |
|           | Module 123 |       |       |
|           | Module 124 |       |       |
|           | Module 125 |       |       |
|           | Module 126 |       |       |
|           | Module 127 |       |       |

|           |           |           |           |            |           |
|-----------|-----------|-----------|-----------|------------|-----------|
| Module 39 | RCC1      | Module 84 | M4K1      | Module 128 | NCOR2     |
|           | XPO2      |           | AATF      |            | HDAC5     |
|           | SYDC      |           | LAT       |            | PAK2      |
|           | EF1A1     |           | BLNK      |            | SPTA2     |
|           | IF5A1     |           | SH3K1     |            | SPTB2     |
|           | IMA1      |           | ITSN2     |            | SSR2      |
|           | IMB1      |           | ERRFI     |            | ARHG7     |
|           | IMA2      |           | DOK5      |            | ARHG6     |
|           | IMA4      |           | EP15R     |            | SHAN2     |
|           | TNPO1     |           | SHKB1     |            | GIT1      |
|           | IPO5      |           | BCAP      |            | SHAN1     |
|           | RAN       |           | CD2       |            | SHRPN     |
|           | RANG      |           | CD48      |            | TS101     |
|           | RBP2      |           | CD2B2     |            | STAM1     |
|           | RAGP1     |           | RHG01     |            | UBP8      |
|           | RL7       |           | GDIR1     |            | HGS       |
|           | UB2E1     |           | GDIR3     |            | STAM2     |
|           | XPO1      |           | C1QBP     |            | STABP     |
|           | AIMP2     |           | CDC42     |            | VPS28     |
|           | NTF2      |           | PAK1      |            | KC1E      |
|           | UB2E3     |           | PAK3      |            | DVL2      |
|           | IPO7      |           | KPCI      |            | BAG3      |
|           | NUP50     |           | KPCZ      |            | CLUS      |
|           | IMA7      |           | RAC1      |            | GNA12     |
|           | MOG1      |           | 1433G     |            | HSP74     |
|           | IPO11     |           | MRCKA     |            | HSP7C     |
|           | XPO5      |           | WASF1     |            | HS90A     |
|           | Module 40 |           | BMI1      |            | Module 85 |
| BTF3      |           | WASF2     | PPID      |            |           |
| CSK21     |           | BAIP2     | PPP5      |            |           |
| CSK22     |           | IQGA2     | PRIO      |            |           |
| CSK2B     |           | PAR6A     | SGTA      |            |           |
| E2F6      |           | PARD3     | SIM1      |            |           |
| IF2A      |           | RHOJ      | AIP       |            |           |
| IF2G      |           | PAR6G     | BAG2      |            |           |
| IF5       |           | PAR6B     | STIP1     |            |           |
| FHL1      |           | BORG3     | CDC37     |            |           |
| RING1     |           | IKKA      | CHRD1     |            |           |
| RING2     |           | IKKB      | TNFL6     |            |           |
| LA        |           | NEMO      | PACN2     |            |           |
| PCGF2     |           | KEAP1     | PACN3     |            |           |
| UBP7      |           | ATF2      | PACN1     |            |           |
| Module 40 |           | CBX4      | Module 87 | MK14       |           |
|           | IF2B      | MK11      |           | SORL       |           |

|           |           |           |           |            |            |       |
|-----------|-----------|-----------|-----------|------------|------------|-------|
|           | AKA12     |           | MP2K4     |            | GGA2       |       |
|           | PCGF3     |           | MAPK3     | Module 134 | HDAC2      |       |
|           | RYBP      |           | MKNK1     |            | SAP30      |       |
|           | CBX7      |           | KS6A5     |            | NCOR1      |       |
|           | CBX8      |           | MAPK2     |            | SIN3B      |       |
|           | LMBL2     |           | JDP2      |            | SIN3A      |       |
|           | PCGF6     |           | APBA2     |            | SDS3       |       |
|           | PCGF5     | Module 88 | APBB1     | Module 135 | VPS4B      |       |
|           | CBX2      |           | APLP1     |            | CHM2A      |       |
|           | PCGF1     |           | APLP2     |            | CHMP3      |       |
| Module 41 | RS2       |           | A4        |            | CHMP6      |       |
|           | RS3       |           | DAB1      |            | CHM4B      |       |
|           | RS4X      |           | KINH      | AVR2B      |            |       |
|           | RS11      |           | KLC1      | REPS2      |            |       |
|           | ANM3      |           | LDLR      | GDF11      |            |       |
| Module 42 | UB2R1     |           | Module 88 | LRP1       | Module 136 | RBP1  |
|           | CKS1      |           |           | M3K11      |            | SYJ2B |
|           | NEDD8     | VLDLR     |           |            |            |       |
|           | SKP1      | M3K12     |           |            |            |       |
|           | SKP2      | LRP8      |           |            |            |       |
|           | CUL5      | JIP1      |           |            |            |       |
|           | CUL3      | APBA3     |           |            |            |       |
|           | CUL1      | SNX17     |           |            |            |       |
|           | ULA1      | APBB3     |           |            |            |       |
|           | UBA3      | JIP2      |           |            |            |       |
|           | UBC12     | Module 89 | APBA1     |            |            |       |
|           | RBX2      |           | AT2B4     |            |            |       |
|           | RBX1      |           | CAC1B     |            |            |       |
|           | SUGT1     |           | IRK12     |            |            |       |
|           | FBXL6     |           | SDC2      |            |            |       |
|           | DCNL1     |           | CSKP      |            |            |       |
|           | KCTD5     |           | LIN7A     |            |            |       |
|           | FBXW5     |           | LIN7C     |            |            |       |
|           | FBXW7     |           | CP070     |            |            |       |
| FBXL8     | CNTP4     |           |           |            |            |       |
| KDM2B     | Module 91 | DVL1      |           |            |            |       |
| SENP8     |           | DVL3      |           |            |            |       |
| Module 43 |           | MECP2     | SMAD1     |            |            |       |
|           |           | SMCA2     | SMAD3     |            |            |       |
|           |           | SMCA4     | SMAD4     |            |            |       |
|           | SNF5      | SMAD6     |           |            |            |       |
|           | SMRC1     | SMAD7     |           |            |            |       |
|           | SMRC2     | LAP2      |           |            |            |       |
|           | ARI1A     | SMUF1     |           |            |            |       |

|           |       |           |       |  |  |
|-----------|-------|-----------|-------|--|--|
|           | ARI1B |           | KLH12 |  |  |
| Module 44 | JAK1  | Module 92 | KLF6  |  |  |
|           | KPCD  |           | E2F1  |  |  |
|           | STAT3 |           | NECD  |  |  |
|           | NDUAD |           | NFYA  |  |  |
| Module 45 | PPM1B |           | NFYB  |  |  |
|           | MP2K6 |           | NFYC  |  |  |
|           | M3K7  |           | TNR16 |  |  |
|           | TAB1  |           | SP1   |  |  |
|           | TAB2  |           | TFDP1 |  |  |
| Module 46 | ELOC  |           | TFDP2 |  |  |
|           | ELOB  |           | MAGG1 |  |  |
|           | CUL2  |           | EFNB1 |  |  |
|           | SOCS1 | PTN13     |       |  |  |
|           | ZER1  | NCK2      |       |  |  |

T\_Modules denotes index of Topological modules.

Supplementary table 2: Summary of GO function enrichment analysis of topological modules.

| T_Module        | Item Description                      | corr p-value | hit | total | GO_Category |
|-----------------|---------------------------------------|--------------|-----|-------|-------------|
| Module 1        | non-membrane-bounded organelle        | 5.34E-03     | 4   | 4     | CC          |
| Module 2        | signaling pathway                     | 1.08E-03     | 5   | 5     | BP          |
|                 | signal transmission                   | 1.08E-03     | 5   | 5     | BP          |
|                 | signaling process                     | 1.08E-03     | 5   | 5     | BP          |
|                 | regulation of biological process      | 4.63E-02     | 5   | 5     | BP          |
| Module 3        | vesicle-mediated transport            | 2.90E-11     | 8   | 8     | BP          |
|                 | establishment of protein localization | 2.01E-10     | 8   | 8     | BP          |
|                 | establishment of localization in cell | 5.03E-10     | 8   | 8     | BP          |
|                 | cellular localization                 | 1.21E-09     | 8   | 8     | BP          |
|                 | macromolecule localization            | 3.26E-09     | 8   | 8     | BP          |
|                 | transport                             | 2.20E-06     | 8   | 8     | BP          |
|                 | establishment of localization         | 2.36E-06     | 8   | 8     | BP          |
|                 | cytoplasmic vesicle                   | 3.15E-11     | 8   | 8     | CC          |
|                 | vesicle                               | 4.17E-11     | 8   | 8     | CC          |
|                 | endomembrane system                   | 1.02E-08     | 8   | 8     | CC          |
|                 | organelle membrane                    | 8.20E-08     | 8   | 8     | CC          |
|                 | intracellular organelle part          | 1.38E-04     | 8   | 8     | CC          |
|                 | organelle part                        | 1.48E-04     | 8   | 8     | CC          |
|                 | membrane part                         | 8.17E-04     | 8   | 8     | CC          |
|                 | membrane                              | 3.10E-03     | 8   | 8     | CC          |
|                 | membrane-bounded organelle            | 8.49E-03     | 8   | 8     | CC          |
|                 | intracellular organelle               | 1.76E-02     | 8   | 8     | CC          |
| protein binding | 3.22E-02                              | 8            | 8   | MF    |             |
| Module 4        | response to abiotic stimulus          | 3.44E-08     | 6   | 6     | BP          |

|                |                                             |          |    |    |    |
|----------------|---------------------------------------------|----------|----|----|----|
|                | response to stress                          | 1.24E-04 | 6  | 6  | BP |
| Module 5       | membrane                                    | 1.06E-03 | 11 | 11 | CC |
|                | protein binding                             | 1.33E-02 | 11 | 11 | MF |
| Module 6       | anatomical structure morphogenesis          | 2.40E-05 | 6  | 6  | BP |
|                | signaling pathway                           | 1.71E-04 | 6  | 6  | BP |
|                | anatomical structure development            | 4.50E-04 | 6  | 6  | BP |
|                | multicellular organismal development        | 7.00E-04 | 6  | 6  | BP |
|                | regulation of biological process            | 1.78E-02 | 6  | 6  | BP |
|                | protein binding                             | 3.22E-02 | 6  | 6  | MF |
| Module 7       | protein complex biogenesis                  | 1.79E-05 | 4  | 4  | BP |
|                | macromolecular complex subunit organization | 5.81E-05 | 4  | 4  | BP |
|                | cellular component assembly                 | 1.32E-04 | 4  | 4  | BP |
|                | cellular response to stimulus               | 1.70E-04 | 4  | 4  | BP |
|                | catabolic process                           | 1.78E-04 | 4  | 4  | BP |
|                | response to stress                          | 1.32E-03 | 4  | 4  | BP |
|                | biosynthetic process                        | 1.33E-03 | 4  | 4  | BP |
|                | nitrogen compound metabolic process         | 2.67E-03 | 4  | 4  | BP |
|                | macromolecule metabolic process             | 1.56E-02 | 4  | 4  | BP |
|                | cellular metabolic process                  | 2.81E-02 | 4  | 4  | BP |
|                | primary metabolic process                   | 3.31E-02 | 4  | 4  | BP |
|                | organelle lumen                             | 3.12E-04 | 4  | 4  | CC |
|                | protein complex                             | 1.23E-03 | 4  | 4  | CC |
|                | intracellular organelle part                | 1.24E-02 | 4  | 4  | CC |
| organelle part | 1.24E-02                                    | 4        | 4  | CC |    |
| Module 8       | protein complex                             | 2.76E-03 | 4  | 4  | CC |
|                | nucleic acid binding                        | 2.11E-02 | 4  | 5  | MF |
| Module 9       | cellular pigmentation                       | 4.01E-07 | 3  | 4  | BP |
|                | vesicle-mediated transport                  | 3.64E-03 | 3  | 4  | BP |
|                | establishment of localization in cell       | 7.83E-03 | 3  | 4  | BP |
|                | cellular localization                       | 9.80E-03 | 3  | 4  | BP |
|                | organelle organization                      | 2.02E-02 | 3  | 4  | BP |
| Module 10      | membrane-bounded organelle                  | 9.68E-03 | 8  | 8  | CC |
|                | intracellular organelle                     | 1.77E-02 | 8  | 8  | CC |
| Module 11      | multicellular organismal development        | 2.85E-02 | 4  | 4  | BP |
|                | transcription factor activity               | 1.21E-04 | 4  | 4  | MF |
|                | nucleic acid binding                        | 5.56E-03 | 4  | 4  | MF |
| Module 12      | anatomical structure morphogenesis          | 1.67E-05 | 6  | 6  | BP |
|                | anatomical structure development            | 5.25E-04 | 6  | 6  | BP |
|                | multicellular organismal development        | 8.19E-04 | 6  | 6  | BP |
|                | ion binding                                 | 1.16E-03 | 6  | 6  | MF |
|                | protein binding                             | 3.85E-02 | 6  | 6  | MF |
| Module 13      | signal transducer activity                  | 4.15E-02 | 3  | 4  | MF |
| Module 14      | transferase activity                        | 4.78E-04 | 4  | 4  | MF |

|                    |                                                 |          |    |    |    |
|--------------------|-------------------------------------------------|----------|----|----|----|
|                    | nucleic acid binding                            | 5.33E-03 | 4  | 4  | MF |
| Module 15          | protein complex biogenesis                      | 3.98E-04 | 3  | 3  | BP |
|                    | macromolecular complex subunit organization     | 9.68E-04 | 3  | 3  | BP |
|                    | cellular component assembly                     | 1.79E-03 | 3  | 3  | BP |
|                    | biosynthetic process                            | 8.10E-03 | 3  | 3  | BP |
|                    | nitrogen compound metabolic process             | 1.35E-02 | 3  | 3  | BP |
|                    | macromolecule metabolic process                 | 4.74E-02 | 3  | 3  | BP |
|                    | organelle lumen                                 | 3.33E-03 | 3  | 3  | CC |
|                    | RNA polymerase II transcription factor activity | 4.70E-05 | 3  | 3  | MF |
| Module 16          | cellular metabolic process                      | 1.36E-06 | 21 | 24 | BP |
|                    | primary metabolic process                       | 4.07E-06 | 21 | 24 | BP |
|                    | intracellular organelle                         | 9.92E-04 | 21 | 24 | CC |
|                    | intracellular part                              | 1.72E-02 | 21 | 24 | CC |
|                    | intracellular                                   | 2.85E-02 | 21 | 24 | CC |
| Module 17          | small molecule metabolic process                | 9.29E-06 | 6  | 6  | BP |
|                    | biosynthetic process                            | 4.07E-05 | 6  | 6  | BP |
|                    | signal transmission                             | 1.02E-04 | 6  | 6  | BP |
|                    | signaling process                               | 1.02E-04 | 6  | 6  | BP |
|                    | cellular metabolic process                      | 6.06E-03 | 6  | 6  | BP |
|                    | primary metabolic process                       | 8.20E-03 | 6  | 6  | BP |
|                    | regulation of biological process                | 2.32E-02 | 6  | 6  | BP |
|                    | protein binding                                 | 2.74E-02 | 6  | 6  | MF |
| Module 18          | regulation of biological process                | 1.76E-02 | 7  | 7  | BP |
| Module 19          | protein complex                                 | 1.02E-04 | 8  | 9  | CC |
|                    | cell adhesion                                   | 1.57E-06 | 7  | 9  | BP |
|                    | anatomical structure development                | 2.25E-03 | 7  | 9  | BP |
|                    | multicellular organismal development            | 4.26E-03 | 7  | 9  | BP |
|                    | protein binding                                 | 3.08E-02 | 8  | 9  | MF |
| Module 20          | extracellular matrix                            | 5.46E-10 | 6  | 6  | CC |
|                    | extracellular region part                       | 2.61E-07 | 6  | 6  | CC |
| Module 21          | membrane-bounded organelle                      | 3.27E-02 | 9  | 9  | CC |
|                    | intracellular organelle                         | 3.96E-02 | 9  | 9  | CC |
| Module 22          | nitrogen compound metabolic process             | 3.65E-09 | 11 | 11 | BP |
|                    | macromolecule metabolic process                 | 2.51E-06 | 11 | 11 | BP |
|                    | cellular metabolic process                      | 2.63E-05 | 11 | 11 | BP |
|                    | primary metabolic process                       | 4.81E-05 | 11 | 11 | BP |
|                    | ribonucleoprotein complex                       | 2.40E-16 | 11 | 11 | CC |
|                    | organelle lumen                                 | 5.58E-11 | 11 | 11 | CC |
|                    | intracellular organelle part                    | 3.70E-06 | 11 | 11 | CC |
|                    | organelle part                                  | 4.00E-06 | 11 | 11 | CC |
|                    | membrane-bounded organelle                      | 1.01E-03 | 11 | 11 | CC |
|                    | intracellular organelle                         | 3.14E-03 | 11 | 11 | CC |
| intracellular part | 1.68E-02                                        | 11       | 11 | CC |    |

|           |                                                        |          |    |    |    |
|-----------|--------------------------------------------------------|----------|----|----|----|
|           | intracellular                                          | 2.29E-02 | 11 | 11 | CC |
|           | protein binding                                        | 1.13E-02 | 11 | 11 | MF |
| Module 23 | organelle lumen                                        | 1.50E-16 | 17 | 17 | CC |
|           | intracellular organelle part                           | 4.17E-09 | 17 | 17 | CC |
|           | organelle part                                         | 4.84E-09 | 17 | 17 | CC |
|           | membrane-bounded organelle                             | 3.33E-05 | 17 | 17 | CC |
|           | intracellular organelle                                | 1.78E-04 | 17 | 17 | CC |
|           | intracellular part                                     | 2.35E-03 | 17 | 17 | CC |
|           | intracellular                                          | 3.75E-03 | 17 | 17 | CC |
|           | protein binding                                        | 4.97E-05 | 17 | 17 | MF |
| Module 24 | signal release                                         | 9.79E-07 | 3  | 3  | BP |
|           | generation of a signal involved in cell-cell signaling | 9.79E-07 | 3  | 3  | BP |
|           | secretion by cell                                      | 1.28E-05 | 3  | 3  | BP |
|           | cell-cell signaling                                    | 1.79E-04 | 3  | 3  | BP |
|           | cell communication                                     | 4.31E-04 | 3  | 3  | BP |
|           | establishment of localization in cell                  | 4.77E-04 | 3  | 3  | BP |
|           | cellular localization                                  | 6.35E-04 | 3  | 3  | BP |
|           | system process                                         | 2.02E-03 | 3  | 3  | BP |
|           | regulation of biological quality                       | 2.03E-03 | 3  | 3  | BP |
|           | signal transmission                                    | 4.95E-03 | 3  | 3  | BP |
|           | signaling process                                      | 4.95E-03 | 3  | 3  | BP |
|           | transport                                              | 7.90E-03 | 3  | 3  | BP |
|           | establishment of localization                          | 7.90E-03 | 3  | 3  | BP |
|           | synaptic vesicle                                       | 6.25E-06 | 3  | 3  | CC |
|           | synapse part                                           | 5.38E-05 | 3  | 3  | CC |
|           | cytoplasmic vesicle                                    | 3.18E-04 | 3  | 3  | CC |
| vesicle   | 3.30E-04                                               | 3        | 3  | CC |    |
|           | nucleoside binding                                     | 1.42E-02 | 3  | 4  | MF |
| Module 25 | regulation of biological process                       | 1.57E-02 | 7  | 7  | BP |
|           | membrane-bounded organelle                             | 3.30E-02 | 7  | 7  | CC |
|           | intracellular organelle                                | 4.30E-02 | 7  | 7  | CC |
|           | nucleic acid binding                                   | 6.21E-05 | 7  | 7  | MF |
| Module 26 | regulation of biological process                       | 4.03E-02 | 5  | 5  | BP |
| Module 27 | intracellular organelle                                | 1.42E-07 | 41 | 45 | CC |
|           | intracellular part                                     | 3.73E-06 | 42 | 45 | CC |
|           | intracellular                                          | 1.10E-05 | 42 | 45 | CC |
|           | cell part                                              | 4.75E-02 | 43 | 45 | CC |
|           | protein binding                                        | 5.59E-08 | 42 | 45 | MF |
| Module 28 | regulation of biological process                       | 1.75E-02 | 7  | 7  | BP |
|           | nucleic acid binding                                   | 2.13E-04 | 7  | 7  | MF |
| Module 29 | non-membrane-bounded organelle                         | 3.70E-04 | 5  | 5  | CC |
|           | protein complex                                        | 4.54E-04 | 5  | 5  | CC |
|           | intracellular organelle part                           | 6.98E-03 | 5  | 5  | CC |

|           |                                     |          |    |    |    |
|-----------|-------------------------------------|----------|----|----|----|
|           | organelle part                      | 6.98E-03 | 5  | 5  | CC |
| Module 30 | nitrogen compound metabolic process | 2.05E-03 | 4  | 4  | BP |
|           | macromolecule metabolic process     | 1.59E-02 | 4  | 4  | BP |
|           | cellular metabolic process          | 3.56E-02 | 4  | 4  | BP |
|           | primary metabolic process           | 4.35E-02 | 4  | 4  | BP |
|           | ribonucleoprotein complex           | 6.38E-06 | 4  | 4  | CC |
|           | intracellular organelle part        | 1.75E-02 | 4  | 4  | CC |
|           | organelle part                      | 1.75E-02 | 4  | 4  | CC |
| Module 31 | membrane-bounded organelle          | 1.76E-07 | 25 | 25 | CC |
|           | intracellular organelle             | 2.46E-06 | 25 | 25 | CC |
|           | intracellular part                  | 1.18E-04 | 25 | 25 | CC |
|           | intracellular                       | 2.51E-04 | 25 | 25 | CC |
| Module 32 | signal transmission                 | 7.09E-03 | 5  | 7  | BP |
|           | signaling process                   | 7.09E-03 | 5  | 7  | BP |
|           | ion binding                         | 4.58E-02 | 5  | 7  | MF |
| Module 33 | signal transmission                 | 5.21E-04 | 7  | 8  | BP |
|           | signaling process                   | 5.21E-04 | 7  | 8  | BP |
| Module 34 | regulation of biological process    | 8.75E-05 | 16 | 18 | BP |
|           | protein binding                     | 1.51E-03 | 16 | 18 | MF |
| Module 35 | macromolecule metabolic process     | 3.32E-10 | 18 | 18 | BP |
|           | cellular metabolic process          | 1.53E-08 | 18 | 18 | BP |
|           | primary metabolic process           | 4.30E-08 | 18 | 18 | BP |
|           | regulation of biological process    | 1.97E-06 | 18 | 18 | BP |
|           | protein complex                     | 4.15E-14 | 18 | 18 | CC |
|           | membrane-bounded organelle          | 2.54E-05 | 18 | 18 | CC |
|           | intracellular organelle             | 1.54E-04 | 18 | 18 | CC |
|           | intracellular part                  | 2.50E-03 | 18 | 18 | CC |
| Module 36 | intracellular                       | 4.10E-03 | 18 | 18 | CC |
|           | intracellular part                  | 3.41E-04 | 25 | 25 | CC |
|           | intracellular                       | 6.48E-04 | 25 | 25 | CC |
| Module 38 | protein binding                     | 3.53E-06 | 25 | 25 | MF |
|           | transport                           | 3.04E-06 | 9  | 9  | BP |
| Module 39 | establishment of localization       | 3.17E-06 | 9  | 9  | BP |
|           | intracellular part                  | 1.18E-04 | 27 | 27 | CC |
| Module 40 | intracellular                       | 2.30E-04 | 27 | 27 | CC |
|           | intracellular part                  | 2.20E-04 | 25 | 25 | CC |
|           | intracellular                       | 4.03E-04 | 25 | 25 | CC |
| Module 41 | protein binding                     | 1.94E-05 | 26 | 27 | MF |
|           | biosynthetic process                | 1.47E-02 | 4  | 5  | BP |
|           | ribonucleoprotein complex           | 2.64E-05 | 4  | 5  | CC |
|           | non-membrane-bounded organelle      | 9.19E-03 | 4  | 5  | CC |
|           | structural constituent of ribosome  | 2.25E-06 | 4  | 5  | MF |
|           | nucleic acid binding                | 2.93E-02 | 4  | 5  | MF |
|           | macromolecule metabolic process     | 4.96E-02 | 4  | 5  | BP |

|           |                                       |          |    |    |    |
|-----------|---------------------------------------|----------|----|----|----|
| Module 42 | protein binding                       | 1.16E-04 | 20 | 22 | MF |
| Module 43 | regulation of biological process      | 4.01E-03 | 8  | 8  | BP |
|           | intracellular organelle part          | 2.40E-04 | 8  | 8  | CC |
|           | organelle part                        | 2.40E-04 | 8  | 8  | CC |
|           | membrane-bounded organelle            | 9.17E-03 | 8  | 8  | CC |
|           | intracellular organelle               | 1.59E-02 | 8  | 8  | CC |
|           | intracellular part                    | 4.85E-02 | 8  | 8  | CC |
|           | protein binding                       | 1.60E-02 | 8  | 8  | MF |
| Module 44 | regulation of biological process      | 5.11E-02 | 4  | 4  | BP |
| Module 45 | protein binding                       | 4.45E-02 | 5  | 5  | MF |
| Module 47 | membrane part                         | 1.76E-05 | 13 | 13 | CC |
|           | membrane                              | 1.52E-04 | 13 | 13 | CC |
|           | protein binding                       | 7.01E-03 | 13 | 13 | MF |
| Module 48 | ligase activity                       | 5.44E-07 | 5  | 5  | MF |
| Module 49 | macromolecule metabolic process       | 1.31E-03 | 7  | 7  | BP |
|           | cellular metabolic process            | 4.96E-03 | 7  | 7  | BP |
|           | primary metabolic process             | 7.13E-03 | 7  | 7  | BP |
|           | protein binding                       | 5.41E-02 | 8  | 9  | MF |
| Module 50 | establishment of protein localization | 2.24E-06 | 6  | 6  | BP |
|           | macromolecule localization            | 1.04E-05 | 6  | 6  | BP |
|           | transport                             | 5.89E-04 | 6  | 6  | BP |
|           | establishment of localization         | 5.89E-04 | 6  | 6  | BP |
| Module 51 | translational initiation              | 9.05E-27 | 10 | 10 | BP |
|           | biosynthetic process                  | 9.29E-09 | 10 | 10 | BP |
|           | macromolecule metabolic process       | 1.58E-05 | 10 | 10 | BP |
|           | cellular metabolic process            | 1.20E-04 | 10 | 10 | BP |
|           | primary metabolic process             | 2.01E-04 | 10 | 10 | BP |
|           | protein complex                       | 9.76E-08 | 10 | 10 | CC |
|           | protein binding                       | 7.00E-03 | 10 | 10 | MF |
| Module 52 | regulation of biological process      | 4.84E-02 | 5  | 5  | BP |
| Module 54 | cellular developmental process        | 2.71E-06 | 7  | 7  | BP |
|           | anatomical structure development      | 2.97E-05 | 7  | 7  | BP |
|           | multicellular organismal development  | 5.88E-05 | 7  | 7  | BP |
|           | macromolecule metabolic process       | 3.53E-04 | 7  | 7  | BP |
|           | cellular metabolic process            | 1.35E-03 | 7  | 7  | BP |
|           | primary metabolic process             | 1.99E-03 | 7  | 7  | BP |
|           | regulation of biological process      | 7.34E-03 | 7  | 7  | BP |
|           | protein binding                       | 3.83E-02 | 7  | 7  | MF |
| Module 55 | protein binding                       | 3.94E-02 | 5  | 5  | MF |
| Module 56 | protein binding                       | 2.72E-02 | 8  | 8  | MF |
| Module 57 | extracellular structure organization  | 4.04E-07 | 4  | 4  | BP |
|           | cell adhesion                         | 7.41E-05 | 4  | 4  | BP |
|           | system process                        | 9.65E-04 | 4  | 4  | BP |
| Module 58 | regulation of biological process      | 4.98E-02 | 5  | 5  | BP |

|           |                                     |          |   |   |    |
|-----------|-------------------------------------|----------|---|---|----|
|           | protein binding                     | 4.73E-02 | 5 | 5 | MF |
| Module 60 | protein binding                     | 1.90E-02 | 8 | 8 | MF |
| Module 61 | protein binding                     | 3.54E-02 | 8 | 8 | MF |
| Module 62 | nitrogen compound metabolic process | 2.55E-04 | 5 | 5 | BP |
|           | macromolecule metabolic process     | 4.53E-03 | 5 | 5 | BP |
|           | cellular metabolic process          | 1.18E-02 | 5 | 5 | BP |
|           | primary metabolic process           | 1.49E-02 | 5 | 5 | BP |
|           | ribonucleoprotein complex           | 3.13E-07 | 5 | 5 | CC |
|           | intracellular organelle part        | 3.80E-03 | 5 | 5 | CC |
|           | organelle part                      | 3.88E-03 | 5 | 5 | CC |
|           | membrane-bounded organelle          | 4.48E-02 | 5 | 5 | CC |
| Module 63 | cell adhesion                       | 9.21E-04 | 3 | 3 | BP |
|           | reproductive process                | 1.24E-03 | 3 | 3 | BP |
|           | anatomical structure development    | 1.35E-02 | 3 | 3 | BP |
| Module 64 | macromolecule metabolic process     | 4.20E-03 | 6 | 6 | BP |
|           | cellular metabolic process          | 1.16E-02 | 6 | 6 | BP |
|           | primary metabolic process           | 1.54E-02 | 6 | 6 | BP |
| Module 65 | cellular membrane organization      | 5.33E-04 | 3 | 3 | BP |
|           | membrane organization               | 5.33E-04 | 3 | 3 | BP |
|           | vesicle-mediated transport          | 1.30E-03 | 3 | 3 | BP |
|           | transport                           | 2.20E-02 | 3 | 3 | BP |
|           | establishment of localization       | 2.20E-02 | 3 | 3 | BP |
|           | endomembrane system                 | 9.89E-03 | 3 | 3 | CC |
| Module 66 | cellular response to stimulus       | 1.32E-03 | 4 | 5 | BP |
|           | response to stress                  | 5.40E-03 | 4 | 5 | BP |
|           | biosynthetic process                | 5.40E-03 | 4 | 5 | BP |
|           | nitrogen compound metabolic process | 9.19E-03 | 4 | 5 | BP |
|           | macromolecule metabolic process     | 4.99E-02 | 4 | 5 | BP |
|           | transferase activity                | 1.40E-03 | 4 | 5 | MF |
|           | nucleic acid binding                | 1.54E-02 | 4 | 5 | MF |
|           | ion binding                         | 2.14E-02 | 4 | 5 | MF |
| Module 67 | nitrogen compound metabolic process | 7.57E-06 | 7 | 7 | BP |
|           | macromolecule metabolic process     | 4.01E-04 | 7 | 7 | BP |
|           | cellular metabolic process          | 1.70E-03 | 7 | 7 | BP |
|           | primary metabolic process           | 2.10E-03 | 7 | 7 | BP |
|           | ribonucleoprotein complex           | 4.70E-10 | 7 | 7 | CC |
|           | membrane-bounded organelle          | 1.90E-02 | 7 | 7 | CC |
|           | intracellular organelle             | 3.38E-02 | 7 | 7 | CC |
|           | nucleic acid binding                | 4.57E-05 | 7 | 7 | MF |
|           | protein binding                     | 2.22E-02 | 7 | 7 | MF |
| Module 68 | biosynthetic process                | 5.66E-07 | 8 | 8 | BP |
|           | nitrogen compound metabolic process | 2.26E-06 | 8 | 8 | BP |
|           | macromolecule metabolic process     | 2.03E-04 | 8 | 8 | BP |
|           | cellular metabolic process          | 1.05E-03 | 8 | 8 | BP |

|           |                                      |          |    |    |    |
|-----------|--------------------------------------|----------|----|----|----|
|           | primary metabolic process            | 1.61E-03 | 8  | 8  | BP |
|           | membrane-bounded organelle           | 8.31E-03 | 8  | 8  | CC |
|           | intracellular organelle              | 1.54E-02 | 8  | 8  | CC |
| Module 69 | organelle lumen                      | 3.44E-05 | 5  | 5  | CC |
|           | non-membrane-bounded organelle       | 1.44E-04 | 5  | 5  | CC |
|           | intracellular organelle part         | 4.05E-03 | 5  | 5  | CC |
|           | organelle part                       | 4.07E-03 | 5  | 5  | CC |
|           | membrane-bounded organelle           | 4.84E-02 | 5  | 5  | CC |
|           | nucleic acid binding                 | 1.17E-03 | 5  | 5  | MF |
| Module 71 | protein binding                      | 3.51E-02 | 8  | 8  | MF |
| Module 72 | cytoplasmic vesicle                  | 9.78E-14 | 10 | 10 | CC |
|           | vesicle                              | 1.36E-13 | 10 | 10 | CC |
|           | membrane-bounded organelle           | 2.09E-03 | 10 | 10 | MF |
|           | intracellular organelle              | 5.90E-03 | 10 | 10 | MF |
|           | intracellular part                   | 2.67E-02 | 10 | 10 | MF |
|           | intracellular                        | 3.52E-02 | 10 | 10 | MF |
| Module 73 | anatomical structure development     | 9.88E-03 | 4  | 4  | BP |
|           | multicellular organismal development | 1.18E-02 | 4  | 4  | BP |
|           | transcription factor activity        | 1.11E-02 | 3  | 4  | MF |
|           | nucleic acid binding                 | 4.62E-02 | 3  | 4  | MF |
| Module 74 | regulation of biological process     | 9.39E-05 | 26 | 30 | BP |
|           | membrane-bounded organelle           | 1.52E-05 | 27 | 29 | CC |
|           | intracellular organelle              | 1.77E-05 | 28 | 29 | CC |
|           | intracellular part                   | 7.30E-05 | 29 | 29 | CC |
|           | intracellular                        | 1.70E-04 | 29 | 29 | CC |
|           | protein binding                      | 8.28E-06 | 28 | 29 | MF |
| Module 75 | intracellular part                   | 1.27E-02 | 18 | 19 | CC |
|           | intracellular                        | 1.98E-02 | 18 | 19 | CC |
|           | protein binding                      | 3.28E-03 | 18 | 19 | MF |
| Module 76 | protein binding                      | 1.04E-05 | 23 | 23 | MF |
| Module 77 | protein complex                      | 4.54E-03 | 4  | 4  | CC |
| Module 79 | regulation of biological process     | 3.93E-04 | 13 | 13 | BP |
|           | membrane-bounded organelle           | 1.86E-03 | 13 | 13 | CC |
|           | intracellular organelle              | 5.25E-03 | 13 | 13 | CC |
|           | intracellular part                   | 2.05E-02 | 13 | 13 | CC |
|           | intracellular                        | 2.18E-02 | 13 | 13 | CC |
|           | protein binding                      | 1.37E-03 | 13 | 13 | MF |
| Module 80 | intracellular part                   | 7.86E-04 | 23 | 23 | CC |
|           | intracellular                        | 1.52E-03 | 23 | 23 | CC |
|           | protein binding                      | 2.32E-05 | 23 | 23 | MF |
| Module 81 | signal transmission                  | 3.96E-02 | 4  | 7  | BP |
|           | signaling process                    | 3.96E-02 | 4  | 7  | BP |
| Module 82 | membrane-bounded organelle           | 2.05E-03 | 13 | 13 | CC |
|           | intracellular organelle              | 4.36E-03 | 13 | 13 | CC |

|            |                                       |          |    |    |    |
|------------|---------------------------------------|----------|----|----|----|
|            | intracellular part                    | 2.61E-02 | 13 | 13 | CC |
|            | intracellular                         | 3.51E-02 | 13 | 13 | CC |
| Module 83  | intracellular                         | 2.06E-02 | 70 | 84 | CC |
|            | protein binding                       | 9.27E-17 | 84 | 88 | MF |
| Module 85  | intracellular                         | 1.84E-03 | 22 | 22 | CC |
|            | intracellular part                    | 7.74E-03 | 21 | 22 | CC |
|            | protein binding                       | 1.02E-03 | 21 | 23 | MF |
| Module 86  | regulation of biological process      | 5.23E-02 | 4  | 4  | BP |
| Module 87  | regulation of biological process      | 3.89E-03 | 9  | 9  | BP |
| Module 88  | protein binding                       | 9.31E-05 | 19 | 19 | MF |
| Module 89  | membrane                              | 3.06E-03 | 10 | 10 | CC |
|            | protein binding                       | 4.47E-02 | 10 | 10 | MF |
| Module 90  | membrane                              | 6.22E-07 | 30 | 34 | CC |
|            | protein binding                       | 2.80E-09 | 33 | 34 | MF |
|            | cell part                             | 1.57E-02 | 34 | 34 | CC |
| Module 91  | signaling pathway                     | 3.98E-07 | 10 | 10 | BP |
|            | protein binding                       | 3.73E-03 | 10 | 10 | MF |
| Module 92  | regulation of biological process      | 2.48E-03 | 11 | 11 | BP |
|            | membrane-bounded organelle            | 2.38E-03 | 11 | 11 | CC |
|            | intracellular organelle               | 6.47E-03 | 11 | 11 | CC |
|            | intracellular part                    | 2.96E-02 | 11 | 11 | CC |
|            | intracellular                         | 3.99E-02 | 11 | 11 | CC |
| Module 94  | regulation of biological process      | 1.40E-03 | 11 | 11 | BP |
|            | membrane-bounded organelle            | 2.66E-03 | 11 | 11 | CC |
|            | intracellular organelle               | 7.23E-03 | 11 | 11 | CC |
|            | intracellular part                    | 2.99E-02 | 11 | 11 | CC |
|            | intracellular                         | 3.96E-02 | 11 | 11 | CC |
|            | protein binding                       | 2.19E-03 | 11 | 11 | MF |
| Module 96  | regulation of biological process      | 1.82E-02 | 6  | 6  | BP |
| Module 97  | regulation of biological process      | 1.86E-02 | 7  | 7  | BP |
|            | membrane-bounded organelle            | 1.57E-02 | 7  | 7  | CC |
|            | intracellular organelle               | 2.82E-02 | 7  | 7  | CC |
|            | protein binding                       | 2.99E-02 | 7  | 7  | MF |
| Module 98  | regulation of biological process      | 2.18E-02 | 6  | 6  | BP |
|            | protein binding                       | 4.63E-02 | 6  | 6  | MF |
| Module 99  | establishment of protein localization | 7.13E-08 | 7  | 7  | BP |
|            | macromolecule localization            | 4.81E-07 | 7  | 7  | BP |
|            | transport                             | 1.28E-04 | 7  | 7  | BP |
|            | establishment of localization         | 1.28E-04 | 7  | 7  | BP |
|            | protein binding                       | 2.27E-02 | 7  | 7  | MF |
| Module 100 | signaling pathway                     | 2.51E-09 | 12 | 13 | BP |
|            | membrane                              | 4.90E-03 | 11 | 13 | CC |
|            | signal transducer activity            | 3.17E-09 | 12 | 13 | MF |
| Module 101 | signaling pathway                     | 6.93E-03 | 4  | 4  | BP |

|               |                                      |          |    |    |    |
|---------------|--------------------------------------|----------|----|----|----|
| Module 102    | regulation of biological process     | 2.04E-02 | 13 | 15 | BP |
|               | membrane                             | 2.47E-03 | 13 | 15 | CC |
|               | membrane part                        | 2.47E-03 | 12 | 15 | CC |
| Module 103    | protein binding                      | 2.39E-02 | 11 | 12 | MF |
| Module 104    | non-membrane-bounded organelle       | 1.05E-04 | 6  | 6  | CC |
|               | intracellular organelle part         | 1.95E-03 | 6  | 6  | CC |
|               | organelle part                       | 1.99E-03 | 6  | 6  | CC |
|               | membrane-bounded organelle           | 2.54E-02 | 6  | 6  | CC |
|               | intracellular organelle              | 4.55E-02 | 6  | 6  | CC |
| Module 105    | anatomical structure development     | 2.18E-02 | 4  | 4  | BP |
|               | multicellular organismal development | 2.18E-02 | 4  | 4  | BP |
| Module 106    | regulation of biological process     | 1.61E-03 | 11 | 11 | BP |
| Module 107    | macromolecule metabolic process      | 3.76E-02 | 5  | 6  | BP |
| Module 110    | protein binding                      | 1.08E-05 | 21 | 21 | MF |
| Module 111    | intracellular part                   | 2.78E-06 | 40 | 40 | CC |
|               | intracellular                        | 6.22E-06 | 40 | 40 | CC |
| Module 112    | cellular response to stimulus        | 8.05E-19 | 17 | 18 | BP |
|               | response to stress                   | 1.08E-14 | 17 | 18 | BP |
|               | nitrogen compound metabolic process  | 2.71E-13 | 17 | 18 | BP |
|               | macromolecule metabolic process      | 3.57E-09 | 17 | 18 | BP |
|               | cellular metabolic process           | 9.46E-08 | 17 | 18 | BP |
|               | primary metabolic process            | 2.17E-07 | 17 | 18 | BP |
|               | membrane-bounded organelle           | 1.83E-04 | 17 | 18 | CC |
|               | intracellular organelle              | 8.96E-04 | 17 | 18 | CC |
|               | intracellular part                   | 7.04E-03 | 17 | 18 | CC |
| intracellular | 1.02E-02                             | 17       | 18 | CC |    |
| Module 113    | regulation of biological process     | 1.02E-03 | 11 | 11 | BP |
|               | membrane-bounded organelle           | 4.37E-03 | 11 | 11 | CC |
|               | intracellular organelle              | 8.95E-03 | 11 | 11 | CC |
|               | intracellular part                   | 4.24E-02 | 11 | 11 | CC |
|               | intracellular                        | 4.93E-02 | 11 | 11 | CC |
| Module 114    | protein binding                      | 2.28E-02 | 6  | 6  | MF |
| Module 115    | primary metabolic process            | 3.03E-02 | 7  | 10 | BP |
| Module 116    | cellular metabolic process           | 9.75E-03 | 6  | 6  | BP |
|               | primary metabolic process            | 1.11E-02 | 6  | 6  | BP |
| Module 117    | protein binding                      | 2.11E-03 | 13 | 13 | MF |
| Module 118    | protein binding                      | 3.00E-02 | 7  | 7  | MF |
| Module 119    | protein binding                      | 4.78E-02 | 5  | 5  | MF |
| Module 120    | protein binding                      | 2.05E-04 | 18 | 18 | MF |
| Module 121    | cellular response to stimulus        | 1.49E-08 | 8  | 8  | BP |
|               | response to stress                   | 1.36E-06 | 8  | 8  | BP |
|               | nitrogen compound metabolic process  | 5.26E-06 | 8  | 8  | BP |
|               | macromolecule metabolic process      | 3.15E-04 | 8  | 8  | BP |
|               | cellular metabolic process           | 1.51E-03 | 8  | 8  | BP |

|            |                                       |          |    |    |    |
|------------|---------------------------------------|----------|----|----|----|
|            | primary metabolic process             | 2.19E-03 | 8  | 8  | BP |
|            | membrane-bounded organelle            | 9.45E-03 | 8  | 8  | CC |
|            | intracellular organelle               | 1.89E-02 | 8  | 8  | CC |
|            | nucleic acid binding                  | 6.24E-05 | 8  | 8  | MF |
|            | protein binding                       | 2.00E-02 | 8  | 8  | MF |
| Module 122 | protein binding                       | 1.33E-06 | 26 | 26 | MF |
| Module 123 | protein binding                       | 1.04E-04 | 20 | 20 | MF |
| Module 124 | macromolecule metabolic process       | 1.35E-05 | 11 | 11 | BP |
|            | primary metabolic process             | 1.87E-04 | 11 | 11 | BP |
|            | protein binding                       | 5.95E-03 | 11 | 11 | MF |
| Module 126 | transport                             | 3.59E-02 | 4  | 5  | BP |
|            | establishment of localization         | 3.59E-02 | 4  | 5  | BP |
|            | non-membrane-bounded organelle        | 1.18E-02 | 4  | 5  | CC |
|            | protein complex                       | 1.27E-02 | 4  | 5  | CC |
| Module 127 | anatomical structure development      | 6.83E-03 | 4  | 4  | BP |
|            | multicellular organismal development  | 8.59E-03 | 4  | 4  | BP |
|            | transcription repressor activity      | 6.56E-06 | 4  | 4  | MF |
| Module 128 | protein binding                       | 2.65E-02 | 9  | 10 | MF |
| Module 129 | membrane                              | 1.00E-02 | 7  | 7  | CC |
|            | membrane-bounded organelle            | 2.19E-02 | 7  | 7  | CC |
|            | intracellular organelle               | 4.24E-02 | 7  | 7  | CC |
| Module 131 | protein binding                       | 1.57E-03 | 15 | 16 | MF |
| Module 132 | cytoplasmic vesicle                   | 3.11E-03 | 3  | 4  | CC |
|            | vesicle                               | 3.11E-03 | 3  | 4  | CC |
|            | organelle organization                | 1.98E-02 | 3  | 4  | BP |
| Module 133 | vesicle-mediated transport            | 2.69E-03 | 3  | 3  | BP |
| Module 134 | regulation of biological process      | 3.52E-02 | 6  | 6  | BP |
| Module 135 | establishment of protein localization | 1.60E-05 | 5  | 5  | BP |
|            | macromolecule localization            | 5.11E-05 | 5  | 5  | BP |
|            | transport                             | 2.46E-03 | 5  | 5  | BP |
|            | establishment of localization         | 2.46E-03 | 5  | 5  | BP |
|            | organelle membrane                    | 9.36E-05 | 5  | 5  | CC |
|            | intracellular organelle part          | 7.49E-03 | 5  | 5  | CC |
|            | organelle part                        | 7.49E-03 | 5  | 5  | CC |
|            | membrane                              | 4.49E-02 | 5  | 5  | CC |

T\_Module denotes the index of topological modules.

Supplementary table 3: Summary of disease modules.

| D_M | Gene_name | Disease_name                                                        | Disease_category | T_M |
|-----|-----------|---------------------------------------------------------------------|------------------|-----|
| 1   | COPA      | Alzheimer's disease (age of onset)                                  | Psychiatric      | 3   |
|     | COPB2     | Schizophrenia(age at onset)                                         | Psychiatric      | 3   |
|     | COPZ1     | Platelet counts                                                     | Psychiatric      | 3   |
| 2   | CRYAB     | Myopathy, cardioskeletal, desmin-related, with cataract, 608810 (3) | Neurological     | 4   |
|     | HSPB1     | Charcot-Marie-Tooth disease, axonal, type 2F, 606595 (3)            | Neurological     | 4   |

|   |       |                                                                           |                |    |
|---|-------|---------------------------------------------------------------------------|----------------|----|
|   | HSPB1 | Neuropathy, distal hereditary motor, type IIB, 608634 (3)                 | Neurological   | 4  |
|   | HSPB8 | Charcot-Marie-Tooth disease, axonal, type 2L, 608673 (3)                  | Neurological   | 4  |
|   | HSPB8 | Neuropathy, distal hereditary motor, type IIA, 158590 (3)                 | Neurological   | 4  |
| 3 | SCN5A | Brugada syndrome 1, 601144                                                | Cardiovascular | 5  |
|   | SCN5A | Cardiomyopathy, dilated, 1E, 601154                                       | Cardiovascular | 5  |
|   | DMD   | Cardiomyopathy, dilated, 3B, 302045                                       | Cardiovascular | 5  |
|   | SCN5A | Heart block, nonprogressive, 113900                                       | Cardiovascular | 5  |
|   | SCN5A | Heart block, progressive, type IA, 113900                                 | Cardiovascular | 5  |
|   | DTNA  | Left ventricular noncompaction with congenital heart defects, 606617      | Cardiovascular | 5  |
|   | DTNA  | Left ventricular noncompaction, familial isolated, 1, 604169              | Cardiovascular | 5  |
|   | SCN5A | Long QT syndrome-3, 603830                                                | Cardiovascular | 5  |
|   | SCN5A | Sick sinus syndrome 1, 608567                                             | Cardiovascular | 5  |
|   | SCN5A | Ventricular fibrillation, idiopathic, 603829                              | Cardiovascular | 5  |
|   | SCN5A | Electrocardiographic conduction measures                                  | Cardiovascular | 5  |
|   | SCN5A | Electrocardiographic traits                                               | Cardiovascular | 5  |
|   | SNTB2 | HDL particle features                                                     | Cardiovascular | 5  |
|   | SCN5A | PR interval                                                               | Cardiovascular | 5  |
|   | SCN5A | QRS duration                                                              | Cardiovascular | 5  |
|   | SCN5A | QT interval                                                               | Cardiovascular | 5  |
|   | DMD   | Response to statin treatment (atorvastatin), change in cholesterol levels | Cardiovascular | 5  |
|   | SCN5A | Ventricular conduction                                                    | Cardiovascular | 5  |
|   | SNTB1 | Hypertension                                                              | Cardiovascular | 5  |
|   | MAST2 | Calcium levels                                                            | Cardiovascular | 5  |
|   | DTNA  | Coronary Artery Disease                                                   | Cardiovascular | 5  |
|   | DMD   | Coronary heart disease                                                    | Cardiovascular | 5  |
|   | SNTB1 | Glucose levels                                                            | Cardiovascular | 5  |
| 4 | DMD   | Type 2 diabetes                                                           | Endocrine      | 5  |
|   | DTNA  | Type 2 diabetes                                                           | Endocrine      | 5  |
|   | NOS1  | Type 2 diabetes                                                           | Endocrine      | 5  |
|   | SNTA1 | Type 2 diabetes                                                           | Endocrine      | 5  |
|   | MAST2 | Type 2 diabetes                                                           | Endocrine      | 5  |
|   | VAC14 | Type 2 diabetes                                                           | Endocrine      | 5  |
|   | SNTB1 | Glucose levels                                                            | Endocrine      | 5  |
| 5 | EGLN  | Hereditary hemorrhagic telangiectasia-1, 187300 (3)                       | Bone           | 6  |
|   | TGFR1 | Loeys-Dietz syndrome, type 1A, 609129 (3)                                 | Bone           | 6  |
|   | TGFR1 | Loeys-Dietz syndrome, type 2A, 608967 (3)                                 | Bone           | 6  |
|   | TGFR2 | Loeys-Dietz syndrome, type 1B, 610168 (3)                                 | Bone           | 6  |
|   | TGFR2 | Loeys-Dietz syndrome, type 2B, 610380 (3)                                 | Bone           | 6  |
|   | TGFB1 | Coronary heart disease                                                    | Bone           | 6  |
| 6 | MEIS1 | Aspirin exacerbated respiratory disease in asthmatics                     | Respiratory    | 11 |
|   | MEIS2 | Acute lung injury                                                         | Respiratory    | 11 |
|   | MEIS2 | Lung function (forced expiratory volume in 1 second)                      | Respiratory    | 11 |
|   | MEIS2 | Lung function (forced vital capacity)                                     | Respiratory    | 11 |
|   | PBX1  | Acute lung injury                                                         | Respiratory    | 11 |

|    |       |                                                                                                                                                                                            |                |    |
|----|-------|--------------------------------------------------------------------------------------------------------------------------------------------------------------------------------------------|----------------|----|
|    | MEIS2 | Response to taxane treatment (paclitaxel)                                                                                                                                                  | Respiratory    | 11 |
|    | PBX1  | Response to platinum-based chemotherapy in non-small-cell lung cancer                                                                                                                      | Respiratory    | 11 |
| 7  | MEIS1 | Restless legs syndrome                                                                                                                                                                     | Neurological   | 11 |
|    | PBX1  | Parkinson`s disease                                                                                                                                                                        | Neurological   | 11 |
|    | MEIS2 | Taste perception                                                                                                                                                                           | Neurological   | 11 |
|    | PBX1  | Taste perception                                                                                                                                                                           | Neurological   | 11 |
|    | MEIS2 | Response to antipsychotic treatment                                                                                                                                                        | Neurological   | 11 |
|    | MEIS2 | White matter integrity                                                                                                                                                                     | Neurological   | 11 |
|    | MEIS1 | Alzheimer`s disease (late onset)                                                                                                                                                           | Neurological   | 11 |
|    | PBX1  | Amyotrophic Lateral Sclerosis                                                                                                                                                              | Neurological   | 11 |
|    | PBX1  | Body mass index                                                                                                                                                                            | Neurological   | 11 |
|    | PBX1  | Body mass (lean)                                                                                                                                                                           | Neurological   | 11 |
| 8  | MEIS1 | Type 2 diabetes                                                                                                                                                                            | Endocrine      | 11 |
|    | MEIS2 | Insulin resistance                                                                                                                                                                         | Endocrine      | 11 |
|    | PBX1  | Diabetic retinopathy                                                                                                                                                                       | Endocrine      | 11 |
| 9  | MEIS1 | PR interval                                                                                                                                                                                | Cardiovascular | 11 |
|    | PBX1  | Response to statin treatment (atorvastatin), change in cholesterol levels                                                                                                                  | Cardiovascular | 11 |
|    | PBX1  | Blood pressure, CVD RF and other traits (body mass index (BMI), waist:hip ratio, renin activity in plasma, aldosterone concentration in plasma, BNP levels in plasma, alcohol consumption) | Cardiovascular | 11 |
|    | MEIS1 | Blood pressure, CVD RF and other traits (body mass index (BMI), waist:hip ratio, renin activity in plasma, aldosterone concentration in plasma, BNP levels in plasma, alcohol consumption) | Cardiovascular | 11 |
|    | MEIS2 | Eosinophil counts                                                                                                                                                                          | Cardiovascular | 11 |
|    | PBX1  | Coronary Artery Disease                                                                                                                                                                    | Cardiovascular | 11 |
| 10 | MEIS2 | Response to antipsychotic treatment                                                                                                                                                        | Psychiatric    | 11 |
|    | MEIS2 | White matter integrity                                                                                                                                                                     | Psychiatric    | 11 |
|    | PBX1  | Nicotine smoking                                                                                                                                                                           | Psychiatric    | 11 |
|    | PBX1  | Coronary Artery Disease                                                                                                                                                                    | Psychiatric    | 11 |
|    | MEIS1 | Alzheimer`s disease (late onset)                                                                                                                                                           | Psychiatric    | 11 |
|    | PBX1  | Amyotrophic Lateral Sclerosis                                                                                                                                                              | Psychiatric    | 11 |
|    | MEIS2 | Eosinophil counts                                                                                                                                                                          | Psychiatric    | 11 |
|    | PBX1  | Parkinson`s disease                                                                                                                                                                        | Psychiatric    | 11 |
| 11 | GLI3  | Hypothalamic hamartomas, somatic, 241800                                                                                                                                                   | Neurological   | 12 |
|    | GLI1  | Personality dimensions                                                                                                                                                                     | Neurological   | 12 |
|    | SKI   | Cognitive test performance                                                                                                                                                                 | Neurological   | 12 |
|    | ZIC2  | Holoprosencephaly-5, 609637                                                                                                                                                                | Neurological   | 12 |
|    | GLI3  | Acrocallosal syndrome, 200990                                                                                                                                                              | Neurological   | 12 |
| 12 | GLI3  | Heart Failure                                                                                                                                                                              | Cardiovascular | 12 |
|    | SKI   | Blood pressure, CVD RF and other traits                                                                                                                                                    | Cardiovascular | 12 |
|    | ZIC3  | Heterotaxy, X-linked visceral, 306955                                                                                                                                                      | Cardiovascular | 12 |
|    | GLI3  | Coronary heart disease                                                                                                                                                                     | Cardiovascular | 12 |
| 13 | ZIC2  | Holoprosencephaly-5, 609637                                                                                                                                                                | Endocrine      | 12 |
|    | ZIC3  | Heterotaxy, X-linked visceral, 306955                                                                                                                                                      | Endocrine      | 12 |
|    | GLI3  | Type 2 diabetes                                                                                                                                                                            | Endocrine      | 12 |
|    | GLI3  | Polycystic ovary syndrome                                                                                                                                                                  | Endocrine      | 12 |

|    |       |                                                                         |              |    |
|----|-------|-------------------------------------------------------------------------|--------------|----|
| 14 | CDK7  | Alzheimer`s disease                                                     | Neurological | 16 |
|    | CDK8  | Narcolepsy                                                              | Neurological | 16 |
|    | RNF11 | Schizophrenia (cytomegalovirus infection interaction)                   | Neurological | 16 |
|    | TCEA1 | Amyotrophic Lateral Sclerosis                                           | Neurological | 16 |
|    | UBA1  | Spinal muscular atrophy, X-linked 2, infantile, 301830                  | Neurological | 16 |
|    | NEDD4 | Parkinson`s disease (motor and cognition)                               | Neurological | 16 |
|    | NEDD4 | Brain connectivity                                                      | Neurological | 16 |
|    | CSTF3 | Taste perception                                                        | Neurological | 16 |
|    | WBP2  | White matter hyperintensity burden                                      | Neurological | 16 |
| 15 | THA   | Pituitary adenoma, nonfunctioning                                       | Endocrine    | 18 |
|    | THB   | Thyroid hormone resistance, 188570                                      | Endocrine    | 18 |
|    | TIF1A | Thyroid carcinoma, papillary, 188550                                    | Endocrine    | 18 |
|    | THB   | Thyroid hormone resistance, autosomal recessive, 274300                 | Endocrine    | 18 |
|    | THB   | Thyroid hormone resistance, selective pituitary, 145650                 | Endocrine    | 18 |
|    | NRIP1 | Type 1 diabetes                                                         | Endocrine    | 18 |
|    | RXRA  | Urinary metabolites                                                     | Endocrine    | 18 |
| 16 | NRIP1 | Major depressive disorder                                               | Psychiatric  | 18 |
|    | RXRA  | Amyotrophic Lateral Sclerosis                                           | Psychiatric  | 18 |
|    | NRIP1 | Cognitive performance                                                   | Psychiatric  | 18 |
|    | RXRA  | Intelligence                                                            | Psychiatric  | 18 |
| 17 | MED25 | Alcohol and nictotine co-dependence                                     | Psychiatric  | 18 |
|    | LAMC1 | IgE levels in asthmatics                                                | Respiratory  | 20 |
|    | NID1  | Lung function                                                           | Respiratory  | 20 |
|    | NID2  | Lung function                                                           | Respiratory  | 20 |
|    | NID2  | Pulmonary function                                                      | Respiratory  | 20 |
| 18 | LAMC1 | Smoking cessation                                                       | Respiratory  | 20 |
|    | FBLN2 | Schizophrenia                                                           | Neurological | 20 |
|    | FBLN2 | Alzheimer`s disease                                                     | Neurological | 20 |
|    | FBLN2 | Partial epilepsies                                                      | Neurological | 20 |
| 19 | LAMB1 | Personality dimensions                                                  | Neurological | 20 |
|    | MYCL1 | Schizophrenia                                                           | Neurological | 21 |
|    | MYCN  | Microcephaly and digital abnormalities with normal intelligence, 602585 | Neurological | 21 |
|    | SMC3  | Cornelia de Lange syndrome 3, 610759                                    | Neurological | 21 |
|    | MXI1  | Normalized brain volume                                                 | Neurological | 21 |
|    | MXI1  | Multiple myeloma                                                        | Neurological | 21 |
| 20 | MXI1  | Neurofibrosarcoma                                                       | Neurological | 21 |
|    | MXI1  | Multiple myeloma                                                        | Cancer       | 21 |
|    | MXI1  | Neurofibrosarcoma                                                       | Cancer       | 21 |
|    | MXI1  | Prostate cancer, susceptibility to, 176807                              | Cancer       | 21 |
|    | MYC   | Burkitt lymphoma, 113970                                                | Cancer       | 21 |
| 21 | MYCL1 | Response to taxane treatment (placlitaxel)                              | Cancer       | 21 |
|    | MCM6  | Depression (quantitative trait)                                         | Psychiatric  | 23 |
|    | ORC4  | Sudden cardiac arrest                                                   | Psychiatric  | 23 |
|    | MCM5  | Coronary heart disease                                                  | Psychiatric  | 23 |

|      |                                      |                                                                                      |                |    |
|------|--------------------------------------|--------------------------------------------------------------------------------------|----------------|----|
|      | MCM3                                 | Alzheimer`s disease                                                                  | Psychiatric    | 23 |
|      | ORC5                                 | Amyotrophic Lateral Sclerosis                                                        | Psychiatric    | 23 |
|      | ORC4                                 | Parkinson`s disease                                                                  | Psychiatric    | 23 |
| 22   | ORC4                                 | Sudden cardiac arrest                                                                | Cardiovascular | 23 |
|      | MCM5                                 | Coronary heart disease                                                               | Cardiovascular | 23 |
|      | MCM2                                 | Health and aging, CVD and cancer age of onset                                        | Cardiovascular | 23 |
|      | CDC6                                 | Birth weight                                                                         | Cardiovascular | 23 |
|      | MCM6                                 | Lipid levels                                                                         | Cardiovascular | 23 |
| 23   | CAPON                                | QT interval, modifier of, 610141                                                     | Cardiovascular | 24 |
|      | SYN3                                 | Response to statin treatment (atorvastatin), change in cholesterol levels            | Cardiovascular | 24 |
|      | SYN2                                 | Blood pressure, CVD RF and other traits                                              | Cardiovascular | 24 |
|      | SYN3                                 | Eosinophil counts                                                                    | Cardiovascular | 24 |
|      | SYN3                                 | Glucose levels                                                                       | Cardiovascular | 24 |
|      | SYN3                                 | Serum albumin level                                                                  | Cardiovascular | 24 |
|      | SYN3                                 | C-reactive protein                                                                   | Cardiovascular | 24 |
| 24   | SYN3                                 | Eosinophil counts                                                                    | Psychiatric    | 24 |
|      | SYN3                                 | C-reactive protein                                                                   | Psychiatric    | 24 |
|      | SYN3                                 | Major depressive disorder (broad)                                                    | Psychiatric    | 24 |
|      | SYN3                                 | Suicide attempts in bipolar disorder                                                 | Psychiatric    | 24 |
|      | SYN2                                 | White matter integrity                                                               | Psychiatric    | 24 |
|      | SYN3                                 | White matter integrity                                                               | Psychiatric    | 24 |
|      | SYN3                                 | Response to cholinesterase inhibitors in Alzheimer`s disease                         | Psychiatric    | 24 |
|      | SYN1                                 | Amyotrophic Lateral Sclerosis                                                        | Psychiatric    | 24 |
|      | SYN3                                 | Cognitive impairment induced by topiramate                                           | Psychiatric    | 24 |
|      | SYN3                                 | Cognitive test performance                                                           | Psychiatric    | 24 |
| 24   | SYN2                                 | Schizophrenia, susceptibility to, 181500                                             | Psychiatric    | 24 |
| 25   | CCNA2                                | Red blood cell traits                                                                | Hematological  | 27 |
|      | FLNB                                 | Adverse response to chemotherapy (neutropenia/leucopenia) (carboplatin)              | Hematological  | 27 |
|      | FLNB                                 | Adverse response to chemotherapy (neutropenia/leucopenia) (paclitaxel + carboplatin) | Hematological  | 27 |
|      | BRD2                                 | Adverse response to chemotherapy (neutropenia/leucopenia) (cisplatin)                | Hematological  | 27 |
|      | HIST1H3B                             | Red blood cell traits                                                                | Hematological  | 27 |
|      | HIST1H4C                             | Red blood cell traits                                                                | Hematological  | 27 |
|      | HIST1H4B                             | Other erythrocyte phenotypes                                                         | Hematological  | 27 |
|      | HIST1H4B                             | Red blood cell traits                                                                | Hematological  | 27 |
|      | DNMT1                                | Atopy                                                                                | Hematological  | 27 |
|      | DNMT1                                | Thiazide-induced adverse metabolic effects in hypertensive patients                  | Hematological  | 27 |
|      | TLE1                                 | Blood Pressure and Arterial Stiffness                                                | Hematological  | 27 |
|      | TLE1                                 | Blood pressure, CVD RF and other traits                                              | Hematological  | 27 |
|      | CDC20                                | Platelet counts                                                                      | Hematological  | 27 |
|      | FLNA                                 | Heterotopia, periventricular nodular, with frontometaphyseal dysplasia, 300049       | Hematological  | 27 |
| FLNA | Heterotopia, periventricular, 300049 | Hematological                                                                        | 27             |    |
| FLNB | Lymphocyte counts                    | Hematological                                                                        | 27             |    |
| 26   | FLNB                                 | Boomerang dysplasia, 112310                                                          | Bone           | 27 |
|      | FLNB                                 | Larsen syndrome, 150250                                                              | Bone           | 27 |

|    |          |                                                                                                                                               |                |    |
|----|----------|-----------------------------------------------------------------------------------------------------------------------------------------------|----------------|----|
|    | FLNB     | Spondylocarpotarsal synostosis syndrome, 272460                                                                                               | Bone           | 27 |
|    | MARK3    | Bone mineral density (spine)                                                                                                                  | Bone           | 27 |
|    | MARK3    | Bone mineral density                                                                                                                          | Bone           | 27 |
|    | HIST1H3B | Uric acid levels                                                                                                                              | Bone           | 27 |
|    | HIST1H3B | Urate levels                                                                                                                                  | Bone           | 27 |
|    | HIST1H4C | Urate levels                                                                                                                                  | Bone           | 27 |
|    | HIST1H4B | Urate levels                                                                                                                                  | Bone           | 27 |
|    | BRD2     | Rheumatoid arthritis                                                                                                                          | Bone           | 27 |
|    | FLNA     | Heterotopia, periventricular, ED variant, 300537                                                                                              | Bone           | 27 |
|    | FLNB     | Atelosteogenesis, type III, 108721                                                                                                            | Bone           | 27 |
|    | FLNB     | Atelosteogenesis, type I, 108720                                                                                                              | Bone           | 27 |
|    | FLNA     | Otopalatodigital syndrome, type I, 311300                                                                                                     | Bone           | 27 |
|    | FLNA     | Otopalatodigital syndrome, type II, 304120                                                                                                    | Bone           | 27 |
|    | FLNA     | Frontometaphyseal dysplasia, 304120                                                                                                           | Bone           | 27 |
|    | FLNA     | Melnick-Needles syndrome, 309350                                                                                                              | Bone           | 27 |
|    | CDKN3    | Electrocardiographic traits and heart rate variability                                                                                        | Cardiovascular | 27 |
|    | TLE1     | Aortic root size                                                                                                                              | Cardiovascular | 27 |
|    | FLNB     | Myocardial Infarction                                                                                                                         | Cardiovascular | 27 |
|    | TLE1     | Tonometry                                                                                                                                     | Cardiovascular | 27 |
|    | DNMT1    | Thiazide-induced adverse metabolic effects in hypertensive patients                                                                           | Cardiovascular | 27 |
|    | TLE1     | Blood Pressure and Arterial Stiffness                                                                                                         | Cardiovascular | 27 |
|    | TLE1     | Blood pressure, CVD RF and other traits                                                                                                       | Cardiovascular | 27 |
|    | FLNA     | Heterotopia, periventricular, ED variant, 300537                                                                                              | Cardiovascular | 27 |
|    | CDC20    | Platelet counts                                                                                                                               | Cardiovascular | 27 |
|    | TLE2     | ldl cholesterol                                                                                                                               | Cardiovascular | 27 |
|    | TLE2     | Cholesterol                                                                                                                                   | Cardiovascular | 27 |
| 27 | FLNB     | Lymphocyte counts                                                                                                                             | Cardiovascular | 27 |
|    | CCNE1    | Type 2 diabetes                                                                                                                               | Endocrine      | 27 |
|    | CDK2     | Polycystic ovary syndrome                                                                                                                     | Endocrine      | 27 |
| 28 | BRD2     | Type 1 diabetes                                                                                                                               | Endocrine      | 27 |
|    | TLE1     | Type 2 diabetes                                                                                                                               | Endocrine      | 27 |
|    | TLE2     | Type 2 diabetes                                                                                                                               | Endocrine      | 27 |
|    | CCNH     | Response to lithium treatment in bipolar disorder                                                                                             | Psychiatric    | 27 |
|    | FLNB     | Suicide attempts in bipolar disorder                                                                                                          | Psychiatric    | 27 |
| 29 | FLNB     | Eating disorders (purging via substances)                                                                                                     | Psychiatric    | 27 |
|    | TAF2     | Suicide attempts in bipolar disorder                                                                                                          | Psychiatric    | 27 |
|    | HAT1     | Suicide attempts in bipolar disorder                                                                                                          | Psychiatric    | 27 |
|    | CBX1     | Depression (quantitative trait)                                                                                                               | Psychiatric    | 27 |
|    | TAF2     | Tourette syndrome                                                                                                                             | Psychiatric    | 27 |
|    | CDK2     | White matter integrity                                                                                                                        | Psychiatric    | 27 |
|    | CDC20    | Platelet counts                                                                                                                               | Psychiatric    | 27 |
|    | TLE2     | ldl cholesterol                                                                                                                               | Psychiatric    | 27 |
|    | TLE2     | Amyotrophic Lateral Sclerosis                                                                                                                 | Psychiatric    | 27 |
|    | BRD2     | Autism spectrum disorder, attention deficit-hyperactivity disorder, bipolar disorder, major depressive disorder, and schizophrenia (combined) | Psychiatric    | 27 |

|      |                                                                                                                                               |                                                                                |                  |    |
|------|-----------------------------------------------------------------------------------------------------------------------------------------------|--------------------------------------------------------------------------------|------------------|----|
|      | TLE2                                                                                                                                          | Cholesterol                                                                    | Psychiatric      | 27 |
|      | TLE2                                                                                                                                          | Parkinson`s disease                                                            | Psychiatric      | 27 |
|      | DNMT1                                                                                                                                         | Cognitive impairment induced by topiramate                                     | Psychiatric      | 27 |
|      | CCNE1                                                                                                                                         | Alcohol dependence                                                             | Psychiatric      | 27 |
|      | FLNB                                                                                                                                          | Alcohol dependence                                                             | Psychiatric      | 27 |
|      | FLNB                                                                                                                                          | Alcoholism                                                                     | Psychiatric      | 27 |
| 30   | FLNA                                                                                                                                          | Heterotopia, periventricular nodular, with frontometaphyseal dysplasia, 300049 | Neurological     | 27 |
|      | FLNA                                                                                                                                          | Heterotopia, periventricular, 300049                                           | Neurological     | 27 |
|      | FLNB                                                                                                                                          | Atelosteogenesis, type III, 108721                                             | Neurological     | 27 |
|      | FLNB                                                                                                                                          | Atelostogenesis, type I, 108720                                                | Neurological     | 27 |
|      | FLNA                                                                                                                                          | Otopalatodigital syndrome, type I, 311300                                      | Neurological     | 27 |
|      | FLNA                                                                                                                                          | Otopalatodigital syndrome, type II, 304120                                     | Neurological     | 27 |
|      | TAF1                                                                                                                                          | Dystonia-Parkinsonism, X-linked, 314250                                        | Neurological     | 27 |
|      | BRD2                                                                                                                                          | Multiple sclerosis                                                             | Neurological     | 27 |
|      | TLE2                                                                                                                                          | Parkinson`s disease                                                            | Neurological     | 27 |
|      | DNMT1                                                                                                                                         | Cognitive impairment induced by topiramate                                     | Neurological     | 27 |
|      | FLNA                                                                                                                                          | Frontometaphyseal dysplasia, 304120                                            | Neurological     | 27 |
|      | FLNA                                                                                                                                          | Melnick-Needles syndrome, 309350                                               | Neurological     | 27 |
|      | HIST1H4H                                                                                                                                      | Taste perception                                                               | Neurological     | 27 |
|      | FLNA                                                                                                                                          | Heterotopia, periventricular, ED variant, 300537                               | Neurological     | 27 |
|      | CDK2                                                                                                                                          | White matter integrity                                                         | Neurological     | 27 |
|      | CDK2                                                                                                                                          | White matter integrity                                                         | Neurological     | 27 |
|      | TLE2                                                                                                                                          | Amyotrophic Lateral Sclerosis                                                  | Neurological     | 27 |
| BRD2 | Autism spectrum disorder, attention deficit-hyperactivity disorder, bipolar disorder, major depressive disorder, and schizophrenia (combined) | Neurological                                                                   | 27               |    |
| 31   | CDK2                                                                                                                                          | Asthma                                                                         | Respiratory      | 27 |
|      | CDK2                                                                                                                                          | Pulmonary function                                                             | Respiratory      | 27 |
|      | TLE1                                                                                                                                          | Acute lung injury                                                              | Respiratory      | 27 |
|      | FLNB                                                                                                                                          | Lymphocyte counts                                                              | Respiratory      | 27 |
|      | BRD2                                                                                                                                          | Rheumatoid arthritis                                                           | Respiratory      | 27 |
|      | TLE2                                                                                                                                          | Lung adenocarcinoma                                                            | Respiratory      | 27 |
|      | REM1                                                                                                                                          | Lung adenocarcinoma                                                            | Respiratory      | 27 |
| 32   | MITF                                                                                                                                          | Tietz syndrome, 103500                                                         | Ophthalmological | 28 |
|      | MITF                                                                                                                                          | Waardenburg syndrome, type IIA, 193510                                         | Ophthalmological | 28 |
|      | MITF                                                                                                                                          | Waardenburg syndrome/ocular albinism, digenic, 103470                          | Ophthalmological | 28 |
|      | PAX6                                                                                                                                          | Aniridia, 106210                                                               | Ophthalmological | 28 |
|      | PAX6                                                                                                                                          | Cataract with late-onset corneal dystrophy, 604219                             | Ophthalmological | 28 |
|      | PAX6                                                                                                                                          | Coloboma of optic nerve, 120430                                                | Ophthalmological | 28 |
|      | PAX6                                                                                                                                          | Coloboma, ocular, 120200                                                       | Ophthalmological | 28 |
|      | PAX6                                                                                                                                          | Ectopia pupillae, 129750                                                       | Ophthalmological | 28 |
|      | PAX6                                                                                                                                          | Foveal hyperplasia, 136520                                                     | Ophthalmological | 28 |
|      | PAX6                                                                                                                                          | Keratitis, 148190                                                              | Ophthalmological | 28 |
|      | PAX6                                                                                                                                          | Optic nerve hypoplasia, 165550                                                 | Ophthalmological | 28 |
|      | PAX6                                                                                                                                          | Peters anomaly, 604229                                                         | Ophthalmological | 28 |
|      | PAX6                                                                                                                                          | Myopia (severe)                                                                | Ophthalmological | 28 |

|       |                        |                                                                          |                  |    |
|-------|------------------------|--------------------------------------------------------------------------|------------------|----|
|       | RX                     | Microphthalmia, isolated 3, 611038                                       | Ophthalmological | 28 |
|       | VXS2                   | Microphthalmia, isolated 2, 610093                                       | Ophthalmological | 28 |
|       | VXS2                   | Microphthalmia, isolated, with coloboma 3, 610092                        | Ophthalmological | 28 |
|       | PIAS3                  | Contrast sensitivity                                                     | Neurological     | 28 |
|       | GFI1                   | Multiple sclerosis                                                       | Neurological     | 28 |
|       | PAX6                   | Peters anomaly, 604229                                                   | Neurological     | 28 |
| 33    | TAF1B                  | Adverse response to chemotherapy (neutropenia/leucopenia) (cisplatin)    | Hematological    | 31 |
|       | TAF8                   | Adverse response to chemotherapy (neutropenia/leucopenia) (camptothecin) | Hematological    | 31 |
|       | TAF8                   | Red blood cell traits                                                    | Hematological    | 31 |
|       | EDF1                   | Self-reported allergy                                                    | Hematological    | 31 |
|       | DKC1                   | Dyskeratosis congenita-1, 305000                                         | Hematological    | 31 |
|       | DKC1                   | Hoyeraal-Hreidarsson syndrome, 300240                                    | Hematological    | 31 |
|       | TAF1B                  | Lymphocyte counts                                                        | Hematological    | 31 |
| 34    | BTAF1                  | Bipolar disorder                                                         | Psychiatric      | 31 |
|       | BTAF1                  | Schizophrenia                                                            | Psychiatric      | 31 |
|       | TAF5                   | Brain structure                                                          | Psychiatric      | 31 |
|       | TAF1C                  | Autism                                                                   | Psychiatric      | 31 |
|       | TAF11                  | Alcoholism (heaviness of drinking)                                       | Psychiatric      | 31 |
|       | TAF1A                  | Alcohol dependence                                                       | Psychiatric      | 31 |
|       | TBP                    | Parkinson disease, 168600                                                | Psychiatric      | 31 |
| BTAF1 | Personality dimensions | Psychiatric                                                              | 31               |    |
| 35    | KAP0                   | Myxoma, intracardiac, 255960                                             | Cardiovascular   | 33 |
|       | AKAP9                  | Long QT syndrome-11, 611820                                              | Cardiovascular   | 33 |
|       | AKAP2                  | Aortic root size                                                         | Cardiovascular   | 33 |
|       | AKAP5                  | Intracranial aneurysm                                                    | Cardiovascular   | 33 |
|       | AKAP3                  | Lymphocyte counts                                                        | Cardiovascular   | 33 |
| 36    | MBP                    | Type 2 diabetes                                                          | Endocrine        | 34 |
|       | PTPRR                  | Insulin resistance                                                       | Endocrine        | 34 |
|       | MKNK1                  | Type 2 diabetes                                                          | Endocrine        | 34 |
|       | RAF1                   | Noonan syndrome 5, 611553                                                | Endocrine        | 34 |
|       | RASN                   | Thyroid carcinoma, follicular, 188470                                    | Endocrine        | 34 |
| 37    | MYO5A                  | Griscelli syndrome, type 1, 214450                                       | Neurological     | 38 |
|       | RB27A                  | Griscelli syndrome, type 2, 607624                                       | Neurological     | 38 |
|       | MELPH                  | Griscelli syndrome, type 3, 609227                                       | Neurological     | 38 |
|       | MYO5A                  | Schizophrenia                                                            | Neurological     | 38 |
|       | SYTL4                  | Amyotrophic Lateral Sclerosis                                            | Neurological     | 38 |
|       | SYTL4                  | Cognitive impairment induced by topiramate                               | Neurological     | 38 |
|       | MYO5A                  | Prion diseases                                                           | Neurological     | 38 |
| 38    | RBP2                   | Type 2 diabetes                                                          | Endocrine        | 39 |
|       | XPO1                   | Type 2 diabetes                                                          | Endocrine        | 39 |
|       | AIMP2                  | Type 2 diabetes                                                          | Endocrine        | 39 |
|       | IPO11                  | Type 2 diabetes                                                          | Endocrine        | 39 |
|       | XPO5                   | Type 2 diabetes                                                          | Endocrine        | 39 |
| 39    | RING1                  | Coronary heart disease                                                   | Psychiatric      | 40 |

|       |                        |                                                                                            |              |    |
|-------|------------------------|--------------------------------------------------------------------------------------------|--------------|----|
|       | PCGF3                  | Cognitive impairment induced by topiramate                                                 | Psychiatric  | 40 |
|       | PCGF3                  | Hemostatic factors and hematological phenotypes                                            | Psychiatric  | 40 |
|       | PCGF3                  | Parkinson`s disease                                                                        | Psychiatric  | 40 |
|       | PCGF3                  | Eating disorders                                                                           | Psychiatric  | 40 |
|       | RYBP                   | Soluble levels of adhesion molecules                                                       | Psychiatric  | 40 |
|       | PCGF5                  | Platelet aggregation(pre- and post-aspirin)                                                | Psychiatric  | 40 |
|       | CBX2                   | Schizophrenia                                                                              | Psychiatric  | 40 |
| 40    | FHL1                   | Myopathy, X-linked, with postural muscle atrophy, 300696                                   | Neurological | 40 |
|       | FHL1                   | Myopathy, reducing body, X-linked, severe early-onset, 300717                              | Neurological | 40 |
|       | PCGF3                  | Cognitive impairment induced by topiramate                                                 | Neurological | 40 |
|       | PCGF3                  | Hemostatic factors and hematological phenotypes                                            | Neurological | 40 |
|       | PCGF3                  | Parkinson`s disease                                                                        | Neurological | 40 |
|       | CBX7                   | Multiple myeloma                                                                           | Neurological | 40 |
|       | PCGF6                  | White matter hyperintensity burden                                                         | Neurological | 40 |
|       | CBX2                   | Schizophrenia                                                                              | Neurological | 40 |
| 41    | CUL5                   | Functional impairment in major depressive disorder, bipolar disorder and schizophrenia     | Psychiatric  | 42 |
|       | UBA3                   | Coronary heart disease                                                                     | Psychiatric  | 42 |
|       | FBXW7                  | Suicide attempts in bipolar disorder                                                       | Psychiatric  | 42 |
|       | KDM2B                  | Parkinson`s disease                                                                        | Psychiatric  | 42 |
|       | SEN8                   | Metabolite levels (MHPG)                                                                   | Psychiatric  | 42 |
| 42    | ATX3                   | Machado-Joseph disease, 109150                                                             | Neurological | 49 |
|       | TERA                   | Inclusion body myopathy with early-onset Paget disease and frontotemporal dementia, 167320 | Neurological | 49 |
|       | UBE4B                  | Alzheimer`s disease (late onset)                                                           | Neurological | 49 |
| 43    | RAB3B                  | Alzheimer`s disease                                                                        | Psychiatric  | 50 |
|       | RIMS2                  | Heroin addiction                                                                           | Psychiatric  | 50 |
|       | RIMS2                  | Asperger disorder                                                                          | Psychiatric  | 50 |
|       | RIMS2                  | Suicide attempts in bipolar disorder                                                       | Psychiatric  | 50 |
|       | RIMS2                  | Cocaine dependence                                                                         | Psychiatric  | 50 |
|       | RIMS2                  | Parkinson`s disease (interaction with coffee consumption)                                  | Psychiatric  | 50 |
|       | RIMS1                  | Schizophrenia                                                                              | Psychiatric  | 50 |
|       | RIMS1                  | Coronary Artery Disease                                                                    | Psychiatric  | 50 |
|       | RIMS1                  | Coronary heart disease                                                                     | Psychiatric  | 50 |
|       | RIMS1                  | Alzheimer`s disease                                                                        | Psychiatric  | 50 |
|       | RIMS1                  | Response to statin therapy                                                                 | Psychiatric  | 50 |
|       | RIMS1                  | Cognitive impairment induced by topiramate                                                 | Psychiatric  | 50 |
| RIMS1 | Personality dimensions | Psychiatric                                                                                | 50           |    |
| 44    | RIMS1                  | Lung function (forced expiratory volume in 1 second to forced vital capacity ratio)        | Respiratory  | 50 |
|       | RIMS1                  | Asthma (childhood onset)                                                                   | Respiratory  | 50 |
|       | RIMS2                  | Lung function (forced expiratory volume in 1 second)                                       | Respiratory  | 50 |
|       | RIMS2                  | Lung function (forced vital capacity)                                                      | Respiratory  | 50 |
|       | RAB3B                  | Smoking behavior                                                                           | Respiratory  | 50 |
| 45    | EIF3H                  | Alcohol dependence                                                                         | Psychiatric  | 51 |
|       | EIF3F                  | Depression (quantitative trait)                                                            | Psychiatric  | 51 |

|    |       |                                                                                                            |              |    |
|----|-------|------------------------------------------------------------------------------------------------------------|--------------|----|
|    | EIF3D | Schizophrenia                                                                                              | Psychiatric  | 51 |
|    | EIF3F | Alzheimer`s disease                                                                                        | Psychiatric  | 51 |
|    | EIF3A | Cognitive test performance                                                                                 | Psychiatric  | 51 |
| 46 | EIF3E | Prostate cancer                                                                                            | Cancer       | 51 |
|    | EIF3K | Lung adenocarcinoma                                                                                        | Cancer       | 51 |
|    | EIF3E | Chemotherapeutic response (cytarabine, 5` deoxyfluorouridine, carboplatin, cisplatin), in blood cell lines | Cancer       | 51 |
|    | EIF3L | Oral cancers (chewing tobacco related)                                                                     | Cancer       | 51 |
| 47 | EI2BA | Leukoencephalopathy with vanishing white matter, 603896                                                    | Neurological | 54 |
|    | EI2BD | Leukoencephaly with vanishing white matter, 603896                                                         | Neurological | 54 |
|    | EI2BD | Ovarioleukodystrophy, 603896                                                                               | Neurological | 54 |
|    | EI2BG | Leukoencephalopathy with vanishing white matter, 603896                                                    | Neurological | 54 |
|    | EI2BB | Leukoencephalopathy with vanishing white matter, 603896                                                    | Neurological | 54 |
|    | EI2BB | Ovarioleukodystrophy, 603896                                                                               | Neurological | 54 |
|    | EI2BE | Leukoencephalopathy with vanishing white matter, 603896                                                    | Neurological | 54 |
| 48 | EI2BE | Ovarioleukodystrophy, 603896                                                                               | Neurological | 54 |
|    | LEPR  | Glioma (high-grade)                                                                                        | Neurological | 55 |
|    | LEPR  | Cognitive test performance                                                                                 | Neurological | 55 |
|    | MAP1S | Cognitive impairment induced by topiramate                                                                 | Neurological | 55 |
|    | SOCS3 | Dermatitis, atopic, 4, 605805                                                                              | Neurological | 55 |
| 49 | PGFRB | Myeloproliferative disorder with eosinophilia, 131440                                                      | Cancer       | 56 |
|    | PTEN  | Cowden disease, 158350                                                                                     | Cancer       | 56 |
|    | PTEN  | Endometrial carcinoma                                                                                      | Cancer       | 56 |
|    | PTEN  | Lhermitte-Duclos syndrome                                                                                  | Cancer       | 56 |
|    | PTEN  | Meningioma, 607174                                                                                         | Cancer       | 56 |
|    | PTEN  | Oligodendroglioma, 137800                                                                                  | Cancer       | 56 |
|    | PTEN  | Prostate cancer, 176807                                                                                    | Cancer       | 56 |
|    | CFTR  | Paclitaxel sensitivity in NCI60 cancer cell lines                                                          | Cancer       | 56 |
|    | PGFRB | Myelomonocytic leukemia, chronic                                                                           | Cancer       | 56 |
|    | PTEN  | Thyroid carcinoma, follicular, 188470                                                                      | Cancer       | 56 |
|    | PTEN  | Proteus syndrome, 176920                                                                                   | Cancer       | 56 |
| 50 | ACTN1 | Brain structure                                                                                            | Neurological | 61 |
|    | DRD3  | Alzheimer`s disease                                                                                        | Neurological | 61 |
|    | KIF1B | Bulimia nervosa                                                                                            | Neurological | 61 |
|    | GTR1  | Dystonia-18, 612126 (3)                                                                                    | Neurological | 61 |
|    | KIF1B | Charcot-Marie-Tooth disease, type 2A1, 118210 (3)                                                          | Neurological | 61 |
|    | KIF1B | Multiple sclerosis                                                                                         | Neurological | 61 |
|    | PDIA3 | Parkinson`s disease                                                                                        | Neurological | 61 |
|    | CLIC6 | Odorant perception                                                                                         | Neurological | 61 |
|    | DRD3  | Essential tremor, susceptibility to, 190300 (3)                                                            | Neurological | 61 |
| 51 | ACTN1 | Suicide attempts in bipolar disorder                                                                       | Psychiatric  | 61 |
|    | GIPC1 | Suicide attempts in bipolar disorder                                                                       | Psychiatric  | 61 |
|    | ACTN1 | Coronary heart disease                                                                                     | Psychiatric  | 61 |
|    | PDIA3 | Coronary heart disease                                                                                     | Psychiatric  | 61 |
|    | KIF1B | Mean platelet volume                                                                                       | Psychiatric  | 61 |

|    |       |                                                           |             |    |
|----|-------|-----------------------------------------------------------|-------------|----|
|    | ACTN1 | Brain structure                                           | Psychiatric | 61 |
|    | DRD3  | Alzheimer`s disease                                       | Psychiatric | 61 |
|    | KIF1B | Bulimia nervosa                                           | Psychiatric | 61 |
|    | KIF1B | Triglycerides                                             | Psychiatric | 61 |
|    | PDIA3 | Parkinson`s disease                                       | Psychiatric | 61 |
|    | DRD3  | Schizophrenia, susceptibility to, 181500 (3)              | Psychiatric | 61 |
| 52 | RFC2  | Glycosylated haemoglobin levels                           | Endocrine   | 68 |
|    | RFC4  | Type 2 diabetes                                           | Endocrine   | 68 |
|    | RFC5  | Metabolite levels                                         | Endocrine   | 68 |
| 53 | ABI1  | Schizophrenia                                             | Psychiatric | 71 |
|    | ENAH  | Alcohol and nictotine co-dependence                       | Psychiatric | 71 |
|    | ABL1  | Response to amphetamines                                  | Psychiatric | 71 |
|    | ABL1  | Coronary heart disease                                    | Psychiatric | 71 |
|    | ENAH  | Parkinson`s disease                                       | Psychiatric | 71 |
|    | ABL1  | Personality dimensions                                    | Psychiatric | 71 |
| 54 | ENAH  | Personality dimensions                                    | Psychiatric | 71 |
|    | ABI1  | Acute lung injury                                         | Respiratory | 71 |
|    | ENAH  | Asthma                                                    | Respiratory | 71 |
|    | ABL1  | Lymphocyte counts                                         | Respiratory | 71 |
| 55 | EPS8  | Type 2 diabetes                                           | Endocrine   | 71 |
|    | ABI1  | Type 2 diabetes                                           | Endocrine   | 71 |
|    | ENAH  | Type 2 diabetes                                           | Endocrine   | 71 |
| 56 | AP1S2 | Mental retardation, X-linked 59, 300630                   | Psychiatric | 72 |
|    | EPN4  | Schizophrenia, susceptibility to, 181510                  | Psychiatric | 72 |
|    | AP1B1 | Alzheimer`s disease                                       | Psychiatric | 72 |
|    | AP2B1 | Mean platelet volume                                      | Psychiatric | 72 |
|    | AP1G1 | Cognitive test performance                                | Psychiatric | 72 |
|    | AP1G2 | Information processing speed                              | Psychiatric | 72 |
|    | AP1G2 | Sudden cardiac arrest                                     | Psychiatric | 72 |
|    | AP1M2 | Lipoprotein-associated phospholipase A2 activity and mass | Psychiatric | 72 |
| 57 | AKT1  | Breast cancer, somatic, 114480                            | Cancer      | 74 |
|    | AKT1  | Colorectal cancer, somatic, 114500                        | Cancer      | 74 |
|    | AKT1  | Ovarian cancer, somatic, 604370                           | Cancer      | 74 |
|    | MDM2  | Accelerated tumor formation, susceptibility to            | Cancer      | 74 |
|    | P53   | Breast cancer, 114480                                     | Cancer      | 74 |
|    | P53   | Colorectal cancer, 114500                                 | Cancer      | 74 |
|    | P53   | Histiocytoma                                              | Cancer      | 74 |
|    | P53   | Multiple malignancy syndrome                              | Cancer      | 74 |
|    | STK4  | Melanoma                                                  | Cancer      | 74 |
|    | P53   | Osteosarcoma                                              | Cancer      | 74 |
|    | P53   | Adrenal cortical carcinoma, 202300                        | Cancer      | 74 |
|    | P53   | Thyroid carcinoma                                         | Cancer      | 74 |
|    | P53   | Pancreatic cancer, 260350                                 | Cancer      | 74 |
|    | MYB   | T-cell acute lymphoblastic leukemia                       | Cancer      | 74 |

|       |                           |                                                                     |                |    |
|-------|---------------------------|---------------------------------------------------------------------|----------------|----|
|       | P53                       | Hepatocellular carcinoma, 114550                                    | Cancer         | 74 |
|       | FOXO1                     | Rhabdomyosarcoma, alveolar, 268220                                  | Cancer         | 74 |
|       | P53                       | Li-Fraumeni syndrome, 151623                                        | Cancer         | 74 |
|       | P53                       | Nasopharyngeal carcinoma, 161550                                    | Cancer         | 74 |
|       | STK4                      | Neuroblastoma                                                       | Cancer         | 74 |
| 58    | PKN2                      | Monocyte counts                                                     | Cardiovascular | 74 |
|       | P53                       | Adrenal cortical carcinoma, 202300                                  | Cardiovascular | 74 |
|       | FOXO1                     | Atrial fibrillation                                                 | Cardiovascular | 74 |
|       | ARRB1                     | Thiazide-induced adverse metabolic effects in hypertensive patients | Cardiovascular | 74 |
|       | MYB                       | Blood cell counts and traits, in red and white blood cells          | Cardiovascular | 74 |
| 59    | MK10                      | Epileptic encephalopathy, Lennox-Gastaut type, 606369               | Neurological   | 74 |
|       | PRKDC                     | Elbow pain                                                          | Neurological   | 74 |
|       | CHD3                      | Information processing speed                                        | Neurological   | 74 |
|       | STK4                      | Neuroblastoma                                                       | Neurological   | 74 |
|       | PIAS4                     | Word reading                                                        | Neurological   | 74 |
|       | TOPRS                     | Retinitis pigmentosa-31, 609923                                     | Neurological   | 74 |
|       | FOXO1                     | Rhabdomyosarcoma, alveolar, 268220                                  | Neurological   | 74 |
|       | P53                       | Li-Fraumeni syndrome, 151623                                        | Neurological   | 74 |
| 60    | AMPH                      | Alzheimer's disease (late onset)                                    | Psychiatric    | 75 |
|       | AMPH                      | Coronary heart disease                                              | Psychiatric    | 75 |
|       | AMPH                      | Alzheimer's disease                                                 | Psychiatric    | 75 |
|       | AMPH                      | Bipolar disorder                                                    | Psychiatric    | 75 |
|       | AMPH                      | Job-related exhaustion                                              | Psychiatric    | 75 |
|       | BIN1                      | Alcohol dependence                                                  | Psychiatric    | 75 |
|       | BIN1                      | Alzheimer's disease                                                 | Psychiatric    | 75 |
|       | BIN1                      | Alzheimer's disease (late onset)                                    | Psychiatric    | 75 |
|       | BIN1                      | White matter integrity                                              | Psychiatric    | 75 |
|       | BIN1                      | Progranulin levels                                                  | Psychiatric    | 75 |
|       | ARF1                      | Suicide attempts in bipolar disorder                                | Psychiatric    | 75 |
|       | HIP1                      | Alcoholism (heaviness of drinking)                                  | Psychiatric    | 75 |
|       | HIP1                      | Alcoholism (12-month weekly alcohol consumption)                    | Psychiatric    | 75 |
|       | HIP1                      | Prion diseases                                                      | Psychiatric    | 75 |
|       | SNX4                      | Suicide attempts in bipolar disorder                                | Psychiatric    | 75 |
|       | SNX4                      | Major depressive disorder (broad)                                   | Psychiatric    | 75 |
|       | SYNJ1                     | Suicide attempts in bipolar disorder                                | Psychiatric    | 75 |
|       | PDCD6                     | Alcohol dependence                                                  | Psychiatric    | 75 |
| GGA3  | Warfarin maintenance dose | Psychiatric                                                         | 75             |    |
| PACS1 | Personality dimensions    | Psychiatric                                                         | 75             |    |
| 61    | PLAK                      | Arrhythmogenic right ventricular dysplasia, familial, 12, 611528    | Cardiovascular | 76 |
|       | APC                       | Stroke                                                              | Cardiovascular | 76 |
|       | DSC1                      | Blood pressure (response to angiotensin II receptor blocker)        | Cardiovascular | 76 |
|       | DSC1                      | Blood pressure, CVD RF and other traits                             | Cardiovascular | 76 |
|       | LEF1                      | Blood pressure, CVD RF and other traits                             | Cardiovascular | 76 |
|       | PTPRB                     | Calcium levels                                                      | Cardiovascular | 76 |

|     |                                    |                                                                                                            |                |    |
|-----|------------------------------------|------------------------------------------------------------------------------------------------------------|----------------|----|
|     | PSN1                               | Cardiomyopathy, dilated, 1U                                                                                | Cardiovascular | 76 |
|     | PSN2                               | Cardiomyopathy, dilated, 1V                                                                                | Cardiovascular | 76 |
|     | ICAM5                              | Soluble ICAM-1                                                                                             | Cardiovascular | 76 |
|     | GSK3B                              | HDL cholesterol                                                                                            | Cardiovascular | 76 |
|     | APC                                | Adenomatous polyposis coli, 175100                                                                         | Cardiovascular | 76 |
|     | PLAK                               | Naxos disease, 601214                                                                                      | Cardiovascular | 76 |
| 62  | APC                                | Adenoma, periampullary                                                                                     | Cancer         | 76 |
|     | APC                                | Colorectal cancer, somatic, 114500                                                                         | Cancer         | 76 |
|     | CTNB1                              | Colorectal cancer                                                                                          | Cancer         | 76 |
|     | CTNB1                              | Ovarian carcinoma, endometrioid type                                                                       | Cancer         | 76 |
|     | PTPRB                              | Response to gemcitabine or arabinosylcytosin in blood cell lines                                           | Cancer         | 76 |
|     | ZEB1                               | Colorectal cancer                                                                                          | Cancer         | 76 |
|     | ICAM5                              | Breast cancer and prostate cancer                                                                          | Cancer         | 76 |
|     | LEF1                               | Chronic lymphocytic leukemia                                                                               | Cancer         | 76 |
|     | CTNB1                              | Pilomatricoma, 132600                                                                                      | Cancer         | 76 |
|     | LEF1                               | Sebaceous tumors, somatic                                                                                  | Cancer         | 76 |
|     | APC                                | Gastric cancer, somatic, 137215                                                                            | Cancer         | 76 |
|     | APC                                | Gardner syndrome                                                                                           | Cancer         | 76 |
|     | APC                                | Hepatoblastoma                                                                                             | Cancer         | 76 |
|     | CTNB1                              | Hepatoblastoma                                                                                             | Cancer         | 76 |
|     | CTNB1                              | Hepatocellular carcinoma, 114550                                                                           | Cancer         | 76 |
|     | APC                                | Desmoid disease, hereditary, 135290                                                                        | Cancer         | 76 |
| APC | Brain tumor-polyposis syndrome 2   | Cancer                                                                                                     | 76             |    |
| APC | Adenomatous polyposis coli, 175100 | Cancer                                                                                                     | 76             |    |
| 63  | CLOCK                              | Prostate cancer                                                                                            | Cancer         | 77 |
|     | EPAS1                              | Renal cell carcinoma                                                                                       | Cancer         | 77 |
|     | CLOCK                              | Chemotherapeutic response (cytarabine, 5' deoxyfluorouridine, carboplatin, cisplatin), in blood cell lines | Cancer         | 77 |
|     | VHL                                | Pheochromocytoma, 171300                                                                                   | Cancer         | 77 |
|     | VHL                                | Renal cell carcinoma, somatic, 144700                                                                      | Cancer         | 77 |
|     | VHL                                | Hemangioblastoma, cerebellar, somatic                                                                      | Cancer         | 77 |
|     | VHL                                | von Hippel-Lindau syndrome, 193300                                                                         | Cancer         | 77 |
| 64  | CCND1                              | Leukemia/lymphoma, chronic B-cell, 151400                                                                  | Cancer         | 79 |
|     | CCND1                              | von Hippel-Lindau disease, modification of, 193300                                                         | Cancer         | 79 |
|     | CCND1                              | Colorectal cancer, susceptibility to                                                                       | Cancer         | 79 |
|     | CDK4                               | Melanoma, 609048                                                                                           | Cancer         | 79 |
|     | CDN1B                              | Multiple endocrine neoplasia, type IV, 610755                                                              | Cancer         | 79 |
|     | RB                                 | Bladder cancer, 109800                                                                                     | Cancer         | 79 |
|     | RB                                 | Retinoblastoma                                                                                             | Cancer         | 79 |
|     | HMGA2                              | Lipoma                                                                                                     | Cancer         | 79 |
|     | HMGA2                              | Lipomatosis, multiple, 151900                                                                              | Cancer         | 79 |
|     | HMGA2                              | Salivary adenoma                                                                                           | Cancer         | 79 |
|     | HMGA2                              | Uterine leiomyoma                                                                                          | Cancer         | 79 |
|     | HMGA2                              | Stature QTL 9, 611547                                                                                      | Cancer         | 79 |
|     | CCND2                              | Colorectal cancer                                                                                          | Cancer         | 79 |

|       |                                                             |                                                                  |                              |             |
|-------|-------------------------------------------------------------|------------------------------------------------------------------|------------------------------|-------------|
|       | CCND1                                                       | Multiple myeloma (IgH translocation)                             | Cancer                       | 79          |
|       | CCND1                                                       | Multiple myeloma (hyperdiploidy)                                 | Cancer                       | 79          |
|       | CDK6                                                        | Stature QTL 11, 612223                                           | Cancer                       | 79          |
| 65    | GRID2                                                       | Suicide attempts in bipolar disorder                             | Psychiatric                  | 80          |
|       | GRID2                                                       | Major depressive disorder (broad)                                | Psychiatric                  | 80          |
|       | BECN1                                                       | Depression (quantitative trait)                                  | Psychiatric                  | 80          |
|       | GOPC                                                        | Major depressive disorder                                        | Psychiatric                  | 80          |
|       | BCL2                                                        | Cardiac Troponin-T levels                                        | Psychiatric                  | 80          |
|       | GRID2                                                       | Pericardial fat                                                  | Psychiatric                  | 80          |
|       | BCL2                                                        | Coronary heart disease                                           | Psychiatric                  | 80          |
|       | BID                                                         | Coronary heart disease                                           | Psychiatric                  | 80          |
|       | GRID2                                                       | Coronary restenosis                                              | Psychiatric                  | 80          |
|       | GRID2                                                       | Coronary Artery Disease                                          | Psychiatric                  | 80          |
|       | BAD                                                         | Mean platelet volume                                             | Psychiatric                  | 80          |
|       | GRID2                                                       | Alzheimer`s disease                                              | Psychiatric                  | 80          |
|       | GRID2                                                       | Amyotrophic Lateral Sclerosis                                    | Psychiatric                  | 80          |
|       | GRID2                                                       | Cholesterol                                                      | Psychiatric                  | 80          |
|       | BIK                                                         | Cognitive impairment induced by topiramate                       | Psychiatric                  | 80          |
|       | 66                                                          | GRID2                                                            | Information processing speed | Psychiatric |
| GRID2 |                                                             | Job-related exhaustion                                           | Psychiatric                  | 80          |
| GRID2 |                                                             | Relative hand skill in reading disability                        | Psychiatric                  | 80          |
| GRID2 |                                                             | Intelligence                                                     | Psychiatric                  | 80          |
| CAC1C |                                                             | Brugada syndrome 3, 611875                                       | Cardiovascular               | 81          |
| CAC1C | Timothy syndrome, 601005                                    | Cardiovascular                                                   | 81                           |             |
| KCNN2 | Blood pressure, CVD RF and other traits                     | Cardiovascular                                                   | 81                           |             |
| KCNN2 | Coronary arterial lesions in patients with Kawasaki disease | Cardiovascular                                                   | 81                           |             |
| KCNQ2 | Blood pressure, CVD RF and other traits                     | Cardiovascular                                                   | 81                           |             |
| 67    | TWST1                                                       | Saethre-Chotzen syndrome with eyelid anomalies, 101400           | Hematological                | 82          |
|       | TWST1                                                       | Saethre-Chotzen syndrome, 101400                                 | Hematological                | 82          |
|       | ID1                                                         | Red blood cell traits                                            | Hematological                | 82          |
|       | TAL1                                                        | Red blood cell traits                                            | Hematological                | 82          |
| 68    | ERBB2                                                       | Ovarian cancer, somatic, 604370                                  | Cancer                       | 83          |
|       | KIT                                                         | Germ cell tumors, 273300                                         | Cancer                       | 83          |
|       | KIT                                                         | Mast cell leukemia                                               | Cancer                       | 83          |
|       | PK3CA                                                       | Breast cancer, somatic, 114480                                   | Cancer                       | 83          |
|       | PK3CA                                                       | Colorectal cancer, somatic, 114500                               | Cancer                       | 83          |
|       | PK3CA                                                       | Keratosis, seborrheic, somatic, 182000                           | Cancer                       | 83          |
|       | PK3CA                                                       | Ovarian cancer, somatic, 604370                                  | Cancer                       | 83          |
|       | NTF3                                                        | Response to gemcitabine or arabinosylcytosin in blood cell lines | Cancer                       | 83          |
|       | FYN                                                         | Breast cancer                                                    | Cancer                       | 83          |
|       | LAMA2                                                       | Methotrexate clearance (acute lymphoblastic leukemia)            | Cancer                       | 83          |
|       | LAMA2                                                       | Prostate cancer                                                  | Cancer                       | 83          |
|       | LAMA5                                                       | Colorectal cancer                                                | Cancer                       | 83          |
| WIPF1 | Methotrexate clearance (acute lymphoblastic leukemia)       | Cancer                                                           | 83                           |             |

|    |       |                                                                                                            |                |    |
|----|-------|------------------------------------------------------------------------------------------------------------|----------------|----|
|    | SYNJ2 | Colorectal cancer                                                                                          | Cancer         | 83 |
|    | FYN   | Endometrial cancer                                                                                         | Cancer         | 83 |
|    | BCR   | Response to platinum-based chemotherapy in small-cell lung cancer                                          | Cancer         | 83 |
|    | GRB2  | Response to taxane treatment (paclitaxel)                                                                  | Cancer         | 83 |
|    | ITSN1 | Response to taxane treatment (paclitaxel)                                                                  | Cancer         | 83 |
|    | LAMA2 | Chemotherapeutic response (cytarabine, 5' deoxyfluorouridine, carboplatin, cisplatin), in blood cell lines | Cancer         | 83 |
|    | SOS1  | Noonan syndrome 4, 610733                                                                                  | Cancer         | 83 |
|    | PTN11 | Leukemia, juvenile myelomonocytic, 607785                                                                  | Cancer         | 83 |
|    | CSF1R | Myeloid malignancy, predisposition to                                                                      | Cancer         | 83 |
|    | BCR   | Leukemia, acute lymphocytic                                                                                | Cancer         | 83 |
|    | BCR   | Leukemia, chronic myeloid, 608232                                                                          | Cancer         | 83 |
|    | KIT   | Leukemia, acute myeloid, 601626                                                                            | Cancer         | 83 |
|    | PTN11 | Noonan syndrome 1, 163950                                                                                  | Cancer         | 83 |
|    | RET   | Pheochromocytoma, 171300                                                                                   | Cancer         | 83 |
|    | ERBB2 | Gastric cancer, somatic, 137215                                                                            | Cancer         | 83 |
|    | KIT   | Gastrointestinal stromal tumor, somatic, 606764                                                            | Cancer         | 83 |
|    | PK3CA | Gastric cancer, somatic, 137215                                                                            | Cancer         | 83 |
|    | RET   | Medullary thyroid carcinoma, 155240                                                                        | Cancer         | 83 |
|    | RET   | Multiple endocrine neoplasia IIA, 171400                                                                   | Cancer         | 83 |
|    | RET   | Multiple endocrine neoplasia IIB, 162300                                                                   | Cancer         | 83 |
|    | SH21A | Lymphoproliferative syndrome, X-linked, 308240                                                             | Cancer         | 83 |
|    | WASP  | Wiskott-Aldrich syndrome, 301000                                                                           | Cancer         | 83 |
|    | PK3CA | Hepatocellular carcinoma, somatic, 114550                                                                  | Cancer         | 83 |
|    | ERBB2 | Glioblastoma, somatic, 137800                                                                              | Cancer         | 83 |
|    | ERBB2 | Adenocarcinoma of lung, somatic, 211980                                                                    | Cancer         | 83 |
|    | PK3CA | Nonsmall cell lung cancer, somatic, 211980                                                                 | Cancer         | 83 |
|    | PK3CA | Nevus, epidermal, 162900                                                                                   | Cancer         | 83 |
|    | BCR   | Oral cancers (chewing tobacco related)                                                                     | Cancer         | 83 |
|    | ITSN1 | Oral cancers (chewing tobacco related)                                                                     | Cancer         | 83 |
|    | CBLB  | Lymphocyte counts                                                                                          | Cancer         | 83 |
|    | DAG1  | Lymphocyte counts                                                                                          | Cancer         | 83 |
|    | FYB   | Lymphocyte counts                                                                                          | Cancer         | 83 |
|    | IRS1  | Lymphocyte counts                                                                                          | Cancer         | 83 |
|    | WASL  | Lymphocyte counts                                                                                          | Cancer         | 83 |
| 69 | CAV3  | Cardiomyopathy, familial hypertrophic, 192600                                                              | Cardiovascular | 83 |
|    | CAV3  | Long QT syndrome-9, 611818                                                                                 | Cardiovascular | 83 |
|    | IRS1  | Coronary artery disease, susceptibility to                                                                 | Cardiovascular | 83 |
|    | BTK   | Atrial fibrillation                                                                                        | Cardiovascular | 83 |
|    | CAV3  | HDL particle features                                                                                      | Cardiovascular | 83 |
|    | CD3E  | Response to statin treatment (atorvastatin), change in cholesterol levels                                  | Cardiovascular | 83 |
|    | FYN   | Response to statin treatment (atorvastatin), change in cholesterol levels                                  | Cardiovascular | 83 |
|    | SYNJ2 | Response to statin treatment (atorvastatin), change in cholesterol levels                                  | Cardiovascular | 83 |
|    | CD3E  | Heart Failure                                                                                              | Cardiovascular | 83 |
|    | CSF1R | Bicuspid aortic valve                                                                                      | Cardiovascular | 83 |

|    |       |                                                                                                                                                                                            |                |    |
|----|-------|--------------------------------------------------------------------------------------------------------------------------------------------------------------------------------------------|----------------|----|
|    | SYNJ2 | Tunica Media                                                                                                                                                                               | Cardiovascular | 83 |
|    | SYNJ2 | Heart Failure                                                                                                                                                                              | Cardiovascular | 83 |
|    | NTRK2 | Left ventricular mass                                                                                                                                                                      | Cardiovascular | 83 |
|    | FYB   | Blood pressure (response to angiotensin II receptor blocker)                                                                                                                               | Cardiovascular | 83 |
|    | FYN   | Blood pressure, CVD RF and other traits (body mass index (BMI), waist:hip ratio, renin activity in plasma, aldosterone concentration in plasma, BNP levels in plasma, alcohol consumption) | Cardiovascular | 83 |
|    | FYN   | Systolic blood pressure                                                                                                                                                                    | Cardiovascular | 83 |
|    | GAB1  | Potassium levels                                                                                                                                                                           | Cardiovascular | 83 |
|    | LAMA2 | Blood pressure, CVD RF and other traits (body mass index (BMI), waist:hip ratio, renin activity in plasma, aldosterone concentration in plasma, BNP levels in plasma, alcohol consumption) | Cardiovascular | 83 |
|    | RET   | Hypertension                                                                                                                                                                               | Cardiovascular | 83 |
|    | SOS1  | Blood pressure, CVD RF and other traits (body mass index (BMI), waist:hip ratio, renin activity in plasma, aldosterone concentration in plasma, BNP levels in plasma, alcohol consumption) | Cardiovascular | 83 |
|    | LAMA2 | Chemotherapeutic response (cytarabine, 5' deoxyfluorouridine, carboplatin, cisplatin), in blood cell lines                                                                                 | Cardiovascular | 83 |
|    | SOS1  | Noonan syndrome 4, 610733                                                                                                                                                                  | Cardiovascular | 83 |
|    | PTN11 | Noonan syndrome 1, 163950                                                                                                                                                                  | Cardiovascular | 83 |
|    | IRS1  | Sudden cardiac arrest                                                                                                                                                                      | Cardiovascular | 83 |
|    | SF3B4 | White blood cell count                                                                                                                                                                     | Cardiovascular | 83 |
|    | CBL   | Platelet counts                                                                                                                                                                            | Cardiovascular | 83 |
|    | FYN   | Coronary heart disease                                                                                                                                                                     | Cardiovascular | 83 |
|    | LAMA2 | Coronary Artery Disease                                                                                                                                                                    | Cardiovascular | 83 |
|    | NTRK2 | Coronary heart disease                                                                                                                                                                     | Cardiovascular | 83 |
|    | NTRK3 | Coronary heart disease                                                                                                                                                                     | Cardiovascular | 83 |
|    | BLNK  | Coronary heart disease                                                                                                                                                                     | Cardiovascular | 83 |
|    | GAB2  | Menarche (age at onset)                                                                                                                                                                    | Cardiovascular | 83 |
|    | GAB1  | Response to statin therapy                                                                                                                                                                 | Cardiovascular | 83 |
|    | GRAP2 | Response to statin therapy                                                                                                                                                                 | Cardiovascular | 83 |
|    | PTN11 | Leopard syndrome, 151100                                                                                                                                                                   | Cardiovascular | 83 |
|    | LAMA2 | Muscular dystrophy, congenital merosin-deficient, 607855                                                                                                                                   | Cardiovascular | 83 |
|    | LAMA2 | Muscular dystrophy, congenital, due to partial LAMA2 deficiency, 607855                                                                                                                    | Cardiovascular | 83 |
|    | NTRK3 | Gaucher disease severity                                                                                                                                                                   | Cardiovascular | 83 |
|    | CBLB  | Lymphocyte counts                                                                                                                                                                          | Cardiovascular | 83 |
|    | DAG1  | Lymphocyte counts                                                                                                                                                                          | Cardiovascular | 83 |
|    | FYB   | Lymphocyte counts                                                                                                                                                                          | Cardiovascular | 83 |
|    | IRS1  | Lymphocyte counts                                                                                                                                                                          | Cardiovascular | 83 |
|    | WASL  | Lymphocyte counts                                                                                                                                                                          | Cardiovascular | 83 |
| 70 | IRS1  | Diabetes mellitus, noninsulin-dependent, 125853                                                                                                                                            | Endocrine      | 83 |
|    | ERBB3 | Polycystic ovary syndrome                                                                                                                                                                  | Endocrine      | 83 |
|    | ERBB3 | Type 1 diabetes                                                                                                                                                                            | Endocrine      | 83 |
|    | ERBB3 | Type 1 diabetes autoantibodies                                                                                                                                                             | Endocrine      | 83 |
|    | FYN   | Insulin-related traits                                                                                                                                                                     | Endocrine      | 83 |
|    | HCK   | Metabolite levels                                                                                                                                                                          | Endocrine      | 83 |
|    | LAMA2 | Type 2 diabetes                                                                                                                                                                            | Endocrine      | 83 |
|    | LAMA5 | Type 2 diabetes                                                                                                                                                                            | Endocrine      | 83 |

|    |       |                                                                                                                                                                                            |               |    |
|----|-------|--------------------------------------------------------------------------------------------------------------------------------------------------------------------------------------------|---------------|----|
|    | LCP2  | Type 2 diabetes                                                                                                                                                                            | Endocrine     | 83 |
|    | NTF3  | Type 2 diabetes                                                                                                                                                                            | Endocrine     | 83 |
|    | NTRK2 | Insulin-related traits                                                                                                                                                                     | Endocrine     | 83 |
|    | NTRK3 | Type 2 diabetes                                                                                                                                                                            | Endocrine     | 83 |
|    | ITSN1 | Insulin resistance                                                                                                                                                                         | Endocrine     | 83 |
|    | ITSN1 | Type 2 diabetes                                                                                                                                                                            | Endocrine     | 83 |
|    | SOS1  | Type 2 diabetes                                                                                                                                                                            | Endocrine     | 83 |
|    | SOS1  | Insulin resistance                                                                                                                                                                         | Endocrine     | 83 |
|    | WIPF1 | Insulin-related traits                                                                                                                                                                     | Endocrine     | 83 |
|    | SKAP2 | Type 2 diabetes                                                                                                                                                                            | Endocrine     | 83 |
|    | SKAP2 | Type 1 diabetes                                                                                                                                                                            | Endocrine     | 83 |
|    | ITSN2 | Type 2 diabetes                                                                                                                                                                            | Endocrine     | 83 |
|    | SOS1  | Noonan syndrome 4, 610733                                                                                                                                                                  | Endocrine     | 83 |
|    | RET   | Pheochromocytoma, 171300                                                                                                                                                                   | Endocrine     | 83 |
|    | RET   | Medullary thyroid carcinoma, 155240                                                                                                                                                        | Endocrine     | 83 |
|    | RET   | Multiple endocrine neoplasia IIA, 171400                                                                                                                                                   | Endocrine     | 83 |
|    | RET   | Multiple endocrine neoplasia IIB, 162300                                                                                                                                                   | Endocrine     | 83 |
|    | BTK   | XLA and isolated growth hormone deficiency, 307200                                                                                                                                         | Endocrine     | 83 |
|    | GAB2  | Menarche (age at onset)                                                                                                                                                                    | Endocrine     | 83 |
| 71 | CSF1R | Adverse response to chemotherapy (neutropenia/leucopenia) (doxorubicin)                                                                                                                    | Hematological | 83 |
|    | LAMA2 | Adverse response to chemotherapy (neutropenia/leucopenia) (doxorubicin)                                                                                                                    | Hematological | 83 |
|    | NTRK3 | Adverse response to chemotherapy (neutropenia/leucopenia) (epirubicin)                                                                                                                     | Hematological | 83 |
|    | GAB2  | Self-reported allergy                                                                                                                                                                      | Hematological | 83 |
|    | CSF1R | Atopy                                                                                                                                                                                      | Hematological | 83 |
|    | PTN11 | Leukemia, juvenile myelomonocytic, 607785                                                                                                                                                  | Hematological | 83 |
|    | CSF1R | Myeloid malignancy, predisposition to                                                                                                                                                      | Hematological | 83 |
|    | BCR   | Leukemia, acute lymphocytic                                                                                                                                                                | Hematological | 83 |
|    | BCR   | Leukemia, chronic myeloid, 608232                                                                                                                                                          | Hematological | 83 |
|    | KIT   | Leukemia, acute myeloid, 601626                                                                                                                                                            | Hematological | 83 |
|    | SH21A | Lymphoproliferative syndrome, X-linked, 308240                                                                                                                                             | Hematological | 83 |
|    | WASP  | Wiskott-Aldrich syndrome, 301000                                                                                                                                                           | Hematological | 83 |
|    | NTRK2 | Left ventricular mass                                                                                                                                                                      | Hematological | 83 |
|    | FYB   | Blood pressure (response to angiotensin II receptor blocker)                                                                                                                               | Hematological | 83 |
|    | FYN   | Blood pressure, CVD RF and other traits (body mass index (BMI), waist:hip ratio, renin activity in plasma, aldosterone concentration in plasma, BNP levels in plasma, alcohol consumption) | Hematological | 83 |
|    | FYN   | Systolic blood pressure                                                                                                                                                                    | Hematological | 83 |
|    | GAB1  | Potassium levels                                                                                                                                                                           | Hematological | 83 |
|    | LAMA2 | Blood pressure, CVD RF and other traits (body mass index (BMI), waist:hip ratio, renin activity in plasma, aldosterone concentration in plasma, BNP levels in plasma, alcohol consumption) | Hematological | 83 |
|    | RET   | Hypertension                                                                                                                                                                               | Hematological | 83 |
|    | SOS1  | Blood pressure, CVD RF and other traits (body mass index (BMI), waist:hip ratio, renin activity in plasma, aldosterone concentration in plasma, BNP levels in plasma, alcohol consumption) | Hematological | 83 |
|    | BTK   | Agammaglobulinemia, type 1, X-linked                                                                                                                                                       | Hematological | 83 |
|    | EPOR  | Erythrocytosis, familial, 133100                                                                                                                                                           | Hematological | 83 |

|       |                              |                                                                                                            |                  |    |
|-------|------------------------------|------------------------------------------------------------------------------------------------------------|------------------|----|
|       | WASP                         | Neutropenia, severe congenital, X-linked, 300299                                                           | Hematological    | 83 |
|       | WASP                         | Thrombocytopenia, X-linked, 313900                                                                         | Hematological    | 83 |
|       | WASP                         | Thrombocytopenia, X-linked, intermittent, 313900                                                           | Hematological    | 83 |
|       | BTK                          | XLA and isolated growth hormone deficiency, 307200                                                         | Hematological    | 83 |
|       | SF3B4                        | White blood cell count                                                                                     | Hematological    | 83 |
|       | CBL                          | Platelet counts                                                                                            | Hematological    | 83 |
| 72    | DAG1                         | Crohn`s disease                                                                                            | Gastrointestinal | 83 |
|       | RET                          | Hirschsprung`s disease                                                                                     | Gastrointestinal | 83 |
|       | SKAP2                        | Crohn`s disease                                                                                            | Gastrointestinal | 83 |
|       | CBLB                         | Celiac disease                                                                                             | Gastrointestinal | 83 |
|       | LAMA2                        | Celiac disease                                                                                             | Gastrointestinal | 83 |
|       | CBLB                         | Gallstones                                                                                                 | Gastrointestinal | 83 |
|       | NTRK2                        | Gallstones                                                                                                 | Gastrointestinal | 83 |
|       | ERBB2                        | Tooth agenesis (mandibular third molar)                                                                    | Gastrointestinal | 83 |
|       | LAMA2                        | Chemotherapeutic response (cytarabine, 5` deoxyfluorouridine, carboplatin, cisplatin), in blood cell lines | Gastrointestinal | 83 |
|       | ERBB2                        | Gastric cancer, somatic, 137215                                                                            | Gastrointestinal | 83 |
|       | KIT                          | Gastrointestinal stromal tumor, somatic, 606764                                                            | Gastrointestinal | 83 |
|       | PK3CA                        | Gastric cancer, somatic, 137215                                                                            | Gastrointestinal | 83 |
|       | RET                          | Medullary thyroid carcinoma, 155240                                                                        | Gastrointestinal | 83 |
|       | RET                          | Multiple endocrine neoplasia IIA, 171400                                                                   | Gastrointestinal | 83 |
|       | RET                          | Multiple endocrine neoplasia IIB, 162300                                                                   | Gastrointestinal | 83 |
|       | NTRK2                        | Chronic Hepatitis C infection                                                                              | Gastrointestinal | 83 |
|       | IRS1                         | Sudden cardiac arrest                                                                                      | Gastrointestinal | 83 |
|       | SF3B4                        | White blood cell count                                                                                     | Gastrointestinal | 83 |
|       | CBL                          | Platelet counts                                                                                            | Gastrointestinal | 83 |
|       | FYN                          | Coronary heart disease                                                                                     | Gastrointestinal | 83 |
|       | LAMA2                        | Coronary Artery Disease                                                                                    | Gastrointestinal | 83 |
|       | NTRK2                        | Coronary heart disease                                                                                     | Gastrointestinal | 83 |
|       | NTRK3                        | Coronary heart disease                                                                                     | Gastrointestinal | 83 |
| BLNK  | Coronary heart disease       | Gastrointestinal                                                                                           | 83               |    |
| GAB1  | Response to statin therapy   | Gastrointestinal                                                                                           | 83               |    |
| GRAP2 | Response to statin therapy   | Gastrointestinal                                                                                           | 83               |    |
| RET   | Hirschsprung disease, 142623 | Gastrointestinal                                                                                           | 83               |    |
| 73    | ITSN1                        | HIV-1 viral setpoint                                                                                       | Immunological    | 83 |
|       | GRAP2                        | HIV-1 progression                                                                                          | Immunological    | 83 |
|       | BCR                          | Immune response to smallpox vaccine (IL-6)                                                                 | Immunological    | 83 |
|       | CD3E                         | Immunodeficiency due to defect in CD3-epsilon                                                              | Immunological    | 83 |
|       | BLNK                         | Hypoglobulinemia and absent B cells                                                                        | Immunological    | 83 |
|       | GAB2                         | Self-reported allergy                                                                                      | Immunological    | 83 |
|       | CSF1R                        | Atopy                                                                                                      | Immunological    | 83 |
|       | BCR                          | Leukemia, acute lymphocytic                                                                                | Immunological    | 83 |
|       | BCR                          | Leukemia, chronic myeloid, 608232                                                                          | Immunological    | 83 |
|       | KIT                          | Leukemia, acute myeloid, 601626                                                                            | Immunological    | 83 |
|       | SH21A                        | Lymphoproliferative syndrome, X-linked, 308240                                                             | Immunological    | 83 |

|       |                           |                                                                    |               |    |
|-------|---------------------------|--------------------------------------------------------------------|---------------|----|
|       | WASP                      | Wiskott-Aldrich syndrome, 301000                                   | Immunological | 83 |
|       | KIT                       | Mastocytosis with associated hematologic disorder                  | Immunological | 83 |
|       | CBLB                      | Celiac disease                                                     | Immunological | 83 |
|       | LAMA2                     | Celiac disease                                                     | Immunological | 83 |
|       | NTRK2                     | Chronic Hepatitis C infection                                      | Immunological | 83 |
|       | CBL                       | Platelet counts                                                    | Immunological | 83 |
|       | GRB2                      | Systemic lupus erythematosus and Systemic sclerosis                | Immunological | 83 |
|       | NTRK3                     | Odorant perception                                                 | Immunological | 83 |
|       | NTF3                      | Myasthenia gravis                                                  | Immunological | 83 |
|       | PLCG1                     | Taste perception                                                   | Immunological | 83 |
|       | CBLB                      | Lymphocyte counts                                                  | Immunological | 83 |
|       | DAG1                      | Lymphocyte counts                                                  | Immunological | 83 |
|       | FYB                       | Lymphocyte counts                                                  | Immunological | 83 |
|       | IRS1                      | Lymphocyte counts                                                  | Immunological | 83 |
|       | WASL                      | Lymphocyte counts                                                  | Immunological | 83 |
|       | ITK                       | Alopecia areata                                                    | Immunological | 83 |
|       | ITSN2                     | Male-pattern baldness                                              | Immunological | 83 |
| 74    | BTK                       | Urinary metabolites                                                | Renal         | 83 |
|       | CBL                       | Urinary metabolites                                                | Renal         | 83 |
|       | ERBB2                     | Urinary metabolites                                                | Renal         | 83 |
|       | FYN                       | Urinary metabolites                                                | Renal         | 83 |
|       | LAMA5                     | Urinary metabolites                                                | Renal         | 83 |
|       | NTRK2                     | Urinary metabolites                                                | Renal         | 83 |
|       | NTRK3                     | Urinary metabolites                                                | Renal         | 83 |
|       | SOS1                      | Urinary metabolites                                                | Renal         | 83 |
|       | SKAP2                     | Urinary metabolites                                                | Renal         | 83 |
|       | DOK5                      | Urinary metabolites                                                | Renal         | 83 |
|       | SOS1                      | Noonan syndrome 4, 610733                                          | Renal         | 83 |
|       | CBLB                      | Gallstones                                                         | Renal         | 83 |
|       | NTRK2                     | Gallstones                                                         | Renal         | 83 |
|       | NTRK3                     | Amyotrophic Lateral Sclerosis                                      | Renal         | 83 |
|       | SYNJ2                     | Amyotrophic Lateral Sclerosis                                      | Renal         | 83 |
|       | FRS2                      | Amyotrophic Lateral Sclerosis                                      | Renal         | 83 |
|       | RET                       | Renal agenesis, 191830                                             | Renal         | 83 |
|       | PODO                      | Nephrotic syndrome, steroid-resistant, autosomal recessive, 600995 | Renal         | 83 |
|       | NPHN                      | Nephrosis-1, congenital, Finnish type, 256300                      | Renal         | 83 |
|       | GRB2                      | Systemic lupus erythematosus and Systemic sclerosis                | Renal         | 83 |
| PTN11 | Noonan syndrome 1, 163950 | Renal                                                              | 83            |    |
| 75    | DAG1                      | Bipolar disorder, schizoaffective                                  | Psychiatric   | 83 |
|       | NTRK3                     | Bipolar disorder                                                   | Psychiatric   | 83 |
|       | GRAP2                     | Bipolar disorder                                                   | Psychiatric   | 83 |
|       | GRAP2                     | Bipolar disorder and schizophrenia                                 | Psychiatric   | 83 |
|       | BCR                       | Major depressive disorder                                          | Psychiatric   | 83 |
|       | LAMA2                     | Response to citalopram treatment                                   | Psychiatric   | 83 |

|       |                                                                                                                                               |             |    |
|-------|-----------------------------------------------------------------------------------------------------------------------------------------------|-------------|----|
| NTF3  | Major depressive disorder                                                                                                                     | Psychiatric | 83 |
| NTRK2 | Suicide attempts in bipolar disorder                                                                                                          | Psychiatric | 83 |
| NTRK3 | Suicide attempts in bipolar disorder                                                                                                          | Psychiatric | 83 |
| NTRK3 | Brain derived neurotrophic factor levels, in serum                                                                                            | Psychiatric | 83 |
| PLCG1 | Suicidal ideation                                                                                                                             | Psychiatric | 83 |
| WIPF1 | Brain derived neurotrophic factor levels, in serum                                                                                            | Psychiatric | 83 |
| DOK5  | Functional MRI                                                                                                                                | Psychiatric | 83 |
| NTRK3 | Tourette syndrome                                                                                                                             | Psychiatric | 83 |
| NTRK3 | Schizophrenia                                                                                                                                 | Psychiatric | 83 |
| ITSN2 | Response to antipsychotic treatment in schizophrenia (working memory)                                                                         | Psychiatric | 83 |
| NTRK2 | Nicotine smoking                                                                                                                              | Psychiatric | 83 |
| IRS1  | Sudden cardiac arrest                                                                                                                         | Psychiatric | 83 |
| SF3B4 | White blood cell count                                                                                                                        | Psychiatric | 83 |
| CBL   | Platelet counts                                                                                                                               | Psychiatric | 83 |
| FYN   | Coronary heart disease                                                                                                                        | Psychiatric | 83 |
| LAMA2 | Coronary Artery Disease                                                                                                                       | Psychiatric | 83 |
| NTRK2 | Coronary heart disease                                                                                                                        | Psychiatric | 83 |
| NTRK3 | Coronary heart disease                                                                                                                        | Psychiatric | 83 |
| BLNK  | Coronary heart disease                                                                                                                        | Psychiatric | 83 |
| CBLB  | Alzheimer` s disease                                                                                                                          | Psychiatric | 83 |
| CSF1R | Alzheimer` s disease (late onset)                                                                                                             | Psychiatric | 83 |
| NTRK2 | Alzheimer` s disease (late onset)                                                                                                             | Psychiatric | 83 |
| RET   | Alzheimer` s disease (late onset)                                                                                                             | Psychiatric | 83 |
| GAB2  | Alzheimer` s disease                                                                                                                          | Psychiatric | 83 |
| GAB2  | Alzheimer` s disease (late onset)                                                                                                             | Psychiatric | 83 |
| ITSN2 | Alzheimer` s disease                                                                                                                          | Psychiatric | 83 |
| DOK5  | Alzheimer` s disease                                                                                                                          | Psychiatric | 83 |
| NTRK3 | Amyotrophic Lateral Sclerosis                                                                                                                 | Psychiatric | 83 |
| SYNJ2 | Amyotrophic Lateral Sclerosis                                                                                                                 | Psychiatric | 83 |
| FRS2  | Amyotrophic Lateral Sclerosis                                                                                                                 | Psychiatric | 83 |
| GAB2  | Menarche (age at onset)                                                                                                                       | Psychiatric | 83 |
| NTRK3 | Autism spectrum disorder, attention deficit-hyperactivity disorder, bipolar disorder, major depressive disorder, and schizophrenia (combined) | Psychiatric | 83 |
| FYB   | Alcohol and nictotine co-dependence                                                                                                           | Psychiatric | 83 |
| ITK   | Alcohol dependence                                                                                                                            | Psychiatric | 83 |
| LAMA2 | Alcohol dependence                                                                                                                            | Psychiatric | 83 |
| LAMA2 | Substance dependence                                                                                                                          | Psychiatric | 83 |
| NTF3  | Alcoholism (heaviness of drinking)                                                                                                            | Psychiatric | 83 |
| NTRK2 | Alcohol consumption                                                                                                                           | Psychiatric | 83 |
| NTRK2 | Alcohol dependence                                                                                                                            | Psychiatric | 83 |
| NTRK3 | Alcohol dependence                                                                                                                            | Psychiatric | 83 |
| NTRK2 | Heroin addiction                                                                                                                              | Psychiatric | 83 |
| SYNJ2 | Alcohol dependence                                                                                                                            | Psychiatric | 83 |
| NTRK3 | Creutzfeldt-Jakob disease (variant)                                                                                                           | Psychiatric | 83 |
| GAB1  | Response to statin therapy                                                                                                                    | Psychiatric | 83 |

|       |                                                                                                                                               |              |    |
|-------|-----------------------------------------------------------------------------------------------------------------------------------------------|--------------|----|
| GRAP2 | Response to statin therapy                                                                                                                    | Psychiatric  | 83 |
| BTK   | Parkinson`s disease                                                                                                                           | Psychiatric  | 83 |
| FYN   | Parkinson`s disease                                                                                                                           | Psychiatric  | 83 |
| NTF3  | Parkinson`s disease                                                                                                                           | Psychiatric  | 83 |
| HIP1R | Parkinson`s disease                                                                                                                           | Psychiatric  | 83 |
| ITSN2 | Parkinson`s disease                                                                                                                           | Psychiatric  | 83 |
| BCR   | Cognitive test performance                                                                                                                    | Psychiatric  | 83 |
| CBL   | Personality dimensions                                                                                                                        | Psychiatric  | 83 |
| FYB   | Cognitive impairment induced by topiramate                                                                                                    | Psychiatric  | 83 |
| ITK   | Personality dimensions                                                                                                                        | Psychiatric  | 83 |
| LAMA2 | Cognitive decline                                                                                                                             | Psychiatric  | 83 |
| NTF3  | Cognitive performance                                                                                                                         | Psychiatric  | 83 |
| NTF3  | Cognitive impairment induced by topiramate                                                                                                    | Psychiatric  | 83 |
| NTRK3 | Cognitive test performance                                                                                                                    | Psychiatric  | 83 |
| RET   | Cognitive test performance                                                                                                                    | Psychiatric  | 83 |
| WASL  | Information processing speed                                                                                                                  | Psychiatric  | 83 |
| FRS2  | Personality dimensions                                                                                                                        | Psychiatric  | 83 |
| DOK5  | Cognitive decline                                                                                                                             | Psychiatric  | 83 |
| BCR   | Narcolepsy                                                                                                                                    | Psychiatric  | 83 |
| NTRK2 | Volumetric brain MRI                                                                                                                          | Psychiatric  | 83 |
| NTRK3 | Volumetric brain MRI                                                                                                                          | Psychiatric  | 83 |
| AATF  | Neuroticism                                                                                                                                   | Psychiatric  | 83 |
| DOK5  | Intelligence (childhood)                                                                                                                      | Psychiatric  | 83 |
| ERBB2 | Glioblastoma, somatic, 137800                                                                                                                 | Neurological | 83 |
| NTRK3 | Creutzfeldt-Jakob disease (variant)                                                                                                           | Neurological | 83 |
| NTRK3 | Schizophrenia                                                                                                                                 | Neurological | 83 |
| ITSN2 | Response to antipsychotic treatment in schizophrenia (working memory)                                                                         | Neurological | 83 |
| CBLB  | Alzheimer`s disease                                                                                                                           | Neurological | 83 |
| CSF1R | Alzheimer`s disease (late onset)                                                                                                              | Neurological | 83 |
| NTRK2 | Alzheimer`s disease (late onset)                                                                                                              | Neurological | 83 |
| RET   | Alzheimer`s disease (late onset)                                                                                                              | Neurological | 83 |
| GAB2  | Alzheimer`s disease                                                                                                                           | Neurological | 83 |
| GAB2  | Alzheimer`s disease (late onset)                                                                                                              | Neurological | 83 |
| ITSN2 | Alzheimer`s disease                                                                                                                           | Neurological | 83 |
| DOK5  | Alzheimer`s disease                                                                                                                           | Neurological | 83 |
| NTRK3 | Amyotrophic Lateral Sclerosis                                                                                                                 | Neurological | 83 |
| SYNJ2 | Amyotrophic Lateral Sclerosis                                                                                                                 | Neurological | 83 |
| FRS2  | Amyotrophic Lateral Sclerosis                                                                                                                 | Neurological | 83 |
| GAB2  | Menarche (age at onset)                                                                                                                       | Neurological | 83 |
| NTRK3 | Autism spectrum disorder, attention deficit-hyperactivity disorder, bipolar disorder, major depressive disorder, and schizophrenia (combined) | Neurological | 83 |
| NTRK3 | Statin-induced myopathy                                                                                                                       | Neurological | 83 |
| GAB1  | Response to statin therapy                                                                                                                    | Neurological | 83 |
| GRAP2 | Response to statin therapy                                                                                                                    | Neurological | 83 |
| CAV3  | Rippling muscle disease, 606072                                                                                                               | Neurological | 83 |

|       |                                                                         |              |    |
|-------|-------------------------------------------------------------------------|--------------|----|
| TAU   | Tauopathy and respiratory failure                                       | Neurological | 83 |
| 1433E | Miller-Dieker lissencephaly, 247200                                     | Neurological | 83 |
| PTN11 | Leopard syndrome, 151100                                                | Neurological | 83 |
| TAU   | Supranuclear palsy, progressive atypical, 260540                        | Neurological | 83 |
| TAU   | Supranuclear palsy, progressive, 601104                                 | Neurological | 83 |
| RET   | Hirschsprung disease, 142623                                            | Neurological | 83 |
| TAU   | Dementia, frontotemporal, with or without parkinsonism, 600274          | Neurological | 83 |
| TAU   | Pick disease, 172700                                                    | Neurological | 83 |
| TAU   | Parkinson disease, 168600                                               | Neurological | 83 |
| DYN2  | Charcot-Marie-Tooth disease, dominant intermediate B, 606482            | Neurological | 83 |
| CAV3  | Muscular dystrophy, limb-girdle, type IC, 607801                        | Neurological | 83 |
| CAV3  | Myopathy, distal, with decreased caveolin 3                             | Neurological | 83 |
| LAMA2 | Muscular dystrophy, congenital merosin-deficient, 607855                | Neurological | 83 |
| LAMA2 | Muscular dystrophy, congenital, due to partial LAMA2 deficiency, 607855 | Neurological | 83 |
| RET   | Central hypoventilation syndrome, congenital, 209880                    | Neurological | 83 |
| CBLB  | Multiple sclerosis                                                      | Neurological | 83 |
| ERBB3 | Multiple sclerosis                                                      | Neurological | 83 |
| LAMA2 | Partial epilepsies                                                      | Neurological | 83 |
| SKAP2 | Multiple sclerosis                                                      | Neurological | 83 |
| WASL  | Migraine                                                                | Neurological | 83 |
| BTK   | Parkinson`s disease                                                     | Neurological | 83 |
| FYN   | Parkinson`s disease                                                     | Neurological | 83 |
| NTF3  | Parkinson`s disease                                                     | Neurological | 83 |
| HIP1R | Parkinson`s disease                                                     | Neurological | 83 |
| ITSN2 | Parkinson`s disease                                                     | Neurological | 83 |
| NTRK3 | Odorant perception                                                      | Neurological | 83 |
| BCR   | Cognitive test performance                                              | Neurological | 83 |
| CBL   | Personality dimensions                                                  | Neurological | 83 |
| FYB   | Cognitive impairment induced by topiramate                              | Neurological | 83 |
| ITK   | Personality dimensions                                                  | Neurological | 83 |
| LAMA2 | Cognitive decline                                                       | Neurological | 83 |
| NTF3  | Cognitive performance                                                   | Neurological | 83 |
| NTF3  | Cognitive impairment induced by topiramate                              | Neurological | 83 |
| NTRK3 | Cognitive test performance                                              | Neurological | 83 |
| RET   | Cognitive test performance                                              | Neurological | 83 |
| WASL  | Information processing speed                                            | Neurological | 83 |
| FRS2  | Personality dimensions                                                  | Neurological | 83 |
| DOK5  | Cognitive decline                                                       | Neurological | 83 |
| NTRK3 | Gaucher disease severity                                                | Neurological | 83 |
| NTF3  | Myasthenia gravis                                                       | Neurological | 83 |
| PLCG1 | Taste perception                                                        | Neurological | 83 |
| BCR   | Narcolepsy                                                              | Neurological | 83 |
| NTRK2 | Volumetric brain MRI                                                    | Neurological | 83 |
| NTRK3 | Volumetric brain MRI                                                    | Neurological | 83 |

|    |       |                                                                                     |              |    |
|----|-------|-------------------------------------------------------------------------------------|--------------|----|
|    | AATF  | Neuroticism                                                                         | Neurological | 83 |
|    | DOK5  | Intelligence (childhood)                                                            | Neurological | 83 |
|    | DYN2  | Myopathy, centronuclear, 160150                                                     | Neurological | 83 |
|    | BCR   | Lung function (forced expiratory volume in 1 second to forced vital capacity ratio) | Respiratory  | 83 |
|    | BCR   | Acute lung injury                                                                   | Respiratory  | 83 |
|    | CD3E  | Lung function (forced expiratory volume in 1 second to forced vital capacity ratio) | Respiratory  | 83 |
|    | CD3E  | Lung function (forced expiratory flow between 25% and 75% of forced vital capacity) | Respiratory  | 83 |
|    | ERBB2 | Asthma                                                                              | Respiratory  | 83 |
|    | ERBB3 | Asthma                                                                              | Respiratory  | 83 |
|    | GAB1  | Asthma                                                                              | Respiratory  | 83 |
|    | NTRK2 | Lung function (forced vital capacity)                                               | Respiratory  | 83 |
|    | NTRK3 | Lung function (forced expiratory volume in 1 second)                                | Respiratory  | 83 |
|    | NTRK3 | Lung function (forced vital capacity)                                               | Respiratory  | 83 |
|    | ITSN1 | Lung function (forced vital capacity)                                               | Respiratory  | 83 |
|    | SKAP2 | Lung function (forced vital capacity)                                               | Respiratory  | 83 |
|    | CBLB  | Lymphocyte counts                                                                   | Respiratory  | 83 |
|    | DAG1  | Lymphocyte counts                                                                   | Respiratory  | 83 |
|    | FYB   | Lymphocyte counts                                                                   | Respiratory  | 83 |
|    | IRS1  | Lymphocyte counts                                                                   | Respiratory  | 83 |
|    | WASL  | Lymphocyte counts                                                                   | Respiratory  | 83 |
|    | RET   | Smoking behavior                                                                    | Respiratory  | 83 |
|    | ERBB3 | Lethal congenital contractural syndrome 2, 607598                                   | Respiratory  | 83 |
|    | CSF1R | Response to TNF antagonist treatment                                                | Respiratory  | 83 |
|    | ITK   | Rheumatoid arthritis                                                                | Respiratory  | 83 |
|    | NTRK2 | Rheumatoid arthritis                                                                | Respiratory  | 83 |
|    | BCR   | Response to platinum-based chemotherapy in small-cell lung cancer                   | Respiratory  | 83 |
|    | GRB2  | Response to taxane treatment (paclitaxel)                                           | Respiratory  | 83 |
|    | ITSN1 | Response to taxane treatment (paclitaxel)                                           | Respiratory  | 83 |
|    | GRB2  | Systemic lupus erythematosus and Systemic sclerosis                                 | Respiratory  | 83 |
|    | RET   | Central hypoventilation syndrome, congenital, 209880                                | Respiratory  | 83 |
| 77 | NTRK3 | Gaucher disease severity                                                            | Respiratory  | 83 |
|    | ARHG6 | Mental retardation, X-linked nonspecific, type 46, 300436                           | Neurological | 85 |
|    | PAK1  | Parkinson`s disease                                                                 | Neurological | 85 |
|    | PAK3  | Mental retardation, X-linked 30, 300558                                             | Neurological | 85 |
| 78 | PARD3 | Parkinson`s disease (motor and cognition)                                           | Neurological | 85 |
|    | PAK1  | Pure-tone audiometry                                                                | Neurological | 85 |
|    | WASF1 | Cognitive decline                                                                   | Neurological | 85 |
|    | PARD3 | Cognitive test performance                                                          | Neurological | 85 |
|    | DAB1  | Methotrexate clearance (acute lymphoblastic leukemia)                               | Cancer       | 88 |
|    | DAB1  | Prostate cancer                                                                     | Cancer       | 88 |
|    | DAB1  | Mammographic density                                                                | Cancer       | 88 |
|    | SNX17 | Breast size                                                                         | Cancer       | 88 |
|    | APBB3 | Prostate cancer                                                                     | Cancer       | 88 |

|       |                                                 |                                                                                                            |                |    |
|-------|-------------------------------------------------|------------------------------------------------------------------------------------------------------------|----------------|----|
| 79    | LRP1                                            | Endometrial cancer                                                                                         | Cancer         | 88 |
|       | APBA2                                           | Response to platinum-based chemotherapy in small cell and non-small cell lung cancers                      | Cancer         | 88 |
|       | DAB1                                            | Non-small cell lung cancer                                                                                 | Cancer         | 88 |
|       | DAB1                                            | Response to taxane treatment (paclitaxel)                                                                  | Cancer         | 88 |
|       | VLDLR                                           | Lung adenocarcinoma                                                                                        | Cancer         | 88 |
|       | LRP8                                            | Response to taxane treatment (paclitaxel)                                                                  | Cancer         | 88 |
|       | LDLR                                            | Multiple cancers (lung cancer, gastric cancer, and squamous cell carcinoma)                                | Cancer         | 88 |
|       | DAB1                                            | Chemotherapeutic response (cytarabine, 5' deoxyfluorouridine, carboplatin, cisplatin), in blood cell lines | Cancer         | 88 |
|       | DAB1                                            | Acute lymphoblastic leukemia (childhood)                                                                   | Cancer         | 88 |
|       | APBA2                                           | Response to mTOR inhibitor (rapamycin)                                                                     | Cancer         | 88 |
| DAB1  | Response to mTOR inhibitor (rapamycin)          | Cancer                                                                                                     | 88             |    |
| 80    | LRP8                                            | Myocardial infarction, susceptibility to, 608446                                                           | Cardiovascular | 88 |
|       | DAB1                                            | Response to statin treatment (atorvastatin), change in cholesterol levels                                  | Cardiovascular | 88 |
|       | DAB1                                            | QT interval                                                                                                | Cardiovascular | 88 |
|       | DAB1                                            | Antineutrophil cytoplasmic antibody-associated vasculitis                                                  | Cardiovascular | 88 |
|       | LDLR                                            | Carotid intima media thickness                                                                             | Cardiovascular | 88 |
|       | LDLR                                            | Cardiovascular disease risk factors                                                                        | Cardiovascular | 88 |
|       | LDLR                                            | Abdominal aortic aneurysm                                                                                  | Cardiovascular | 88 |
|       | LDLR                                            | LDL lipoproteins                                                                                           | Cardiovascular | 88 |
|       | LDLR                                            | Cardiovascular disease                                                                                     | Cardiovascular | 88 |
|       | LRP1                                            | Abdominal aortic aneurysm                                                                                  | Cardiovascular | 88 |
|       | DAB1                                            | Blood pressure, CVD RF and other traits                                                                    | Cardiovascular | 88 |
|       | DAB1                                            | Blood Pressure                                                                                             | Cardiovascular | 88 |
|       | DAB1                                            | Body Fat Distribution                                                                                      | Cardiovascular | 88 |
|       | DAB1                                            | Eosinophil counts                                                                                          | Cardiovascular | 88 |
|       | DAB1                                            | Chemotherapeutic response (cytarabine, 5' deoxyfluorouridine, carboplatin, cisplatin), in blood cell lines | Cardiovascular | 88 |
|       | DAB1                                            | Glycosylated haemoglobin levels                                                                            | Cardiovascular | 88 |
|       | LDLR                                            | Multiple traits (coronary heart disease, T2D, LDL cholesterol, HDL cholesterol)                            | Cardiovascular | 88 |
|       | LDLR                                            | Lipoprotein-associated phospholipase A2 activity and mass                                                  | Cardiovascular | 88 |
|       | DAB1                                            | Coronary Artery Disease                                                                                    | Cardiovascular | 88 |
|       | LDLR                                            | Coronary heart disease                                                                                     | Cardiovascular | 88 |
|       | LDLR                                            | Coronary Artery Disease                                                                                    | Cardiovascular | 88 |
|       | LDLR                                            | Lipid levels                                                                                               | Cardiovascular | 88 |
|       | LDLR                                            | Lipid traits                                                                                               | Cardiovascular | 88 |
|       | LDLR                                            | Triglycerides                                                                                              | Cardiovascular | 88 |
|       | SNX17                                           | Triglycerides                                                                                              | Cardiovascular | 88 |
|       | LDLR                                            | Cholesterol                                                                                                | Cardiovascular | 88 |
|       | LDLR                                            | Cholesterol, total                                                                                         | Cardiovascular | 88 |
| VLDLR | Cholesterol, total                              | Cardiovascular                                                                                             | 88             |    |
| LDLR  | Response to statin therapy                      | Cardiovascular                                                                                             | 88             |    |
| SNX17 | Response to statin therapy                      | Cardiovascular                                                                                             | 88             |    |
| JIP1  | Diabetes mellitus, noninsulin-dependent, 125853 | Endocrine                                                                                                  | 88             |    |
| APBA2 | Type 2 diabetes                                 | Endocrine                                                                                                  | 88             |    |

|       |                                                                                             |                                                                                 |             |    |
|-------|---------------------------------------------------------------------------------------------|---------------------------------------------------------------------------------|-------------|----|
| 81    | DAB1                                                                                        | Type 2 diabetes and other traits                                                | Endocrine   | 88 |
|       | DAB1                                                                                        | Type 2 diabetes                                                                 | Endocrine   | 88 |
|       | LDLR                                                                                        | Metabolite levels                                                               | Endocrine   | 88 |
|       | LDLR                                                                                        | Type 2 diabetes                                                                 | Endocrine   | 88 |
|       | LRP8                                                                                        | Type 2 diabetes                                                                 | Endocrine   | 88 |
|       | SNX17                                                                                       | Metabolite levels                                                               | Endocrine   | 88 |
|       | DAB1                                                                                        | Glycosylated haemoglobin levels                                                 | Endocrine   | 88 |
|       | LDLR                                                                                        | Hypercholesterolemia, familial, 143890                                          | Endocrine   | 88 |
| 82    | DAB1                                                                                        | Bipolar disorder and schizophrenia                                              | Psychiatric | 88 |
|       | LRP8                                                                                        | Bipolar disorder and schizophrenia                                              | Psychiatric | 88 |
|       | DAB1                                                                                        | Suicide attempts in bipolar disorder                                            | Psychiatric | 88 |
|       | DAB1                                                                                        | Major depressive disorder                                                       | Psychiatric | 88 |
|       | LDLR                                                                                        | Multiple traits (coronary heart disease, T2D, LDL cholesterol, HDL cholesterol) | Psychiatric | 88 |
|       | DAB1                                                                                        | Schizophrenia                                                                   | Psychiatric | 88 |
|       | LRP8                                                                                        | Schizophrenia                                                                   | Psychiatric | 88 |
|       | LDLR                                                                                        | Lipoprotein-associated phospholipase A2 activity and mass                       | Psychiatric | 88 |
|       | DAB1                                                                                        | Coronary Artery Disease                                                         | Psychiatric | 88 |
|       | LDLR                                                                                        | Coronary heart disease                                                          | Psychiatric | 88 |
|       | LDLR                                                                                        | Coronary Artery Disease                                                         | Psychiatric | 88 |
|       | DAB1                                                                                        | Alzheimer`s disease                                                             | Psychiatric | 88 |
|       | DAB1                                                                                        | Alzheimer`s disease (late onset)                                                | Psychiatric | 88 |
|       | DAB1                                                                                        | Bulimia nervosa                                                                 | Psychiatric | 88 |
|       | LRP1                                                                                        | Brain structure                                                                 | Psychiatric | 88 |
|       | DAB1                                                                                        | Amyotrophic Lateral Sclerosis                                                   | Psychiatric | 88 |
|       | LDLR                                                                                        | Triglycerides                                                                   | Psychiatric | 88 |
|       | SNX17                                                                                       | Triglycerides                                                                   | Psychiatric | 88 |
|       | LDLR                                                                                        | Cholesterol                                                                     | Psychiatric | 88 |
|       | LDLR                                                                                        | Cholesterol, total                                                              | Psychiatric | 88 |
|       | VLDLR                                                                                       | Cholesterol, total                                                              | Psychiatric | 88 |
|       | LDLR                                                                                        | Response to statin therapy                                                      | Psychiatric | 88 |
|       | SNX17                                                                                       | Response to statin therapy                                                      | Psychiatric | 88 |
|       | DAB1                                                                                        | Parkinson`s disease                                                             | Psychiatric | 88 |
|       | DAB1                                                                                        | Cognitive performance                                                           | Psychiatric | 88 |
|       | DAB1                                                                                        | Cognitive impairment induced by topiramate                                      | Psychiatric | 88 |
|       | APBA2                                                                                       | Temperament                                                                     | Psychiatric | 88 |
|       | DAB1                                                                                        | Neuroticism                                                                     | Psychiatric | 88 |
|       | DAB1                                                                                        | Intelligence                                                                    | Psychiatric | 88 |
|       | A4                                                                                          | Alzheimer disease-1, APP-related                                                | Psychiatric | 88 |
|       | APBA2                                                                                       | Alcohol consumption                                                             | Psychiatric | 88 |
|       | DAB1                                                                                        | Alcohol dependence                                                              | Psychiatric | 88 |
| LRP8  | Alcohol dependence                                                                          | Psychiatric                                                                     | 88          |    |
| A4    | Amyloidosis, cerebroarterial, Iowa type, 605714                                             | Neurological                                                                    | 88          |    |
| VLDLR | Cerebellar hypoplasia and mental retardation with or without quadrupedal locomotion, 224050 | Neurological                                                                    | 88          |    |
| DAB1  | Epilepsy (remission after treatment)                                                        | Neurological                                                                    | 88          |    |

|       |                                                                                                            |                                            |                        |                  |    |
|-------|------------------------------------------------------------------------------------------------------------|--------------------------------------------|------------------------|------------------|----|
| 83    | LRP1                                                                                                       | Migraine                                   | Neurological           | 88               |    |
|       | LRP1                                                                                                       | Migraine - clinic-based                    | Neurological           | 88               |    |
|       | LRP1                                                                                                       | Migraine without aura                      | Neurological           | 88               |    |
|       | LRP1                                                                                                       | Migraine with aura                         | Neurological           | 88               |    |
|       | VLDLR                                                                                                      | Epilepsy                                   | Neurological           | 88               |    |
|       | DAB1                                                                                                       | Parkinson`s disease                        | Neurological           | 88               |    |
|       | DAB1                                                                                                       | Cognitive performance                      | Neurological           | 88               |    |
|       | DAB1                                                                                                       | Cognitive impairment induced by topiramate | Neurological           | 88               |    |
|       | APBA2                                                                                                      | Response to mTOR inhibitor (rapamycin)     | Neurological           | 88               |    |
|       | DAB1                                                                                                       | Response to mTOR inhibitor (rapamycin)     | Neurological           | 88               |    |
|       | DAB1                                                                                                       | Taste perception                           | Neurological           | 88               |    |
|       | APBA2                                                                                                      | Temperament                                | Neurological           | 88               |    |
|       | DAB1                                                                                                       | Neuroticism                                | Neurological           | 88               |    |
|       | DAB1                                                                                                       | Intelligence                               | Neurological           | 88               |    |
|       | A4                                                                                                         | Alzheimer disease-1, APP-related           | Neurological           | 88               |    |
|       | A4                                                                                                         | Amyloidosis, cerebroarterial, Dutch type   | Neurological           | 88               |    |
|       | LRP8                                                                                                       | Body mass index (interaction)              | Neurological           | 88               |    |
|       | DAB1                                                                                                       | Hearing function                           | Neurological           | 88               |    |
|       | DAB1                                                                                                       | Schizophrenia                              | Neurological           | 88               |    |
|       | LRP8                                                                                                       | Schizophrenia                              | Neurological           | 88               |    |
|       | DAB1                                                                                                       | Alzheimer`s disease                        | Neurological           | 88               |    |
|       | DAB1                                                                                                       | Alzheimer`s disease (late onset)           | Neurological           | 88               |    |
|       | DAB1                                                                                                       | Bulimia nervosa                            | Neurological           | 88               |    |
|       | LRP1                                                                                                       | Brain structure                            | Neurological           | 88               |    |
|       | DAB1                                                                                                       | Amyotrophic Lateral Sclerosis              | Neurological           | 88               |    |
|       | LDLR                                                                                                       | Response to statin therapy                 | Neurological           | 88               |    |
|       | SNX17                                                                                                      | Response to statin therapy                 | Neurological           | 88               |    |
|       | 84                                                                                                         | SDC2                                       | Coronary heart disease | Gastrointestinal | 89 |
|       |                                                                                                            | LIN7A                                      | Celiac disease         | Gastrointestinal | 89 |
| LIN7C |                                                                                                            | Pancreatic cancer                          | Gastrointestinal       | 89               |    |
| 85    | APBA1                                                                                                      | Schizophrenia(age at onset)                | Neurological/Mental    | 89               |    |
|       | APBA1                                                                                                      | Alzheimer`s disease (late onset)           | Neurological/Mental    | 89               |    |
|       | SDC2                                                                                                       | Cognitive performance                      | Neurological/Mental    | 89               |    |
| CSKP  | Mental retardation and microcephaly with pontine and cerebellar hypoplasia, 300749 (3)                     | Neurological/Mental                        | 89                     |                  |    |
| ERBB4 | Chemotherapeutic response (cytarabine, 5` deoxyfluorouridine, carboplatin, cisplatin), in blood cell lines | Cardiovascular                             | 90                     |                  |    |
| ACTN2 | Cardiomyopathy, dilated, 1AA, 612158                                                                       | Cardiovascular                             | 90                     |                  |    |
| ADRB1 | Resting heart rate, 607276                                                                                 | Cardiovascular                             | 90                     |                  |    |
| ADRB1 | congestive heart failure, susceptibility to                                                                | Cardiovascular                             | 90                     |                  |    |
| IRK2  | Long QT syndrome-7, 170390                                                                                 | Cardiovascular                             | 90                     |                  |    |
| IRK2  | Short QT syndrome-3, 609622                                                                                | Cardiovascular                             | 90                     |                  |    |
| LDB3  | Cardiomyopathy, dilated, with left ventricular noncompaction                                               | Cardiovascular                             | 90                     |                  |    |
| DLG3  | Fibrinogen                                                                                                 | Cardiovascular                             | 90                     |                  |    |
| ERBB4 | Fibrinogen                                                                                                 | Cardiovascular                             | 90                     |                  |    |

|       |                   |                                                                           |                 |           |
|-------|-------------------|---------------------------------------------------------------------------|-----------------|-----------|
| 86    | ERBB4             | Response to statin treatment (atorvastatin), change in cholesterol levels | Cardiovascular  | 90        |
|       | ADRB1             | Birth weight                                                              | Cardiovascular  | 90        |
|       | DLG2              | stroke (ischemic)                                                         | Cardiovascular  | 90        |
|       | DLG2              | Myocardial Infarction                                                     | Cardiovascular  | 90        |
|       | DLG2              | Stroke                                                                    | Cardiovascular  | 90        |
|       | DLG2              | Heart Failure                                                             | Cardiovascular  | 90        |
|       | ERBB4             | Left ventricular hypertrophy                                              | Cardiovascular  | 90        |
|       | NLGN1             | Cardiovascular disease                                                    | Cardiovascular  | 90        |
|       | NLGN1             | Myocardial Infarction                                                     | Cardiovascular  | 90        |
|       | DLG1              | Blood pressure, CVD RF and other traits                                   | Cardiovascular  | 90        |
|       | DLG2              | Blood pressure, CVD RF and other traits                                   | Cardiovascular  | 90        |
|       | GRIK2             | Blood Pressure                                                            | Cardiovascular  | 90        |
|       | GRIK2             | Blood pressure, CVD RF and other traits                                   | Cardiovascular  | 90        |
|       | NLGN1             | Blood pressure, CVD RF and other traits                                   | Cardiovascular  | 90        |
|       | NLGN1             | Blood pressure (response to angiotensin II receptor blocker)              | Cardiovascular  | 90        |
|       | NLGN1             | Thiazide-induced adverse metabolic effects in hypertensive patients       | Cardiovascular  | 90        |
|       | LDB3              | Cardiomyopathy, dilated                                                   | Cardiovascular  | 90        |
|       | DLG2              | Glucose levels                                                            | Cardiovascular  | 90        |
|       | ERBB4             | Tuberculosis                                                              | Cardiovascular  | 90        |
|       | GRIK2             | Ankle-brachial index                                                      | Cardiovascular  | 90        |
|       | ERBB4             | Pericardial fat                                                           | Cardiovascular  | 90        |
|       | ERBB4             | Serum dimethylarginine levels (symmetric)                                 | Cardiovascular  | 90        |
|       | DLG2              | Phospholipid levels (plasma)                                              | Cardiovascular  | 90        |
|       | DLG2              | Coronary heart disease                                                    | Cardiovascular  | 90        |
|       | DLG2              | HDL cholesterol                                                           | Cardiovascular  | 90        |
|       | ERBB4             | HDL cholesterol                                                           | Cardiovascular  | 90        |
|       | IL16              | Coronary heart disease                                                    | Cardiovascular  | 90        |
|       | DLG4              | Adiponectin levels                                                        | Cardiovascular  | 90        |
|       | GRIK2             | Triglycerides                                                             | Cardiovascular  | 90        |
|       | GRIK2             | Polyunsaturated fatty acid levels, in plasma                              | Cardiovascular  | 90        |
|       | GRIK2             | Prion diseases                                                            | Cardiovascular  | 90        |
|       | IL16              | Lymphocyte counts                                                         | Cardiovascular  | 90        |
|       | 87                | ACTN2                                                                     | Type 2 diabetes | Endocrine |
| CDK5  |                   | Insulin resistance                                                        | Endocrine       | 90        |
| DLG2  |                   | Type 2 diabetes                                                           | Endocrine       | 90        |
| DLG2  |                   | Type 2 diabetes and 6 quantitative traits                                 | Endocrine       | 90        |
| DLG4  |                   | Metabolite levels                                                         | Endocrine       | 90        |
| ERBB4 |                   | Type 2 diabetes                                                           | Endocrine       | 90        |
| ERBB4 |                   | Type 1 diabetes nephropathy                                               | Endocrine       | 90        |
| GRIK2 |                   | Type 2 diabetes                                                           | Endocrine       | 90        |
| GRIK2 |                   | Insulin resistance                                                        | Endocrine       | 90        |
| GRIK2 |                   | Type 1 diabetes                                                           | Endocrine       | 90        |
| NLGN1 |                   | Type 2 diabetes                                                           | Endocrine       | 90        |
| NLGN1 | Metabolite levels | Endocrine                                                                 | 90              |           |

|    |       |                                                                                                            |                  |    |
|----|-------|------------------------------------------------------------------------------------------------------------|------------------|----|
|    | DLG2  | Glucose levels                                                                                             | Endocrine        | 90 |
|    | DLG2  | Urinary albumin excretion                                                                                  | Endocrine        | 90 |
|    | MAP1A | Tumor biomarkers                                                                                           | Endocrine        | 90 |
|    | ADRB1 | Birth weight                                                                                               | Endocrine        | 90 |
|    | DLG2  | Kidney function and endocrine traits                                                                       | Endocrine        | 90 |
|    | DLG4  | Adiponectin levels                                                                                         | Endocrine        | 90 |
|    | GRIK2 | Diabetic nephropathy                                                                                       | Endocrine        | 90 |
|    | GRIK2 | Polyunsaturated fatty acid levels, in plasma                                                               | Endocrine        | 90 |
| 88 | DVL3  | Major depressive disorder                                                                                  | Psychiatric      | 91 |
|    | SMAD3 | Coronary Artery Disease                                                                                    | Psychiatric      | 91 |
|    | SMAD3 | Coronary heart disease                                                                                     | Psychiatric      | 91 |
|    | SMAD3 | Alzheimer's disease (late onset)                                                                           | Psychiatric      | 91 |
|    | SMAD7 | Tourette syndrome                                                                                          | Psychiatric      | 91 |
| 89 | SMAD1 | Duodenal ulcer                                                                                             | Gastrointestinal | 91 |
|    | SMAD3 | Coronary Artery Disease                                                                                    | Gastrointestinal | 91 |
|    | SMAD3 | Crohn's disease                                                                                            | Gastrointestinal | 91 |
|    | SMAD3 | Inflammatory bowel disease                                                                                 | Gastrointestinal | 91 |
|    | SMAD3 | Coronary heart disease                                                                                     | Gastrointestinal | 91 |
|    | SMAD4 | Juvenile polyposis/hereditary hemorrhagic telangiectasia syndrome, 175050                                  | Gastrointestinal | 91 |
|    | SMAD4 | Pancreatic cancer                                                                                          | Gastrointestinal | 91 |
|    | SMAD4 | Polyposis, juvenile intestinal, 174900                                                                     | Gastrointestinal | 91 |
|    | SMAD6 | Chemotherapeutic response (cytarabine, 5' deoxyfluorouridine, carboplatin, cisplatin), in blood cell lines | Gastrointestinal | 91 |
| 90 | SMAD7 | Colorectal cancer, susceptibility to, 3, 612229                                                            | Cancer           | 91 |
|    | SMAD3 | Cisplatin and carboplatin cytotoxicity, in blood cell lines                                                | Cancer           | 91 |
|    | SMAD6 | Prostate cancer                                                                                            | Cancer           | 91 |
|    | SMAD7 | Colorectal cancer                                                                                          | Cancer           | 91 |
|    | SMAD7 | Cisplatin and carboplatin cytotoxicity, in blood cell lines                                                | Cancer           | 91 |
|    | SMAD3 | Response to taxane treatment (paclitaxel)                                                                  | Cancer           | 91 |
|    | SMAD7 | Nasopharyngeal carcinoma                                                                                   | Cancer           | 91 |
|    | SMAD6 | Chemotherapeutic response (cytarabine, 5' deoxyfluorouridine, carboplatin, cisplatin), in blood cell lines | Cancer           | 91 |
|    | SMAD4 | Juvenile polyposis/hereditary hemorrhagic telangiectasia syndrome, 175050                                  | Cancer           | 91 |
|    | SMAD4 | Polyposis, juvenile intestinal, 174900                                                                     | Cancer           | 91 |
|    | SMAD4 | Pancreatic cancer                                                                                          | Cancer           | 91 |
| 91 | KLF6  | Prostate cancer, somatic, 176807                                                                           | Cancer           | 92 |
|    | E2F1  | Melanoma                                                                                                   | Cancer           | 92 |
|    | NFYC  | Cervical cancer                                                                                            | Cancer           | 92 |
|    | TFDP1 | Esophageal cancer (squamous cell)                                                                          | Cancer           | 92 |
|    | TFDP2 | Lung cancer                                                                                                | Cancer           | 92 |
|    | KLF6  | Gastric cancer, somatic, 137215                                                                            | Cancer           | 92 |
|    | CREB1 | Histiocytoma, angiomatoid fibrous, somatic, 612160                                                         | Cancer           | 94 |
|    | CBP   | Rubenstein-Taybi syndrome, 180849                                                                          | Cancer           | 94 |
|    | EP300 | Colorectal cancer, 114500                                                                                  | Cancer           | 94 |
|    | EP300 | Rubenstein-Taybi syndrome, 180849                                                                          | Cancer           | 94 |

|       |            |                                                                   |               |    |
|-------|------------|-------------------------------------------------------------------|---------------|----|
| 92    | GATA1      | Leukemia, megakaryoblastic, of Down syndrome, 190685              | Cancer        | 94 |
|       | GATA1      | Leukemia, megakaryoblastic, with or without Down syndrome, 190685 | Cancer        | 94 |
|       | VHL        | Hemangioblastoma, cerebellar, somatic                             | Cancer        | 94 |
|       | VHL        | Pheochromocytoma, 171300                                          | Cancer        | 94 |
|       | VHL        | Renal cell carcinoma, somatic, 144700                             | Cancer        | 94 |
|       | VHL        | von Hippel-Lindau syndrome, 193300                                | Cancer        | 94 |
|       | HDAC4      | Response to gemcitabine or arabinosylcytosin in blood cell lines  | Cancer        | 94 |
|       | NCOA3      | Response to treatment for acute lymphoblastic leukemia            | Cancer        | 94 |
|       | HDAC4      | Methotrexate clearance (acute lymphoblastic leukemia)             | Cancer        | 94 |
|       | HDAC4      | Melanoma                                                          | Cancer        | 94 |
|       | HDAC4      | Cisplatin and carboplatin cytotoxicity, in blood cell lines       | Cancer        | 94 |
| 93    | EP300      | Hemoglobin                                                        | Hematological | 94 |
|       | HDAC4      | Hemoglobin concentration                                          | Hematological | 94 |
|       | EP300      | Self-reported allergy                                             | Hematological | 94 |
|       | HIF1A      | Blood Pressure                                                    | Hematological | 94 |
|       | HDAC4      | Blood pressure, CVD RF and other traits                           | Hematological | 94 |
|       | GATA1      | Dyserythropoietic anemia with thrombocytopenia, 300367            | Hematological | 94 |
|       | GATA1      | Macrothrombocytopenia, 300367                                     | Hematological | 94 |
|       | VHL        | Polycythemia, benign familial, 263400                             | Hematological | 94 |
| HDAC4 | IgE levels | Hematological                                                     | 94            |    |
| 94    | ANDR       | Androgen insensitivity, 300068                                    | Endocrine     | 96 |
|       | ANDR       | Hypospadias, perineal, 300633                                     | Endocrine     | 96 |
|       | ESR1       | Estrogen resistance                                               | Endocrine     | 96 |
|       | ESR1       | Type 2 diabetes                                                   | Endocrine     | 96 |
|       | NCOA2      | Type 2 diabetes                                                   | Endocrine     | 96 |
|       | NCOA2      | Metabolite levels (MHPG)                                          | Endocrine     | 96 |
| 95    | ANDR       | Prostate cancer                                                   | Cancer        | 96 |
|       | ANDR       | Prostate cancer, susceptibility to, 176807                        | Cancer        | 96 |
|       | ESR1       | Breast cancer                                                     | Cancer        | 96 |
|       | ESR1       | Response to taxane treatment (paclitaxel)                         | Cancer        | 96 |
|       | NCOA2      | Non-small cell lung cancer                                        | Cancer        | 96 |
|       | ANDR       | Breast cancer, male, with Reifenstein syndrome                    | Cancer        | 96 |
| 96    | CTBP2      | Personality dimensions                                            | Psychiatric   | 97 |
|       | CTBP2      | Alzheimer`s disease                                               | Psychiatric   | 97 |
|       | CTBP2      | Alcohol and nictotine co-dependence                               | Psychiatric   | 97 |
|       | CTBP2      | Alcohol dependence                                                | Psychiatric   | 97 |
|       | CTBP2      | Depression (quantitative trait)                                   | Psychiatric   | 97 |
|       | CTBP2      | White matter integrity                                            | Psychiatric   | 97 |
|       | EZH1       | Personality dimensions                                            | Psychiatric   | 97 |
|       | EZH2       | Alzheimer`s disease                                               | Psychiatric   | 97 |
|       | RBBP4      | Coronary heart disease                                            | Psychiatric   | 97 |
|       | EED        | Cholesterol                                                       | Psychiatric   | 97 |
|       | GRB14      | Major depressive disorder (broad)                                 | Psychiatric   | 98 |
|       | FGF1       | Nicotine smoking                                                  | Psychiatric   | 98 |

|       |                         |                                                       |             |     |
|-------|-------------------------|-------------------------------------------------------|-------------|-----|
| 97    | GRB14                   | Nicotine smoking                                      | Psychiatric | 98  |
|       | FGFR1                   | Coronary heart disease                                | Psychiatric | 98  |
|       | FGFR2                   | ldl cholesterol                                       | Psychiatric | 98  |
|       | FGF1                    | Amyotrophic Lateral Sclerosis                         | Psychiatric | 98  |
|       | FRS2                    | Amyotrophic Lateral Sclerosis                         | Psychiatric | 98  |
|       | FRS2                    | Personality dimensions                                | Psychiatric | 98  |
| 98    | FGFR2                   | Craniosynostosis, nonspecific                         | Bone        | 98  |
|       | FGFR2                   | Jackson-Weiss syndrome, 123150                        | Bone        | 98  |
|       | FGFR1                   | Jackson-Weiss syndrome, 123150                        | Bone        | 98  |
|       | FGFR2                   | Gout                                                  | Bone        | 98  |
|       | FGF2                    | Body mass index                                       | Bone        | 98  |
|       | FGF1                    | Rheumatoid arthritis                                  | Bone        | 98  |
|       | FGFR2                   | Beare-Stevenson cutis gyrata syndrome, 123790         | Bone        | 98  |
|       | FGFR2                   | Craniofacial-skeletal-dermatologic dysplasia          | Bone        | 98  |
|       | FGFR2                   | Saethre-Chotzen syndrome, 101400                      | Bone        | 98  |
|       | FGFR2                   | Apert syndrome, 101200                                | Bone        | 98  |
|       | FGFR2                   | Crouzon syndrome, 123500                              | Bone        | 98  |
|       | FGFR1                   | Pfeiffer syndrome, 101600                             | Bone        | 98  |
|       | FGFR2                   | Pfeiffer syndrome, 101600                             | Bone        | 98  |
| 99    | IGF1R                   | Response to taxane treatment (placlitaxel)            | Cancer      | 101 |
|       | ARHGC                   | Leukemia, acute myeloid, 601626                       | Cancer      | 101 |
|       | GRB10                   | Acute lymphoblastic leukemia (childhood)              | Cancer      | 101 |
|       | IGF1R                   | Acute lymphoblastic leukemia (childhood)              | Cancer      | 101 |
|       | GRIA3                   | Bipolar disorder (mania)                              | Psychiatric | 102 |
|       | GRM3                    | Bipolar disorder                                      | Psychiatric | 102 |
|       | GRM7                    | Bipolar disorder, schizoaffective                     | Psychiatric | 102 |
|       | SDC2                    | Bipolar disorder and schizophrenia                    | Psychiatric | 102 |
|       | GRIA1                   | Depression (quantitative trait)                       | Psychiatric | 102 |
|       | GRIA3                   | Suicidal ideation with citalopram treatment           | Psychiatric | 102 |
|       | GRIK1                   | Suicide attempts in bipolar disorder                  | Psychiatric | 102 |
|       | GRM7                    | Panic disorder                                        | Psychiatric | 102 |
|       | GRM7                    | Major depressive disorder (broad)                     | Psychiatric | 102 |
|       | GRM7                    | Major depressive disorder                             | Psychiatric | 102 |
|       | GRM7                    | Suicide attempts in bipolar disorder                  | Psychiatric | 102 |
|       | SDC2                    | Response to lithium treatment in bipolar disorder     | Psychiatric | 102 |
|       | GRIP1                   | Suicidal ideation                                     | Psychiatric | 102 |
|       | GRM7                    | Tourette syndrome                                     | Psychiatric | 102 |
|       | GRIK1                   | Schizophrenia (cytomegalovirus infection interaction) | Psychiatric | 102 |
|       | GRM7                    | Schizophrenia                                         | Psychiatric | 102 |
|       | GRIA3                   | Nicotine dependence                                   | Psychiatric | 102 |
|       | GRM7                    | Nicotine smoking                                      | Psychiatric | 102 |
|       | GRIA1                   | Sudden cardiac arrest                                 | Psychiatric | 102 |
|       | GRIP1                   | Platelet counts                                       | Psychiatric | 102 |
| GRIA1 | Coronary Artery Disease | Psychiatric                                           | 102         |     |

|       |                     |                                                                                                                                               |              |     |
|-------|---------------------|-----------------------------------------------------------------------------------------------------------------------------------------------|--------------|-----|
| 100   | GRM7                | Coronary heart disease                                                                                                                        | Psychiatric  | 102 |
|       | SDC2                | Coronary heart disease                                                                                                                        | Psychiatric  | 102 |
|       | GRIA1               | Alzheimer`s disease                                                                                                                           | Psychiatric  | 102 |
|       | GRIA4               | Alzheimer`s disease (late onset)                                                                                                              | Psychiatric  | 102 |
|       | GRM7                | Alzheimer`s disease                                                                                                                           | Psychiatric  | 102 |
|       | GRIP1               | Alzheimer`s disease                                                                                                                           | Psychiatric  | 102 |
|       | GRIA3               | Amyotrophic Lateral Sclerosis                                                                                                                 | Psychiatric  | 102 |
|       | GRM3                | Amyotrophic Lateral Sclerosis                                                                                                                 | Psychiatric  | 102 |
|       | GRM7                | Amyotrophic Lateral Sclerosis                                                                                                                 | Psychiatric  | 102 |
|       | GRIP1               | Amyotrophic Lateral Sclerosis                                                                                                                 | Psychiatric  | 102 |
|       | GRIK1               | Autism spectrum disorder, attention deficit-hyperactivity disorder, bipolar disorder, major depressive disorder, and schizophrenia (combined) | Psychiatric  | 102 |
|       | GRIA3               | Mental retardation, X-linked 94, 300699                                                                                                       | Psychiatric  | 102 |
|       | GRIA3               | Parkinson`s disease                                                                                                                           | Psychiatric  | 102 |
|       | GRIA4               | Parkinson`s disease                                                                                                                           | Psychiatric  | 102 |
|       | GRM7                | Parkinson`s disease                                                                                                                           | Psychiatric  | 102 |
|       | NSF                 | Parkinson`s disease                                                                                                                           | Psychiatric  | 102 |
|       | GRIA1               | Cognitive impairment induced by topiramate                                                                                                    | Psychiatric  | 102 |
|       | GRIA1               | Cognitive decline                                                                                                                             | Psychiatric  | 102 |
|       | GRIA2               | Cognitive impairment induced by topiramate                                                                                                    | Psychiatric  | 102 |
|       | GRIA4               | Cognitive impairment induced by topiramate                                                                                                    | Psychiatric  | 102 |
|       | GRM7                | Personality dimensions                                                                                                                        | Psychiatric  | 102 |
|       | GRM7                | Cognitive impairment induced by topiramate                                                                                                    | Psychiatric  | 102 |
|       | GRM7                | Cognitive performance                                                                                                                         | Psychiatric  | 102 |
|       | SDC2                | Cognitive performance                                                                                                                         | Psychiatric  | 102 |
|       | GRIP1               | Cognitive impairment induced by topiramate                                                                                                    | Psychiatric  | 102 |
|       | GRM3                | Intelligence                                                                                                                                  | Psychiatric  | 102 |
|       | SC6A3               | Major affective disorder, 125480                                                                                                              | Psychiatric  | 102 |
|       | SC6A3               | Nicotine dependence, protection against, 188890                                                                                               | Psychiatric  | 102 |
|       | GRIA1               | Alcohol dependence                                                                                                                            | Psychiatric  | 102 |
|       | GRIA1               | Alcoholism (heaviness of drinking)                                                                                                            | Psychiatric  | 102 |
|       | GRIA4               | Alcohol dependence                                                                                                                            | Psychiatric  | 102 |
|       | GRM3                | Alcohol and nictotine co-dependence                                                                                                           | Psychiatric  | 102 |
|       | GRM3                | Alcohol dependence                                                                                                                            | Psychiatric  | 102 |
|       | GRM7                | Alcohol dependence                                                                                                                            | Psychiatric  | 102 |
|       | GRIP1               | Substance dependence                                                                                                                          | Psychiatric  | 102 |
|       | GRIA4               | Epilepsy                                                                                                                                      | Neurological | 102 |
|       | GRIK1               | Epilepsy                                                                                                                                      | Neurological | 102 |
|       | GRIK1               | Multiple sclerosis                                                                                                                            | Neurological | 102 |
|       | GRM7                | Migraine                                                                                                                                      | Neurological | 102 |
|       | GRM7                | Brain size                                                                                                                                    | Neurological | 102 |
|       | GRM7                | Multiple sclerosis                                                                                                                            | Neurological | 102 |
| GRIA3 | Parkinson`s disease | Neurological                                                                                                                                  | 102          |     |
| GRIA4 | Parkinson`s disease | Neurological                                                                                                                                  | 102          |     |
| GRM7  | Parkinson`s disease | Neurological                                                                                                                                  | 102          |     |

|       |       |                                                                                                                                               |                                                                  |        |     |
|-------|-------|-----------------------------------------------------------------------------------------------------------------------------------------------|------------------------------------------------------------------|--------|-----|
| 101   | NSF   | Parkinson`s disease                                                                                                                           | Neurological                                                     | 102    |     |
|       | GRIA1 | Cognitive impairment induced by topiramate                                                                                                    | Neurological                                                     | 102    |     |
|       | GRIA1 | Cognitive decline                                                                                                                             | Neurological                                                     | 102    |     |
|       | GRIA2 | Cognitive impairment induced by topiramate                                                                                                    | Neurological                                                     | 102    |     |
|       | GRIA4 | Cognitive impairment induced by topiramate                                                                                                    | Neurological                                                     | 102    |     |
|       | GRM7  | Personality dimensions                                                                                                                        | Neurological                                                     | 102    |     |
|       | GRM7  | Cognitive impairment induced by topiramate                                                                                                    | Neurological                                                     | 102    |     |
|       | GRM7  | Cognitive performance                                                                                                                         | Neurological                                                     | 102    |     |
|       | SDC2  | Cognitive performance                                                                                                                         | Neurological                                                     | 102    |     |
|       | GRIP1 | Cognitive impairment induced by topiramate                                                                                                    | Neurological                                                     | 102    |     |
|       | GRM3  | Intelligence                                                                                                                                  | Neurological                                                     | 102    |     |
|       | GRIK1 | Body mass index                                                                                                                               | Neurological                                                     | 102    |     |
|       | GRM7  | Body mass index                                                                                                                               | Neurological                                                     | 102    |     |
|       | GRIK1 | Mathematical ability                                                                                                                          | Neurological                                                     | 102    |     |
|       | GRIK1 | Schizophrenia (cytomegalovirus infection interaction)                                                                                         | Neurological                                                     | 102    |     |
|       | GRM7  | Schizophrenia                                                                                                                                 | Neurological                                                     | 102    |     |
|       | GRIA1 | Alzheimer`s disease                                                                                                                           | Neurological                                                     | 102    |     |
|       | GRIA4 | Alzheimer`s disease (late onset)                                                                                                              | Neurological                                                     | 102    |     |
|       | GRM7  | Alzheimer`s disease                                                                                                                           | Neurological                                                     | 102    |     |
|       | GRIP1 | Alzheimer`s disease                                                                                                                           | Neurological                                                     | 102    |     |
|       | GRIA3 | Amyotrophic Lateral Sclerosis                                                                                                                 | Neurological                                                     | 102    |     |
|       | GRM3  | Amyotrophic Lateral Sclerosis                                                                                                                 | Neurological                                                     | 102    |     |
|       | GRM7  | Amyotrophic Lateral Sclerosis                                                                                                                 | Neurological                                                     | 102    |     |
|       | GRIP1 | Amyotrophic Lateral Sclerosis                                                                                                                 | Neurological                                                     | 102    |     |
|       | GRIK1 | Autism spectrum disorder, attention deficit-hyperactivity disorder, bipolar disorder, major depressive disorder, and schizophrenia (combined) | Neurological                                                     | 102    |     |
|       | GRIA4 | Response to statin therapy                                                                                                                    | Neurological                                                     | 102    |     |
|       | GRM3  | Response to statin therapy                                                                                                                    | Neurological                                                     | 102    |     |
|       | GRIA3 | Mental retardation, X-linked 94, 300699                                                                                                       | Neurological                                                     | 102    |     |
|       | 102   | GRIK1                                                                                                                                         | Response to gemcitabine or arabinosylcytosin in blood cell lines | Cancer | 102 |
|       |       | GRIA1                                                                                                                                         | Asparaginase hypersensitivity in acute lymphoblastic leukemia    | Cancer | 102 |
|       |       | GRIK1                                                                                                                                         | Breast cancer                                                    | Cancer | 102 |
| GRIK1 |       | Paclitaxel sensitivity in NCI60 cancer cell lines                                                                                             | Cancer                                                           | 102    |     |
| GRM7  |       | Prostate cancer                                                                                                                               | Cancer                                                           | 102    |     |
| GRM7  |       | Breast cancer                                                                                                                                 | Cancer                                                           | 102    |     |
| GRM7  |       | Melanoma                                                                                                                                      | Cancer                                                           | 102    |     |
| GRM7  |       | Cisplatin and carboplatin cytotoxicity, in blood cell lines                                                                                   | Cancer                                                           | 102    |     |
| NSF   |       | Prostate cancer                                                                                                                               | Cancer                                                           | 102    |     |
| NSF   |       | Ovarian cancer in BRCA1 mutation carriers                                                                                                     | Cancer                                                           | 102    |     |
| GRIK1 |       | Leukocyte Counts                                                                                                                              | Cancer                                                           | 102    |     |
| GRIA3 |       | Response to taxane treatment (paclitaxel)                                                                                                     | Cancer                                                           | 102    |     |
| GRIA4 |       | Response to taxane treatment (paclitaxel)                                                                                                     | Cancer                                                           | 102    |     |
| GRIK1 |       | Nasopharyngeal carcinoma                                                                                                                      | Cancer                                                           | 102    |     |
| GRM7  |       | Response to taxane treatment (paclitaxel)                                                                                                     | Cancer                                                           | 102    |     |
| GRIK1 |       | Hepatocellular carcinoma                                                                                                                      | Cancer                                                           | 102    |     |

|     |       |                                                                                             |                |     |
|-----|-------|---------------------------------------------------------------------------------------------|----------------|-----|
|     | GRIA4 | Lymphocyte counts                                                                           | Cancer         | 102 |
|     | GRIA4 | Matrix metalloproteinase levels                                                             | Cardiovascular | 102 |
|     | GRM3  | Response to statin treatment (atorvastatin), change in cholesterol levels                   | Cardiovascular | 102 |
|     | GRM7  | Aortic root size                                                                            | Cardiovascular | 102 |
|     | GRIP1 | Birth weight                                                                                | Cardiovascular | 102 |
|     | GRIA1 | Stroke                                                                                      | Cardiovascular | 102 |
|     | GRIK1 | Cardiovascular disease adverse events in renal patients treated with calcineurin inhibitors | Cardiovascular | 102 |
|     | SDC2  | Stroke                                                                                      | Cardiovascular | 102 |
|     | SDC2  | Lipoproteins                                                                                | Cardiovascular | 102 |
|     | GRIP1 | Myocardial Infarction                                                                       | Cardiovascular | 102 |
|     | GRM7  | Blood pressure, CVD RF and other traits                                                     | Cardiovascular | 102 |
|     | SDC2  | Blood pressure, CVD RF and other traits                                                     | Cardiovascular | 102 |
|     | GRIP1 | Blood pressure, CVD RF and other traits                                                     | Cardiovascular | 102 |
|     | GRIK1 | Leukocyte Counts                                                                            | Cardiovascular | 102 |
|     | GRIA4 | Glycosylated haemoglobin levels                                                             | Cardiovascular | 102 |
|     | GRIA4 | Serum albumin level                                                                         | Cardiovascular | 102 |
|     | GRIA1 | Sudden cardiac arrest                                                                       | Cardiovascular | 102 |
|     | GRIP1 | Platelet counts                                                                             | Cardiovascular | 102 |
|     | GRIA1 | Coronary Artery Disease                                                                     | Cardiovascular | 102 |
| 103 | GRM7  | Coronary heart disease                                                                      | Cardiovascular | 102 |
|     | SDC2  | Coronary heart disease                                                                      | Cardiovascular | 102 |
|     | GRIA4 | Response to statin therapy                                                                  | Cardiovascular | 102 |
|     | GRM3  | Response to statin therapy                                                                  | Cardiovascular | 102 |
|     | GRIA4 | Lymphocyte counts                                                                           | Cardiovascular | 102 |
| 104 | GNA12 | Breast cancer and prostate cancer                                                           | Cancer         | 103 |
|     | SIM1  | Pancreatic cancer                                                                           | Cancer         | 103 |
|     | SIM1  | Oral cancers (chewing tobacco related)                                                      | Cancer         | 103 |
|     | GNA12 | Lymphocyte counts                                                                           | Cancer         | 103 |
|     | ARNT  | Leukemia, acute myeloblastic                                                                | Cancer         | 103 |
|     | AIP   | Pituitary adenoma, ACTH-secreting, 219090                                                   | Cancer         | 103 |
|     | AIP   | Pituitary adenoma, growth hormone-secreting, 102200                                         | Cancer         | 103 |
|     | AIP   | Pituitary adenoma, prolactin-secreting, 600634                                              | Cancer         | 103 |
| 105 | CDC37 | Soluble ICAM-1                                                                              | Psychiatric    | 103 |
|     | FKBP4 | Suicide attempts in bipolar disorder                                                        | Psychiatric    | 103 |
|     | SIM2  | Suicide attempts in bipolar disorder                                                        | Psychiatric    | 103 |
|     | GNA12 | Alzheimer`s disease (late onset)                                                            | Psychiatric    | 103 |
|     | SIM2  | Brain structure                                                                             | Psychiatric    | 103 |
|     | GNA12 | Parkinson`s disease                                                                         | Psychiatric    | 103 |
|     | CDC37 | Parkinson`s disease (familial)                                                              | Psychiatric    | 103 |
| 106 | ANXA6 | Systemic lupus erythematosus                                                                | Immunological  | 106 |
|     | RASA1 | HIV-1 control                                                                               | Immunological  | 106 |
|     | ANXA6 | Taste perception                                                                            | Immunological  | 106 |
|     | ANXA6 | Lymphocyte counts                                                                           | Immunological  | 106 |
|     | RGL1  | Lymphocyte counts                                                                           | Immunological  | 106 |

|     |                                                                            |                                                                                                            |                |     |
|-----|----------------------------------------------------------------------------|------------------------------------------------------------------------------------------------------------|----------------|-----|
|     | RASK                                                                       | Leukemia, acute myelogenous                                                                                | Immunological  | 106 |
| 107 | SHOC2                                                                      | Urinary metabolites                                                                                        | Renal          | 106 |
|     | RGL1                                                                       | Urinary metabolites                                                                                        | Renal          | 106 |
|     | RASK                                                                       | Noonan syndrome 3, 609942                                                                                  | Renal          | 106 |
|     | RASH                                                                       | Bladder cancer, somatic, 109800                                                                            | Renal          | 106 |
|     | RASK                                                                       | Bladder cancer, 109800                                                                                     | Renal          | 106 |
| 108 | RASA1                                                                      | Capillary malformation-arteriovenous malformation, 608354                                                  | Cardiovascular | 106 |
|     | RASA1                                                                      | Parkes Weber syndrome, 608355                                                                              | Cardiovascular | 106 |
|     | ANXA6                                                                      | Lymphocyte counts                                                                                          | Cardiovascular | 106 |
|     | RGL1                                                                       | Lymphocyte counts                                                                                          | Cardiovascular | 106 |
|     | RASK                                                                       | Noonan syndrome 3, 609942                                                                                  | Cardiovascular | 106 |
| 109 | RASK                                                                       | Noonan syndrome 3, 609942                                                                                  | Dermatological | 106 |
|     | RASH                                                                       | Costello syndrome, 218040                                                                                  | Dermatological | 106 |
|     | RASK                                                                       | Costello syndrome, 218040                                                                                  | Dermatological | 106 |
|     | RASA1                                                                      | Parkes Weber syndrome, 608355                                                                              | Dermatological | 106 |
|     | ANXA6                                                                      | Systemic lupus erythematosus                                                                               | Dermatological | 106 |
| 110 | EGFR                                                                       | Bipolar disorder                                                                                           | Psychiatric    | 110 |
|     | JAK2                                                                       | Depression (quantitative trait)                                                                            | Psychiatric    | 110 |
|     | INSR                                                                       | Schizophrenia                                                                                              | Psychiatric    | 110 |
|     | IRS1                                                                       | Sudden cardiac arrest                                                                                      | Psychiatric    | 110 |
|     | SHC1                                                                       | White blood cell count                                                                                     | Psychiatric    | 110 |
|     | EGFR                                                                       | HDL cholesterol                                                                                            | Psychiatric    | 110 |
|     | PDE4A                                                                      | Coronary heart disease                                                                                     | Psychiatric    | 110 |
|     | EGF                                                                        | Alzheimer`s disease                                                                                        | Psychiatric    | 110 |
|     | EGFR                                                                       | Alzheimer`s disease (late onset)                                                                           | Psychiatric    | 110 |
|     | EGFR                                                                       | Alzheimer`s disease                                                                                        | Psychiatric    | 110 |
|     | GHR                                                                        | Alzheimer`s disease                                                                                        | Psychiatric    | 110 |
|     | JAK2                                                                       | Alzheimer`s disease (late onset)                                                                           | Psychiatric    | 110 |
|     | INSR                                                                       | Amyotrophic Lateral Sclerosis                                                                              | Psychiatric    | 110 |
|     | EGF                                                                        | Menopause (age at onset)                                                                                   | Psychiatric    | 110 |
|     | EGFR                                                                       | Alcoholism (heaviness of drinking)                                                                         | Psychiatric    | 110 |
|     | INSR                                                                       | Alcohol dependence                                                                                         | Psychiatric    | 110 |
|     | PDE4A                                                                      | Soluble ICAM-1                                                                                             | Psychiatric    | 110 |
|     | GHR                                                                        | Information processing speed                                                                               | Psychiatric    | 110 |
|     | SH2B2                                                                      | Information processing speed                                                                               | Psychiatric    | 110 |
|     | SH2B1                                                                      | Smoking behavior                                                                                           | Psychiatric    | 110 |
|     | PTN12                                                                      | Colon cancer                                                                                               | Cancer         | 110 |
|     | STA5B                                                                      | Leukemia, acute promyelocytic, STAT5B/RARA type                                                            | Cancer         | 110 |
|     | EGFR                                                                       | Prostate cancer                                                                                            | Cancer         | 110 |
|     | EGFR                                                                       | Cervical cancer                                                                                            | Cancer         | 110 |
|     | LYN                                                                        | Prostate cancer                                                                                            | Cancer         | 110 |
|     | JAK2                                                                       | Myeloproliferative neoplasms                                                                               | Cancer         | 110 |
|     | EGFR                                                                       | Chemotherapeutic response (cytarabine, 5` deoxyfluorouridine, carboplatin, cisplatin), in blood cell lines | Cancer         | 110 |
| LYN | Chemotherapeutic response (cytarabine, 5` deoxyfluorouridine, carboplatin, | Cancer                                                                                                     | 110            |     |

|      |                   |                                                                                                            |                |     |
|------|-------------------|------------------------------------------------------------------------------------------------------------|----------------|-----|
| 111  |                   | cisplatin), in blood cell lines                                                                            |                |     |
|      | JAK2              | Leukemia, acute myelogenous, 601626                                                                        | Cancer         | 110 |
|      | JAK2              | Polycythemia vera, 263300                                                                                  | Cancer         | 110 |
|      | JAK2              | Thrombocythemia, essential, 187950                                                                         | Cancer         | 110 |
|      | JAK2              | Myelofibrosis, idiopathic, 254450                                                                          | Cancer         | 110 |
|      | JAK2              | Myeloproliferative disorder with erythrocytosis                                                            | Cancer         | 110 |
|      | EGFR              | Adenocarcinoma of lung, response to tyrosine kinase inhibitor in, 211980                                   | Cancer         | 110 |
|      | EGFR              | Nonsmall cell lung cancer, response to tyrosine kinase inhibitor in, 211980                                | Cancer         | 110 |
|      | EGFR              | Nonsmall cell lung cancer, susceptibility to, 211980                                                       | Cancer         | 110 |
|      | EGF               | Menopause (age at onset)                                                                                   | Cancer         | 110 |
| 112  | IRS1              | Lymphocyte counts                                                                                          | Cancer         | 110 |
|      | IRS1              | Coronary artery disease, susceptibility to                                                                 | Cardiovascular | 110 |
|      | EGFR              | HDL particle features                                                                                      | Cardiovascular | 110 |
|      | INSR              | Aortic root size                                                                                           | Cardiovascular | 110 |
|      | IRS2              | Response to statin treatment (atorvastatin), change in cholesterol levels                                  | Cardiovascular | 110 |
|      | EGF               | Cardiovascular disease                                                                                     | Cardiovascular | 110 |
|      | EGF               | Blood pressure, CVD RF and other traits                                                                    | Cardiovascular | 110 |
|      | GHR               | Blood pressure, CVD RF and other traits                                                                    | Cardiovascular | 110 |
|      | IRS2              | Body Fat Distribution                                                                                      | Cardiovascular | 110 |
|      | EGFR              | Chemotherapeutic response (cytarabine, 5' deoxyfluorouridine, carboplatin, cisplatin), in blood cell lines | Cardiovascular | 110 |
|      | LYN               | Chemotherapeutic response (cytarabine, 5' deoxyfluorouridine, carboplatin, cisplatin), in blood cell lines | Cardiovascular | 110 |
|      | INSR              | Thyroid hormone levels                                                                                     | Cardiovascular | 110 |
|      | JAK2              | Budd-Chiari syndrome, 600880                                                                               | Cardiovascular | 110 |
|      | IRS1              | Sudden cardiac arrest                                                                                      | Cardiovascular | 110 |
|      | SHC1              | White blood cell count                                                                                     | Cardiovascular | 110 |
|      | EGFR              | HDL cholesterol                                                                                            | Cardiovascular | 110 |
|      | PDE4A             | Coronary heart disease                                                                                     | Cardiovascular | 110 |
|      | INSR              | Triglycerides                                                                                              | Cardiovascular | 110 |
| IRS1 | Lymphocyte counts | Cardiovascular                                                                                             | 110            |     |
| 113  | INSR              | Diabetes mellitus, insulin-resistant, with acanthosis nigricans, 610549                                    | Endocrine      | 110 |
|      | IRS1              | Diabetes mellitus, noninsulin-dependent, 125853                                                            | Endocrine      | 110 |
|      | STA5B             | Growth hormone insensitivity with immunodeficiency, 245590                                                 | Endocrine      | 110 |
|      | IRS2              | Diabetes mellitus, noninsulin-dependent, 125853                                                            | Endocrine      | 110 |
|      | INSR              | Polycystic ovary syndrome                                                                                  | Endocrine      | 110 |
|      | INSR              | Type 2 diabetes                                                                                            | Endocrine      | 110 |
|      | PDE4A             | Type 1 diabetes                                                                                            | Endocrine      | 110 |
|      | INSR              | Hypothyroidism                                                                                             | Endocrine      | 110 |
|      | INSR              | Thyroid hormone levels                                                                                     | Endocrine      | 110 |
|      | INSR              | Leprechaunism, 246200                                                                                      | Endocrine      | 110 |
|      | INSR              | Rabson-Mendenhall syndrome, 262190                                                                         | Endocrine      | 110 |
|      | GHR               | Increased responsiveness to growth hormone                                                                 | Endocrine      | 110 |
|      | GHR               | Laron dwarfism, 262500                                                                                     | Endocrine      | 110 |
|      | GHR               | Short stature, autosomal dominant, with normal serum growth hormone binding protein                        | Endocrine      | 110 |

|       |                          |                                                           |                    |              |
|-------|--------------------------|-----------------------------------------------------------|--------------------|--------------|
|       | GHR                      | Short stature, idiopathic                                 | Endocrine          | 110          |
|       | EGFR                     | Diabetic retinopathy                                      | Endocrine          | 110          |
|       | INSR                     | Diabetic retinopathy                                      | Endocrine          | 110          |
|       | INSR                     | Hyperinsulinemic hypoglycemia, familial, 5, 609968        | Endocrine          | 110          |
| 114   | PTN1                     | Abdominal body fat distribution, modifier of, 609830      | Metabolic          | 110          |
|       | PTN1                     | Insulin resistance, susceptibility to                     | Metabolic          | 110          |
|       | INSR                     | Hyperinsulinemic hypoglycemia, familial, 5, 609968        | Metabolic          | 110          |
|       | GHR                      | Iron status biomarkers                                    | Metabolic          | 110          |
|       | INSR                     | Obesity (extreme)                                         | Metabolic          | 110          |
|       | LYN                      | Weight                                                    | Metabolic          | 110          |
|       | IRS2                     | Weight                                                    | Metabolic          | 110          |
|       | SH2B1                    | Obesity (extreme)                                         | Metabolic          | 110          |
|       | SH2B1                    | Weight                                                    | Metabolic          | 110          |
|       | SH2B1                    | Obesity                                                   | Metabolic          | 110          |
|       | INSR                     | Triglycerides                                             | Metabolic          | 110          |
| 115   | LYN                      | Parkinson`s disease (familial)                            | Neurological       | 110          |
|       | GHR                      | Information processing speed                              | Neurological       | 110          |
|       | SH2B2                    | Information processing speed                              | Neurological       | 110          |
|       | EGFR                     | Glioma                                                    | Neurological       | 110          |
|       | EGF                      | Progressive supranuclear palsy                            | Neurological       | 110          |
|       | SH2B1                    | Body mass index                                           | Neurological       | 110          |
|       | INSR                     | Schizophrenia                                             | Neurological       | 110          |
|       | EGF                      | Alzheimer`s disease                                       | Neurological       | 110          |
|       | EGFR                     | Alzheimer`s disease (late onset)                          | Neurological       | 110          |
|       | EGFR                     | Alzheimer`s disease                                       | Neurological       | 110          |
|       | GHR                      | Alzheimer`s disease                                       | Neurological       | 110          |
|       | JAK2                     | Alzheimer`s disease (late onset)                          | Neurological       | 110          |
|       | INSR                     | Amyotrophic Lateral Sclerosis                             | Neurological       | 110          |
| EGF   | Menopause (age at onset) | Neurological                                              | 110                |              |
| 116   | ACTN1                    | Suicide attempts in bipolar disorder                      | Psychiatric        | 111          |
|       | DACH1                    | White matter integrity                                    | Psychiatric        | 111          |
|       | KLC2                     | Schizophrenia(treatment response to risperidone)          | Psychiatric        | 111          |
|       | CBLC                     | Lipoprotein-associated phospholipase A2 activity and mass | Psychiatric        | 111          |
|       | ACTN1                    | Coronary heart disease                                    | Psychiatric        | 111          |
|       | TOP1                     | Coronary heart disease                                    | Psychiatric        | 111          |
|       | ACTN1                    | Brain structure                                           | Psychiatric        | 111          |
|       | ATF3                     | Alzheimer`s disease (late onset)                          | Psychiatric        | 111          |
|       | CBLC                     | Alzheimer`s disease                                       | Psychiatric        | 111          |
|       | ITCH                     | Alzheimer`s disease (late onset)                          | Psychiatric        | 111          |
|       | DAXX                     | Cholesterol                                               | Psychiatric        | 111          |
|       | TOP1                     | Cholesterol, total                                        | Psychiatric        | 111          |
|       |                          | SAE1                                                      | Multiple sclerosis | Neurological |
| TOP1  |                          | Taste perception                                          | Neurological       | 111          |
| IKZF3 |                          | Myasthenia gravis                                         | Neurological       | 111          |

|       |       |                                                                                           |                                                                              |               |
|-------|-------|-------------------------------------------------------------------------------------------|------------------------------------------------------------------------------|---------------|
| 117   | PML   | Progranulin levels                                                                        | Neurological                                                                 | 111           |
|       | ITCH  | Narcolepsy                                                                                | Neurological                                                                 | 111           |
|       | DACH1 | White matter integrity                                                                    | Neurological                                                                 | 111           |
|       | KLC2  | Schizophrenia(treatment response to risperidone)                                          | Neurological                                                                 | 111           |
|       | ACTN1 | Brain structure                                                                           | Neurological                                                                 | 111           |
|       | ATF3  | Alzheimer`s disease (late onset)                                                          | Neurological                                                                 | 111           |
|       | CBLC  | Alzheimer`s disease                                                                       | Neurological                                                                 | 111           |
|       | ITCH  | Alzheimer`s disease (late onset)                                                          | Neurological                                                                 | 111           |
|       | MK10  | Epileptic encephalopathy, Lennox-Gastaut type, 606369                                     | Neurological                                                                 | 111           |
|       | 118   | ATF3                                                                                      | Adverse response to chemotherapy (neutropenia/leucopenia) (cyclophosphamide) | Hematological |
| ATF3  |       | Adverse response to chemotherapy (neutropenia/leucopenia) (all anthracycline-based drugs) | Hematological                                                                | 111           |
| DACH1 |       | Adverse response to chemotherapy (neutropenia/leucopenia) (all anthracycline-based drugs) | Hematological                                                                | 111           |
| ITCH  |       | Protein C levels                                                                          | Hematological                                                                | 111           |
| IKZF3 |       | Self-reported allergy                                                                     | Hematological                                                                | 111           |
| ACTN1 |       | Blood pressure, CVD RF and other traits                                                   | Hematological                                                                | 111           |
| DTX1  |       | Blood pressure, CVD RF and other traits                                                   | Hematological                                                                | 111           |
| PML   |       | Blood Pressure                                                                            | Hematological                                                                | 111           |
| PML   |       | Lymphocyte counts                                                                         | Hematological                                                                | 111           |
| 119   | TOP1  | DNA topoisomerase I, camptothecin-resistant                                               | Metabolic                                                                    | 111           |
|       | TOP2A | DNA topoisomerase II, resistance to inhibition of, by amsacrine                           | Metabolic                                                                    | 111           |
|       | SUMO3 | Waist Circumference                                                                       | Metabolic                                                                    | 111           |
|       | IKZF3 | Lipid traits                                                                              | Metabolic                                                                    | 111           |
|       | DAXX  | Cholesterol                                                                               | Metabolic                                                                    | 111           |
|       | TOP1  | Cholesterol, total                                                                        | Metabolic                                                                    | 111           |
| 120   | DACH1 | Lung function                                                                             | Respiratory                                                                  | 111           |
|       | PML   | Pulmonary function                                                                        | Respiratory                                                                  | 111           |
|       | IKZF3 | Asthma (childhood onset)                                                                  | Respiratory                                                                  | 111           |
|       | IKZF3 | Asthma                                                                                    | Respiratory                                                                  | 111           |
|       | PML   | Lymphocyte counts                                                                         | Respiratory                                                                  | 111           |
|       | ACTN1 | Smoking behavior                                                                          | Respiratory                                                                  | 111           |
|       | IKZF3 | Systemic lupus erythematosus and Systemic sclerosis                                       | Respiratory                                                                  | 111           |
|       | DAXX  | Rheumatoid arthritis                                                                      | Respiratory                                                                  | 111           |
| 121   | FEN1  | Response to statin therapy                                                                | Neurological                                                                 | 112           |
|       | UBE2A | Mental retardation, X-linked syndromic                                                    | Neurological                                                                 | 112           |
|       | ATR   | Seckel syndrome 1, 210600                                                                 | Neurological                                                                 | 112           |
|       | MSH3  | Chronic fatigue syndrome                                                                  | Neurological                                                                 | 112           |
|       | PCNA  | Personality dimensions                                                                    | Neurological                                                                 | 112           |
|       | UBE2A | Brain connectivity                                                                        | Neurological                                                                 | 112           |
|       | RAD18 | Personality dimensions                                                                    | Neurological                                                                 | 112           |
|       | ATR   | Body mass index                                                                           | Neurological                                                                 | 112           |
|       | MSH6  | Mismatch repair cancer syndrome, 276300                                                   | Neurological                                                                 | 112           |
|       | MSH2  | Mismatch repair cancer syndrome, 276300                                                   | Neurological                                                                 | 112           |
|       | MSH6  | Endometrial cancer, familial, 608089                                                      | Cancer                                                                       | 112           |

|     |       |                                                            |                |     |
|-----|-------|------------------------------------------------------------|----------------|-----|
| 122 | MSH6  | Ovarian cancer, endometrioid type, 604370                  | Cancer         | 112 |
|     | MSH3  | Endometrial carcinoma                                      | Cancer         | 112 |
|     | MSH3  | Mammographic density                                       | Cancer         | 112 |
|     | FEN1  | Lung cancer                                                | Cancer         | 112 |
|     | POLH  | Xeroderma pigmentosum, variant type, 278750                | Cancer         | 112 |
|     | MSH6  | Colorectal cancer, hereditary nonpolyposis, type 5         | Cancer         | 112 |
|     | MSH2  | Colorectal cancer, hereditary nonpolyposis, type 1, 120435 | Cancer         | 112 |
|     | MSH6  | Mismatch repair cancer syndrome, 276300                    | Cancer         | 112 |
|     | MSH2  | Mismatch repair cancer syndrome, 276300                    | Cancer         | 112 |
|     | MSH2  | Muir-Torre syndrome, 158320                                | Cancer         | 112 |
| 123 | NFKB1 | Schizophrenia (treatment refractory)                       | Neurological   | 113 |
|     | BCL3  | Alzheimer`s disease                                        | Neurological   | 113 |
|     | BCL3  | Alzheimer`s disease (late onset)                           | Neurological   | 113 |
|     | RELB  | Alzheimer`s disease (late onset)                           | Neurological   | 113 |
|     | PIAS3 | Contrast sensitivity                                       | Neurological   | 113 |
|     | GFI1  | Multiple sclerosis                                         | Neurological   | 113 |
| 124 | LIS1  | Lissencephaly-1, 607432                                    | Neurological   | 115 |
|     | LIS1  | Subcortical laminar heterotopia                            | Neurological   | 115 |
|     | PGK1  | Phosphoglycerate kinase 1 deficiency, 300653               | Neurological   | 115 |
|     | UBA1  | Spinal muscular atrophy, X-linked 2, infantile, 301830     | Neurological   | 115 |
|     | DISC1 | Neuranatomic and neurocognitive phenotypes                 | Neurological   | 115 |
|     | DISC1 | Alzheimer`s disease                                        | Neurological   | 115 |
|     | DISC1 | Alzheimer`s disease (late onset)                           | Neurological   | 115 |
|     | DISC1 | Schizophrenia                                              | Neurological   | 115 |
|     | DISC1 | Suicide, with and without major depression                 | Neurological   | 115 |
|     | DISC1 | Smoking cessation                                          | Neurological   | 115 |
| 125 | PRKN2 | Parkinson disease, juvenile, type 2, 600116                | Neurological   | 116 |
|     | PRKN2 | Leprosy, susceptibility to, 607572                         | Neurological   | 116 |
|     | RBP2  | Schizophrenia(age at onset)                                | Neurological   | 116 |
|     | SNCAP | Parkinson disease, 168600                                  | Neurological   | 116 |
| 126 | ADRB3 | Atrial fibrillation                                        | Cardiovascular | 120 |
|     | DCC   | Aortic root size                                           | Cardiovascular | 120 |
|     | DCC   | Myocardial Infarction                                      | Cardiovascular | 120 |
|     | DOCK1 | Stroke                                                     | Cardiovascular | 120 |
|     | DOCK1 | Hypertension (essential hypertension)                      | Cardiovascular | 120 |
|     | DOCK1 | Blood pressure, CVD RF and other traits                    | Cardiovascular | 120 |
|     | DCC   | Bone mass and geometry                                     | Cardiovascular | 120 |
|     | NEO1  | Body Fat Distribution                                      | Cardiovascular | 120 |
|     | VINC  | Cardiomyopathy, dilated, 1W, 611407                        | Cardiovascular | 120 |
|     | DCC   | Platelet counts                                            | Cardiovascular | 120 |
|     | DCC   | Coronary heart disease                                     | Cardiovascular | 120 |
|     | DOCK1 | Coronary Artery Disease                                    | Cardiovascular | 120 |
|     | DOCK1 | Coronary heart disease                                     | Cardiovascular | 120 |
|     | DOCK1 | Response to statin therapy                                 | Cardiovascular | 120 |

|       |                                                |                                            |                |     |
|-------|------------------------------------------------|--------------------------------------------|----------------|-----|
|       | DCC                                            | Behcet's disease                           | Cardiovascular | 120 |
|       | SRC                                            | Lymphocyte counts                          | Cardiovascular | 120 |
| 127   | DOCK3                                          | Bipolar disorder                           | Psychiatric    | 120 |
|       | DCC                                            | Suicide attempts in bipolar disorder       | Psychiatric    | 120 |
|       | DOCK1                                          | Suicide attempts in bipolar disorder       | Psychiatric    | 120 |
|       | DCC                                            | Schizophrenia                              | Psychiatric    | 120 |
|       | DOCK1                                          | White matter integrity                     | Psychiatric    | 120 |
|       | DOCK3                                          | Schizophrenia                              | Psychiatric    | 120 |
|       | DCC                                            | Platelet counts                            | Psychiatric    | 120 |
|       | DCC                                            | Coronary heart disease                     | Psychiatric    | 120 |
|       | DOCK1                                          | Coronary Artery Disease                    | Psychiatric    | 120 |
|       | DOCK1                                          | Coronary heart disease                     | Psychiatric    | 120 |
|       | DCC                                            | Alzheimer's disease                        | Psychiatric    | 120 |
|       | DCC                                            | Brain structure                            | Psychiatric    | 120 |
|       | DOCK1                                          | Alzheimer's disease                        | Psychiatric    | 120 |
|       | BCAR1                                          | Alzheimer's disease (late onset)           | Psychiatric    | 120 |
|       | DCC                                            | Amyotrophic Lateral Sclerosis              | Psychiatric    | 120 |
|       | NEO1                                           | Amyotrophic Lateral Sclerosis              | Psychiatric    | 120 |
|       | DOCK1                                          | Response to statin therapy                 | Psychiatric    | 120 |
|       | DCC                                            | Personality dimensions                     | Psychiatric    | 120 |
|       | DCC                                            | Cognitive impairment induced by topiramate | Psychiatric    | 120 |
|       | DOCK1                                          | Cognitive test performance                 | Psychiatric    | 120 |
|       | NEO1                                           | Cognitive impairment induced by topiramate | Psychiatric    | 120 |
|       | BCAR1                                          | Cognitive performance                      | Psychiatric    | 120 |
|       | DCC                                            | Alcoholism (heaviness of drinking)         | Psychiatric    | 120 |
| DCC   | Alcoholism (alcohol use disorder factor score) | Psychiatric                                | 120            |     |
| DOCK1 | Alcohol dependence                             | Psychiatric                                | 120            |     |
| DOCK3 | Alcohol dependence                             | Psychiatric                                | 120            |     |
| 128   | ADRB3                                          | Obesity, susceptibility to, 601665         | Metabolic      | 120 |
|       | DOCK1                                          | Apolipoprotein Levels                      | Metabolic      | 120 |
|       | DCC                                            | Obesity-related traits                     | Metabolic      | 120 |
|       | DOCK1                                          | Iron levels                                | Metabolic      | 120 |
|       | DOCK1                                          | Magnesium levels                           | Metabolic      | 120 |
|       | DOCK1                                          | Weight                                     | Metabolic      | 120 |
|       | DCC                                            | Bone mass and geometry                     | Metabolic      | 120 |
|       | NEO1                                           | Body Fat Distribution                      | Metabolic      | 120 |
| 129   | DCC                                            | Body mass index (interaction)              | Neurological   | 120 |
|       | DOCK1                                          | Body mass index                            | Neurological   | 120 |
|       | SRC                                            | Colon cancer, advanced (3)                 | Neurological   | 120 |
|       | VINC                                           | Cardiomyopathy, dilated, 1W, 611407        | Neurological   | 120 |
|       | DCC                                            | Schizophrenia                              | Neurological   | 120 |
|       | DOCK1                                          | White matter integrity                     | Neurological   | 120 |
|       | DOCK3                                          | Schizophrenia                              | Neurological   | 120 |
|       | DCC                                            | Alzheimer's disease                        | Neurological   | 120 |

|     |       |                                                                           |                |     |
|-----|-------|---------------------------------------------------------------------------|----------------|-----|
|     | DCC   | Brain structure                                                           | Neurological   | 120 |
|     | DOCK1 | Alzheimer`s disease                                                       | Neurological   | 120 |
|     | BCAR1 | Alzheimer`s disease (late onset)                                          | Neurological   | 120 |
|     | DCC   | Amyotrophic Lateral Sclerosis                                             | Neurological   | 120 |
|     | NEO1  | Amyotrophic Lateral Sclerosis                                             | Neurological   | 120 |
|     | DOCK1 | Response to statin therapy                                                | Neurological   | 120 |
|     | NPHP1 | Joubert syndrome 4, 609583                                                | Neurological   | 120 |
|     | DCC   | Personality dimensions                                                    | Neurological   | 120 |
|     | DCC   | Cognitive impairment induced by topiramate                                | Neurological   | 120 |
|     | DOCK1 | Cognitive test performance                                                | Neurological   | 120 |
|     | NEO1  | Cognitive impairment induced by topiramate                                | Neurological   | 120 |
|     | BCAR1 | Cognitive performance                                                     | Neurological   | 120 |
|     | DCC   | Response to mTOR inhibitor (everolimus)                                   | Neurological   | 120 |
|     | DOCK1 | Response to mTOR inhibitor (everolimus)                                   | Neurological   | 120 |
|     | DCC   | Behcet`s disease                                                          | Neurological   | 120 |
| 130 | ATR   | Red blood cell traits                                                     | Hematological  | 121 |
|     | BRCA2 | Fanconi anemia, complementation group D1, 605724                          | Hematological  | 121 |
|     | BLM   | Bloom syndrome, 210900                                                    | Hematological  | 121 |
|     | ATR   | Seckel syndrome 1, 210600                                                 | Hematological  | 121 |
|     | RAD51 | Lymphocyte counts                                                         | Hematological  | 121 |
| 131 | PLD1  | Response to gemcitabine or arabinosylcytosin in blood cell lines          | Cancer         | 122 |
|     | NSF   | Prostate cancer                                                           | Cancer         | 122 |
|     | NSF   | Ovarian cancer in BRCA1 mutation carriers                                 | Cancer         | 122 |
|     | EHD3  | Testosterone levels                                                       | Cancer         | 122 |
|     | EHD3  | Estradiol levels                                                          | Cancer         | 122 |
|     | SYT1  | Response to taxane treatment (paclitaxel)                                 | Cancer         | 122 |
|     | STX7  | Lymphocyte counts                                                         | Cancer         | 122 |
| 132 | NSF   | Red blood cell traits                                                     | Hematological  | 122 |
|     | STX4  | Acenocoumarol maintenance dosage                                          | Hematological  | 122 |
|     | STX1B | Red blood cell traits                                                     | Hematological  | 122 |
|     | STX1B | Acenocoumarol maintenance dosage                                          | Hematological  | 122 |
|     | TRIM9 | Blood pressure, CVD RF and other traits                                   | Hematological  | 122 |
|     | EHD3  | Platelet counts                                                           | Hematological  | 122 |
|     | EHD3  | Mean platelet volume                                                      | Hematological  | 122 |
|     | STX7  | Lymphocyte counts                                                         | Hematological  | 122 |
| 133 | PLD1  | Response to statin treatment (atorvastatin), change in cholesterol levels | Cardiovascular | 122 |
|     | SYT1  | Aortic root size                                                          | Cardiovascular | 122 |
|     | PLD1  | Tunica Media                                                              | Cardiovascular | 122 |
|     | VAMP3 | Stroke                                                                    | Cardiovascular | 122 |
|     | TRIM9 | Blood pressure, CVD RF and other traits                                   | Cardiovascular | 122 |
|     | STX4  | Warfarin maintenance dose                                                 | Cardiovascular | 122 |
|     | STX4  | Warfarin responsiveness (phenprocoumon)                                   | Cardiovascular | 122 |
|     | STX1B | Warfarin responsiveness (phenprocoumon)                                   | Cardiovascular | 122 |
|     | EHD3  | Platelet counts                                                           | Cardiovascular | 122 |

|       |                      |                                                                                       |                |     |
|-------|----------------------|---------------------------------------------------------------------------------------|----------------|-----|
|       | TRIM9                | Coronary Artery Disease                                                               | Cardiovascular | 122 |
|       | TRIM9                | Coronary heart disease                                                                | Cardiovascular | 122 |
|       | EHD3                 | Mean platelet volume                                                                  | Cardiovascular | 122 |
|       | STX7                 | Lymphocyte counts                                                                     | Cardiovascular | 122 |
| 134   | PLD1                 | Metabolite levels                                                                     | Endocrine      | 122 |
|       | PLD1                 | Type 2 diabetes                                                                       | Endocrine      | 122 |
|       | SYT1                 | Insulin-related traits                                                                | Endocrine      | 122 |
|       | SYT1                 | Type 2 diabetes                                                                       | Endocrine      | 122 |
|       | SYT1                 | Type 2 diabetes and 6 quantitative traits                                             | Endocrine      | 122 |
|       | STX1B                | Type 2 diabetes                                                                       | Endocrine      | 122 |
|       | TRIM9                | Type 2 diabetes                                                                       | Endocrine      | 122 |
| 135   | PLD1                 | Bipolar disorder and schizophrenia                                                    | Psychiatric    | 122 |
|       | PLD1                 | Bipolar disorder                                                                      | Psychiatric    | 122 |
|       | TRIM9                | Bipolar disorder                                                                      | Psychiatric    | 122 |
|       | SYT1                 | Depression (quantitative trait)                                                       | Psychiatric    | 122 |
|       | CPLX1                | Major depressive disorder                                                             | Psychiatric    | 122 |
|       | TRIM9                | Nicotine smoking                                                                      | Psychiatric    | 122 |
|       | STX4                 | Warfarin maintenance dose                                                             | Psychiatric    | 122 |
|       | STX4                 | Warfarin responsiveness (phenprocoumon)                                               | Psychiatric    | 122 |
|       | STX1B                | Warfarin responsiveness (phenprocoumon)                                               | Psychiatric    | 122 |
|       | EHD3                 | Platelet counts                                                                       | Psychiatric    | 122 |
|       | TRIM9                | Coronary Artery Disease                                                               | Psychiatric    | 122 |
|       | TRIM9                | Coronary heart disease                                                                | Psychiatric    | 122 |
|       | EHD3                 | Mean platelet volume                                                                  | Psychiatric    | 122 |
|       | SYT1                 | Electroencephalogram traits, in brain                                                 | Psychiatric    | 122 |
|       | STX7                 | Alcohol dependence                                                                    | Psychiatric    | 122 |
|       | SYT1                 | Creutzfeldt-Jakob disease (variant)                                                   | Psychiatric    | 122 |
|       | NSF                  | Parkinson`s disease                                                                   | Psychiatric    | 122 |
| TRIM9 | Psychosis (atypical) | Psychiatric                                                                           | 122            |     |
| TRIM9 | Narcolepsy           | Psychiatric                                                                           | 122            |     |
| 136   | TBK1                 | Major depressive disorder (broad)                                                     | Psychiatric    | 123 |
|       | MAVS                 | Depression (quantitative trait)                                                       | Psychiatric    | 123 |
|       | TANK                 | Tourette syndrome                                                                     | Psychiatric    | 123 |
|       | PELI2                | Schizophrenia                                                                         | Psychiatric    | 123 |
|       | IRAK1                | Alzheimer`s disease                                                                   | Psychiatric    | 123 |
|       | TRAF3                | Alzheimer`s disease                                                                   | Psychiatric    | 123 |
|       | TRAF1                | Multiple sclerosis                                                                    | Psychiatric    | 123 |
|       | TANK                 | Parkinson`s disease                                                                   | Psychiatric    | 123 |
|       | TRAF3                | Brain imaging in schizophrenia (interaction)                                          | Psychiatric    | 123 |
|       | NCOR2                | Suicide attempts in bipolar disorder                                                  | Psychiatric    | 127 |
|       | NCOR2                | Cocaine dependence                                                                    | Psychiatric    | 127 |
|       | HDAC5                | Cocaine dependence                                                                    | Psychiatric    | 127 |
|       | PPARG                | Lipoprotein-associated phospholipase A2 activity change in response to statin therapy | Psychiatric    | 127 |
|       | PPARG                | Plasminogen activator inhibitor type 1 levels (PAI-1)                                 | Psychiatric    | 127 |

|     |       |                                                     |              |     |
|-----|-------|-----------------------------------------------------|--------------|-----|
| 137 | PPARG | Coronary heart disease                              | Psychiatric  | 127 |
|     | PPARG | Alzheimer`s disease                                 | Psychiatric  | 127 |
|     | NCOR2 | Alzheimer`s disease (late onset)                    | Psychiatric  | 127 |
|     | NCOR2 | Cognitive performance                               | Psychiatric  | 127 |
|     | PPARG | Memory performance                                  | Psychiatric  | 127 |
|     | NCOR2 | Progranulin levels                                  | Psychiatric  | 127 |
|     | PPARG | Alcohol dependence                                  | Psychiatric  | 127 |
| 138 | PRIO  | Gerstmann-Straussler disease, 137440                | Neurological | 131 |
|     | PRIO  | Huntington disease-like 1, 603218                   | Neurological | 131 |
|     | PRIO  | Prion disease with protracted course, 606688        | Neurological | 131 |
|     | PRIO  | Creutzfeldt-Jakob disease, 123400                   | Neurological | 131 |
|     | GNA12 | Parkinson`s disease                                 | Neurological | 131 |
|     | CDC37 | Parkinson`s disease (familial)                      | Neurological | 131 |
|     | SIM1  | Intracranial aneurysm                               | Neurological | 131 |
|     | PRIO  | Insomnia, fatal familial, 600072                    | Neurological | 131 |
| 139 | SIM1  | Pancreatic cancer                                   | Endocrine    | 131 |
|     | AIP   | Pituitary adenoma, ACTH-secreting, 219090           | Endocrine    | 131 |
|     | AIP   | Pituitary adenoma, growth hormone-secreting, 102200 | Endocrine    | 131 |
|     | AIP   | Pituitary adenoma, prolactin-secreting, 600634      | Endocrine    | 131 |
|     | SIM1  | Obesity, severe, 601665                             | Endocrine    | 131 |
|     | PPID  | Metabolite levels                                   | Endocrine    | 131 |
|     | SIM1  | Metabolite levels                                   | Endocrine    | 131 |

D\_M denotes index of disease modules, and T\_M denotes topological modules.

Supplementary table 4: Summary of Pathway enrichment analysis of topological modules.

| T_Modules | Gene counts | Hit counts | %    | Top 1 term                                  | Benjamini   |
|-----------|-------------|------------|------|---------------------------------------------|-------------|
| Module 3  | 8           | 6          | 75   | Membrane Trafficking                        | 1.99E-10    |
| Module 4  | 6           | 3          | 50   | Angiogenesis                                | 0.05        |
| Module 6  | 6           | 4          | 66.7 | ALK in cardiac myocytes                     | 0.001993089 |
| Module 7  | 4           | 4          | 100  | Nucleotide excision repair                  | 1.21E-06    |
| Module 8  | 5           | 4          | 80   | 3' -UTR-mediated translational regulation   | 1.25E-04    |
| Module 12 | 6           | 3          | 50   | Hedgehog signaling pathway                  | 3.57E-04    |
| Module 14 | 4           | 3          | 75   | Base excision repair                        | 2.76E-04    |
| Module 15 | 3           | 3          | 100  | Basal transcription factors                 | 9.21E-05    |
| Module 16 | 24          | 18         | 75   | Gene Expression                             | 1.16E-17    |
| Module 17 | 6           | 6          | 100  | Adipocytokine signaling pathway             | 1.71E-09    |
| Module 18 | 7           | 3          | 42.9 | Map Kinase Inactivation of SMRT Corepressor | 0.002227212 |
| Module 19 | 9           | 7          | 77.8 | ECM-receptor interaction                    | 6.94E-09    |
| Module 20 | 6           | 3          | 50   | ECM-receptor interaction                    | 0.001347711 |
| Module 22 | 12          | 10         | 90.9 | Metabolism of non-coding RNA                | 9.06E-21    |
| Module 23 | 17          | 17         | 100  | DNA Replication                             | 1.09E-25    |
| Module 24 | 4           | 3          | 75   | Synaptic Transmission                       | 5.61E-04    |
| Module 26 | 5           | 5          | 100  | Toll-like receptor signaling pathway        | 7.34E-07    |
| Module 27 | 45          | 14         | 31.1 | Cell cycle                                  | 1.23E-13    |

|           |    |    |      |                                              |             |
|-----------|----|----|------|----------------------------------------------|-------------|
| Module 29 | 5  | 5  | 100  | Pathogenic Escherichia coli infection        | 4.26E-08    |
| Module 30 | 4  | 4  | 100  | Spliceosome                                  | 2.97E-05    |
| Module 31 | 25 | 16 | 64   | Transcription                                | 4.71E-20    |
| Module 34 | 18 | 17 | 94.4 | MAPK signaling pathway                       | 1.04E-19    |
| Module 35 | 18 | 17 | 94.4 | Proteasome                                   | 8.17E-33    |
| Module 36 | 25 | 16 | 64   | Proteasome                                   | 6.13E-29    |
| Module 39 | 27 | 7  | 25.9 | Mechanism of Protein Import into the Nucleus | 1.42235E-10 |
| Module 40 | 27 | 4  | 14.8 | Regulation of eIF2                           | 0.000463134 |
| Module 41 | 5  | 4  | 80   | Ribosome                                     | 9.68E-06    |
| Module 42 | 22 | 11 | 50   | Ubiquitin mediated proteolysis               | 4.26E-13    |
| Module 45 | 5  | 5  | 100  | MAPK signaling pathway                       | 7.44E-05    |
| Module 46 | 5  | 4  | 80   | Ubiquitin mediated proteolysis               | 1.15E-04    |
| Module 47 | 12 | 11 | 91.7 | Tight junction                               | 1.10E-14    |
| Module 50 | 6  | 4  | 66.7 | Synaptic vesicle trafficking                 | 7.02333E-05 |
| Module 51 | 11 | 10 | 90.9 | 3' -UTR-mediated translational regulation    | 4.75E-14    |
| Module 52 | 5  | 5  | 100  | Apoptosis                                    | 1.36E-06    |
| Module 54 | 7  | 5  | 71.4 | Metabolism of proteins                       | 6.58E-04    |
| Module 55 | 5  | 4  | 80   | Jak-STAT signaling pathway                   | 1.67E-04    |
| Module 57 | 4  | 4  | 100  | Cell adhesion molecules (CAMs)               | 0           |
| Module 58 | 5  | 4  | 80   | Axon guidance                                | 1.88E-04    |
| Module 60 | 8  | 7  | 87.5 | Regulation of autophagy                      | 6.78E-14    |
| Module 62 | 5  | 5  | 100  | Spliceosome                                  | 3.60E-07    |
| Module 63 | 3  | 3  | 100  | Adherens junction                            | 4.53E-04    |
| Module 64 | 6  | 4  | 66.7 | Gene Expression                              | 0.004330516 |
| Module 65 | 3  | 3  | 100  | Signaling by EGFR                            | 5.62E-04    |
| Module 66 | 5  | 3  | 60   | DNA Repair                                   | 0           |
| Module 67 | 7  | 7  | 100  | RNA degradation                              | 4.55E-12    |
| Module 68 | 8  | 5  | 62.5 | Mismatch repair                              | 9.55E-10    |
| Module 69 | 5  | 4  | 80   | RNA polymerase                               | 5.98E-07    |
| Module 71 | 8  | 3  | 37.5 | Integrin signalling pathway                  | 0.01745058  |
| Module 72 | 10 | 6  | 60   | Membrane Trafficking                         | 1.64E-08    |
| Module 74 | 30 | 9  | 30   | MAPK signaling pathway                       | 7.91E-05    |
| Module 75 | 19 | 8  | 42.1 | Endocytosis                                  | 7.25E-07    |
| Module 76 | 23 | 9  | 39.1 | Alzheimer disease-presenilin pathway         | 1.00E-07    |
| Module 79 | 13 | 9  | 69.2 | Cyclins and Cell Cycle Regulation            | 7.18E-13    |
| Module 80 | 23 | 10 | 43.5 | Apoptosis                                    | 1.99E-10    |
| Module 82 | 13 | 3  | 23.1 | TGF-beta signaling pathway                   | 0.000289415 |
| Module 83 | 88 | 18 | 20.5 | T cell receptor signaling pathway            | 9.24E-13    |
| Module 85 | 23 | 9  | 39.1 | Regulation of actin cytoskeleton             | 2.85E-06    |
| Module 86 | 4  | 3  | 75   | Cytosolic DNA-sensing pathway                | 0.007502646 |
| Module 87 | 9  | 8  | 88.9 | MAPK signaling pathway                       | 1.63E-08    |
| Module 88 | 19 | 4  | 21.1 | MAPK signaling pathway                       | 0.017005785 |
| Module 90 | 34 | 7  | 20.6 | Ionotropic glutamate receptor pathway        | 3.586E-6    |
| Module 91 | 10 | 6  | 60   | TGF-beta signaling pathway                   | 9.84E-07    |

|            |    |    |      |                                                                                         |             |
|------------|----|----|------|-----------------------------------------------------------------------------------------|-------------|
| Module 92  | 11 | 4  | 36.4 | Overview of telomerase RNA component gene hTerc<br>Transcriptional Regulation           | 3.10079E-05 |
| Module 94  | 11 | 4  | 36.4 | Renal cell carcinoma                                                                    | 0.00015837  |
| Module 97  | 7  | 5  | 71.4 | The PRC2 Complex Sets Long-term Gene Silencing<br>Through Modification of Histone Tails | 4.04115E-09 |
| Module 98  | 6  | 6  | 100  | Angiogenesis                                                                            | 5.43E-06    |
| Module 100 | 13 | 12 | 92.3 | Chemokine signaling pathway                                                             | 9.99E-16    |
| Module 102 | 15 | 8  | 53.3 | Synaptic Transmission                                                                   | 1.17E-10    |
| Module 103 | 12 | 4  | 33.3 | Ahr Signal Transduction Pathway                                                         | 1.21446E-06 |
| Module 105 | 4  | 3  | 75   | Huntington's disease                                                                    | 0.007289998 |
| Module 106 | 12 | 7  | 58.3 | Pathways in cancer                                                                      | 7.00E-06    |
| Module 110 | 21 | 7  | 33.3 | Growth Hormone Signaling Pathway                                                        | 7.59898E-08 |
| Module 111 | 40 | 9  | 23.1 | MAPK signaling pathway                                                                  | 0.000323456 |
| Module 112 | 18 | 8  | 44.4 | Mismatch repair                                                                         | 1.33393E-12 |
| Module 113 | 11 | 5  | 45.5 | Adipocytokine signaling pathway                                                         | 1.87E-05    |
| Module 114 | 6  | 5  | 83.3 | Notch signaling pathway                                                                 | 1.27E-07    |
| Module 115 | 10 | 3  | 30   | Ether lipid metabolism                                                                  | 0.00541589  |
| Module 116 | 6  | 4  | 66.7 | Parkinson's disease                                                                     | 3.12E-05    |
| Module 118 | 7  | 5  | 71.4 | Oocyte meiosis                                                                          | 5.10E-06    |
| Module 119 | 5  | 3  | 60   | MAPK signaling pathway                                                                  | 0.039148472 |
| Module 120 | 18 | 10 | 55.6 | Integrin signalling pathway                                                             | 5.53E-07    |
| Module 121 | 8  | 6  | 75   | Homologous recombination                                                                | 1.66E-10    |
| Module 122 | 26 | 14 | 53.9 | SNARE interactions in vesicular transport                                               | 9.94E-26    |
| Module 124 | 11 | 6  | 54.5 | Ubiquitin mediated proteolysis                                                          | 3.98E-06    |
| Module 123 | 21 | 7  | 33.3 | Small cell lung cancer                                                                  | 2.96E-06    |
| Module 129 | 7  | 7  | 100  | Endocytosis                                                                             | 4.15E-09    |
| Module 131 | 16 | 4  | 25   | Antigen processing and presentation                                                     | 0.003315967 |
| Module 135 | 5  | 5  | 100  | Endocytosis                                                                             | 1.66E-06    |

T\_Modules denotes index of Topological modules.
